# Supplementary material for: Biogenesis and Mechanism of Action of Small Non-Coding RNAs: Insights from the Point of View of Structural Biology
Source: MDPI journal article supplement (doi:10.3390/ijms130810268), 2012-08-17
Supplement: s1 [file s1]

# Supplementary Information

**Figure S1.** Disorder prediction by CSpritz [1] algorithm of human Drosha showing two different regions: a N-terminal disordered region and a C-terminal structured region comprising the two RNase domains and the dsRNA binding domain.

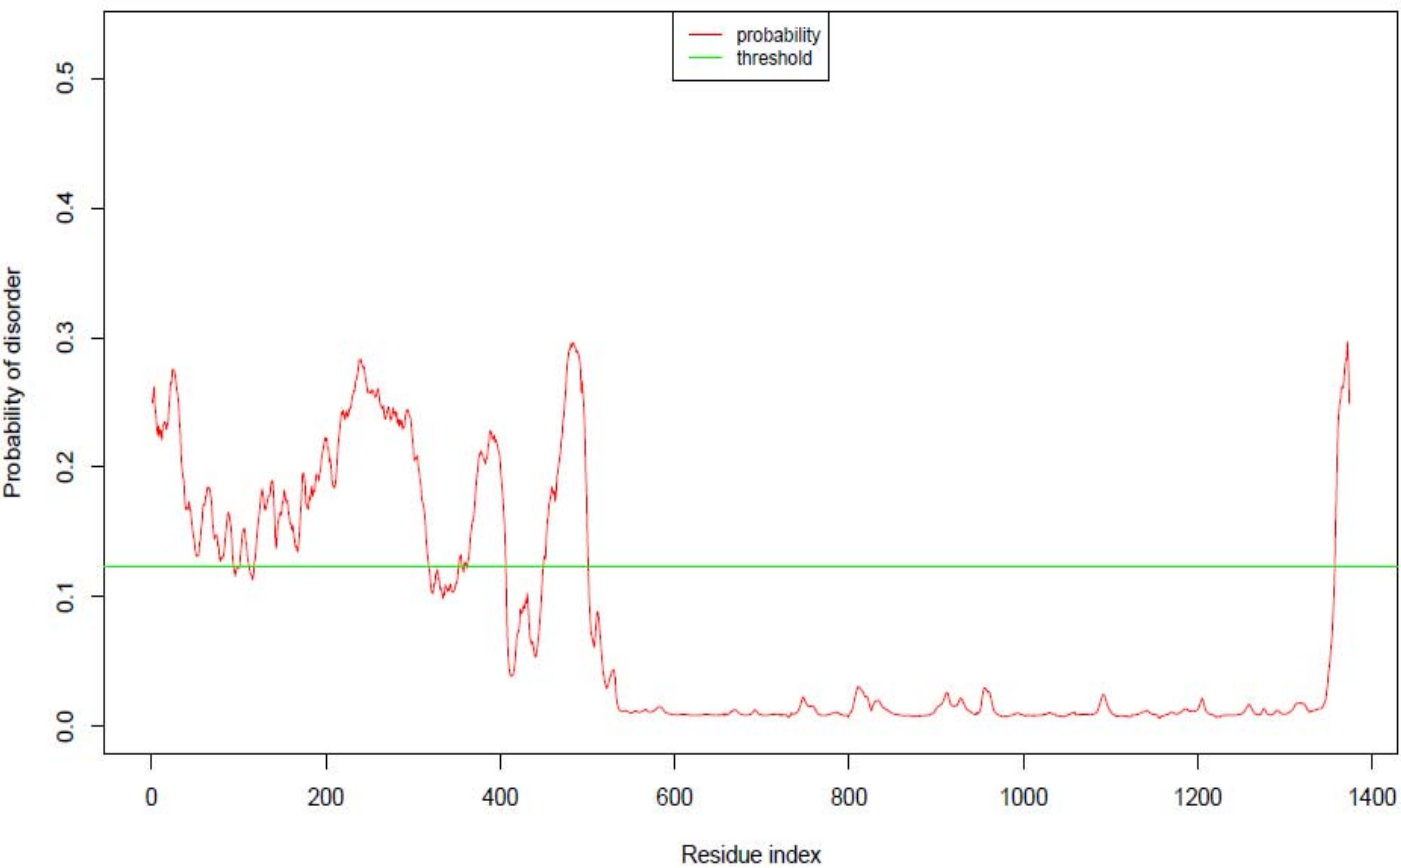

**Figure S2.** Alignment of Dicer proteins from several eukaryotic organisms constructed by PRALINE software [2]. Color codes refer to the conservation of a particular residue in each protein position.

### Results colour-coded for amino acid conservation

The current colourscheme of the alignment is for amino acid conservation. The conservation scoring is performed by PRALINE. The scoring scheme works from 0 for the least conserved alignment position, up to 10 for the most conserved alignment position. The colour assignments are:

Unconserved 0 1 2 3 4 5 6 7 8 9 10 Conserved

|                 | ..... 10   | ..... 20   | ..... 30   | ..... 40   | ..... 50   |
|-----------------|------------|------------|------------|------------|------------|
| Homo_sapiens    | -          | -          | -          | -          | -          |
| Bos_taurus      | -          | -          | -          | -          | -          |
| Mus_musculus    | -          | -          | -          | -          | -          |
| Gallus_gallus   | -          | -          | -          | -          | -          |
| Xenopus_tropica | -          | -          | -          | -          | -          |
| Danio_rerio     | -          | -          | -          | -          | -          |
| Caenorhabditis  | -          | -          | -          | -          | -          |
| Drosophila_mela | -          | -          | -          | -          | -          |
| Oryza_sativa_Ja | MAGGGGVGGG | AGEHA-AAAY | WYDACEGAS  | LLCGIDFAAS | ADFDPGLIPA |
| Arabidopsis_tha | MV---MEDE  | PREATIKPSY | WLDACED--- | ISCDLIDDLV | SEFDPSSVAV |
| Neurospora_cras | -          | -          | -          | -          | -          |
| Chaetomium_glob | -          | -          | -          | -          | -          |
| Coccidioides_im | -          | -          | -          | -          | -          |
| Aspergillus_nig | -          | -          | -          | -          | -          |
| Aspergillus_fum | -          | -          | -          | -          | -          |
| Aspergillus_cla | -          | -          | -          | -          | -          |
| Phaeosphaeria_n | -          | -          | -          | -          | -          |
| Schizosaccharom | -          | -          | -          | -          | -          |
| Emericella_nidu | -          | -          | -          | -          | -          |
| Cryphonectria_p | -          | -          | -          | -          | -          |
| Neosartorya_fis | -          | -          | -          | -          | -          |
| Candida_albican | -          | -          | -          | -          | -          |
| Kluyveromyces_l | -          | -          | -          | -          | -          |
| Schizosaccharom | -          | -          | -          | -          | -          |
| Consistency     | 0000000000 | 0000000000 | 0000000000 | 0000000000 | 0000000000 |
|                 | ..... 60   | ..... 70   | ..... 80   | ..... 90   | ..... 100  |
| Homo_sapiens    | -          | -          | -          | -          | -          |
| Bos_taurus      | -          | -          | -          | -          | -          |
| Mus_musculus    | -          | -          | -          | -          | -          |
| Gallus_gallus   | -          | -          | -          | -          | -          |
| Xenopus_tropica | -          | -          | -          | -          | -          |
| Danio_rerio     | -          | -          | -          | -          | -          |
| Caenorhabditis  | -          | -          | -          | -          | -          |
| Drosophila_mela | -          | -          | -          | -          | -          |
| Oryza_sativa_Ja | MDTGADDG-- | --FVAEIDRI | LESINAESSP | APPPPPPPPL | PEPVPVAPPE |
| Arabidopsis_tha | NESTDENGVI | NDFFGGIDHI | LDSIKNGG-- | -----      | GLPN       |
| Neurospora_cras | -          | -          | -          | -          | -          |
| Chaetomium_glob | -          | -          | -          | -          | -          |
| Coccidioides_im | -          | -          | -          | -          | -          |
| Aspergillus_nig | -          | -          | -          | -          | -          |
| Aspergillus_fum | -          | -          | -          | -          | -          |
| Aspergillus_cla | -          | -          | -          | -          | -          |
| Phaeosphaeria_n | -          | -          | -          | -          | -          |
| Schizosaccharom | -          | -          | -          | -          | -          |
| Emericella_nidu | -          | -          | -          | -          | -          |
| Cryphonectria_p | -          | -          | -          | -          | -          |
| Neosartorya_fis | -          | -          | -          | -          | -          |
| Candida_albican | -          | -          | -          | -          | -          |
| Kluyveromyces_l | -          | -          | -          | -          | -          |
| Schizosaccharom | -          | -          | -          | -          | -          |
| Consistency     | 0000000000 | 0000000000 | 0000000000 | 0000000000 | 0000000000 |
|                 | ..... 110  | ..... 120  | ..... 130  | ..... 140  | ..... 150  |
| Homo_sapiens    | -          | -          | -          | -          | -          |
| Bos_taurus      | -          | -          | -          | -          | -          |
| Mus_musculus    | -          | -          | -          | -          | -          |
| Gallus_gallus   | -          | -          | -          | -          | -          |
| Xenopus_tropica | -          | -          | -          | -          | -          |
| Danio_rerio     | -          | -          | -          | -          | -          |
| Caenorhabditis  | -          | -          | -          | -          | -          |
| Drosophila_mela | -          | -          | -          | -          | -          |
| Oryza_sativa_Ja | LPIQEKQLQV | ASAPVANNAV | AVVGVVQRS- | -KGVVARKEP | RRESHGCAAN |
| Arabidopsis_tha | NGVSDTNSQI | NEVTVTPQVI | AKETVKENGL | QKNGGKRDEF | SKEEGDKDRK |

|                 |            |            |            |            |            |            |            |
|-----------------|------------|------------|------------|------------|------------|------------|------------|
| Neurospora_cras | -----      | -----      | -----      | -----      | MAVAT      | RI--       | PFIPPE     |
| Chaetomium_glob | -----      | -----      | -----      | -----      | MNAEM      | REGSSALPQL |            |
| Coccidioides_im | -----      | -----      | -----      | -----      |            |            | ME         |
| Aspergillus_nig | -----      | -----      | -----      | -----      | MPSAH      |            | AFDMR      |
| Aspergillus_fum | -----      | -----      | -----      | -----      | MAEQI      |            | SL-VD      |
| Aspergillus_cla | -----      | -----      | -----      | -----      |            |            |            |
| Phaeosphaeria_n | -----      | -----      | -----      | -----      |            |            |            |
| Schizosaccharom | -----      | -----      | -----      | -----      |            |            |            |
| Emericella_nidu | -----      | -----      | -----      | -----      |            |            |            |
| Cryphonectria_p | -----      | -----      | -----      | -----      |            |            |            |
| Neosartorya_fis | -----      | -----      | -----      | -----      |            |            |            |
| Candida_albican | -----      | MI         | IFATPKVC   | KGKT       |            | RILYFYLSK  | LFFYVYFFFL |
| Kluyveromyces_l | -----      | -----      | -----      | -----      |            |            | MFCK       |
| Schizosaccharom | -----      | MI         | VI         | -----      |            | RDSSDYSDS  | EVDLPST--- |
| Consistency     | 0000000000 | 0000000000 | 0000000000 | 0000000000 | 0000000000 | 0000000000 | 0000000000 |

|                 |            |            |             |            |            |            |       |     |       |     |
|-----------------|------------|------------|-------------|------------|------------|------------|-------|-----|-------|-----|
|                 | .....      | 160        | .....       | 170        | .....      | 180        | ..... | 190 | ..... | 200 |
| Homo_sapiens    | -----      |            | -----       |            | -----      |            | ----- |     | ----- |     |
| Bos_taurus      | -----      |            | -----       |            | -----      |            | ----- |     | ----- |     |
| Mus_musculus    | -----      |            | -----       |            | -----      |            | ----- |     | ----- |     |
| Gallus_gallus   | -----      |            | -----       |            | -----      |            | ----- |     | ----- |     |
| Xenopus_tropica | -----      |            | -----       |            | -----      |            | ----- |     | ----- |     |
| Danio_rerio     | -----      |            | -----       |            | -----      |            | ----- |     | ----- |     |
| Caenorhabditis_ | -----      |            | -----       |            | -----      |            | ----- |     | ----- |     |
| Drosophila_mela | -----      |            | -----       |            | -----      |            | ----- |     | ----- |     |
| Oryza_sativa_Ja | GGGGGEWRDG | KRPRLASGGV | GGPRQEWRRR  | PMLPPPPSRG | WDD--      | RRGRR      |       |     |       |     |
| Arabidopsis_tha | RARVCSYQSE | RSNLSGRGHV | NNSREGDR--  | FMNRKRTRN  | WDEAGNNKKK |            |       |     |       |     |
| Neurospora_cras | ATSQIIGGDE | DLIDLSE-D  | VVSDNDDR--  | -----      | GNA        | SDV--      | ESEDG |     |       |     |
| Chaetomium_glob | QAHSPVADNI | DLMDIDEPAS | NGSFEEESPAT | PFDDDAFVNA | GDT--      | DQEDD      |       |     |       |     |
| Coccidioides_im | EPQRINDEPN | D-----     | SVVPD-----  | -----      | PAGPS      | EPA--      | ESDSE |     |       |     |
| Aspergillus_nig | ITSDIYKPDQ | HL-PMETMKV | CAVT-----   | -----      | MTE        | DLQ--      | EDDGS |     |       |     |
| Aspergillus_fum | VSSSVSLRGE | DSSNVALLRD | VFLPDVAAS-  | -----      | DPAESSV    | DVQ--      | DEHSS |     |       |     |
| Aspergillus_cla | MSSDLISQAE | SISNIEILRA | LFITDTHTTV  | GDVAVPSAEP | GVE--      | HDQIS      |       |     |       |     |
| Phaeosphaeria_n | -----      | -----      | -----       | -----      | MTWAG      | DVE--      | EQDDY |     |       |     |
| Schizosaccharom | -----      | -----      | -----       | -----      |            |            |       |     |       |     |
| Emericella_nidu | -----      | -----      | -----       | -----      |            |            |       |     |       |     |
| Cryphonectria_p | -----      | -----      | -----       | -----      |            |            |       |     |       |     |
| Neosartorya_fis | -----      | -----      | -----       | -----      |            |            |       |     |       |     |
| Candida_albican | IYYSIQKHSY | INSTMPIIPL | EDDEDDD--   | -----      | WIL        | EDEDDPEFQA |       |     |       |     |
| Kluyveromyces_l | QKHKTRKKPA | VNALMADLSD | LSDDDL--    | -----      | SLL        | ENN--      | VNRSV |     |       |     |
| Schizosaccharom | EVNGERGNV  | PTSVL----- | -----       | -----      | SLL        | NSNPALRQPN |       |     |       |     |
| Consistency     | 0000000000 | 0000100000 | 0000000000  | 0000000000 | 0000000000 | 0010001000 |       |     |       |     |

|                 |             |            |            |            |            |            |            |            |       |     |
|-----------------|-------------|------------|------------|------------|------------|------------|------------|------------|-------|-----|
|                 | .....       | 210        | .....      | 220        | .....      | 230        | .....      | 240        | ..... | 250 |
| Homo_sapiens    | -----       |            | -----      |            | -----      |            | -----      |            | ----- |     |
| Bos_taurus      | -----       |            | -----      |            | -----      |            | -----      |            | ----- |     |
| Mus_musculus    | -----       |            | -----      |            | -----      |            | -----      |            | ----- |     |
| Gallus_gallus   | -----       |            | -----      |            | -----      |            | -----      |            | ----- |     |
| Xenopus_tropica | -----       |            | -----      |            | -----      |            | -----      |            | ----- |     |
| Danio_rerio     | -----       |            | -----      |            | -----      |            | -----      |            | ----- |     |
| Caenorhabditis_ | -----       |            | -----      |            | -----      |            | -----      |            | ----- |     |
| Drosophila_mela | -----       |            | -----      |            | -----      |            | -----      |            | ----- |     |
| Oryza_sativa_Ja | DFDRVRKHEH  | HRREARGFWE | RDRG--     | GKMV       | FRSGTWEQES | DREAKRARTQ |            |            |       |     |
| Arabidopsis_tha | RECNNYRRDG  | RDREVRGYWE | RDKVGSNELV | YRSGTWEADH | ERDVKKVSGG |            |            |            |       |     |
| Neurospora_cras | --VKRWTVN   | PEPKPKKISA | KKLA--     | DTAA       | FNSWIEEHQE | TLA--      | RDQRKA     |            |       |     |
| Chaetomium_glob | DPDTKKWIVN  | DSRKPRKISE | KKRA--     | DHAA       | FDVWIEENQQ | DLS--      | KGLDKF     |            |       |     |
| Coccidioides_im | DEHTHP----  | -----      | NNADEPS    | IRRK--     | QNLR       | FKELLSARAE | EITAEDIKEV |            |       |     |
| Aspergillus_nig | SDESDN--DER | EDHSKTGVSQ | QRIT--     | QNAK       | FKALLAQRAD | TGPIHD--   | VSV        |            |       |     |
| Aspergillus_fum | DDSDNE--NE  | VFPKQNDFSQ | RRRI--     | QNAQ       | FEALLSKCTD | ADSNEAFDRA |            |            |       |     |
| Aspergillus_cla | PGESDEEIEE  | NISDQNNSSS | QKRL--     | QNAQ       | FEALLTRRAE | DTSNENIDRV |            |            |       |     |
| Phaeosphaeria_n | FSCSD-----  | -----      | VSTSGDR    | RKRA--     | PQTV       | TQEEVDQATS | KIANEG---- |            |       |     |
| Schizosaccharom | -----       | -----      | -----      | -----      |            |            |            |            |       |     |
| Emericella_nidu | -----       | -----      | -----      | -----      |            |            |            |            |       |     |
| Cryphonectria_p | -----       | -----      | MAYYTD     | SSSS--     | ESED       | FEDVINQVVA | EEDITGAAWY |            |       |     |
| Neosartorya_fis | -----       | -----      | -----      | -----      |            |            |            |            |       |     |
| Candida_albican | ILQGN-----  | -----      | SSKGPA     | QRTL--     | EGSV       | AAVSTRPQND | KYETIPVPVK |            |       |     |
| Kluyveromyces_l | NQTVT-----  | -----      | RHRIPV     | QRDL--     | FMNV       | L-----     | PNQQ       | TFYEETHTDV |       |     |
| Schizosaccharom | LKCIK-----  | -----      | HNQDVE     | NTTF--     | QLDL       | R-----     | GCRV       | PSSQPQVITE |       |     |
| Consistency     | 0000100000  | 0000111011 | 1111001111 | 1101112212 | 2122222212 |            |            |            |       |     |

|               |        |       |            |         |       |            |            |     |       |     |
|---------------|--------|-------|------------|---------|-------|------------|------------|-----|-------|-----|
|               | .....  | 260   | .....      | 270     | ..... | 280        | .....      | 290 | ..... | 300 |
| Homo_sapiens  | TPAS-- | SPMGP | FFGLPWQQEA | IHDNI-- | YTP   | RKYQVELLEA | ALDHNTIVCL |     |       |     |
| Bos_taurus    | TPAS-- | SPMGP | FFGLPWQQEA | IHDNI-- | YTP   | RKYQVELLEA | ALDHNTIVCL |     |       |     |
| Mus_musculus  | TPAS-- | SPMGP | FFGLPWQQEA | IHDNI-- | YTP   | RKYQVELLEA | ALDHNTIVCL |     |       |     |
| Gallus_gallus | TPAS-- | SPMGP | FFGLPWQQEA | IHDNI-- | YTP   | RKYQVELLEA | ALDHNTIVCL |     |       |     |

|                 |            |              |            |            |              |
|-----------------|------------|--------------|------------|------------|--------------|
| Xenopus_tropica | TPAS-SPMGP | FFGLPWQQA    | IHDNI--YTP | RKYQVELLEA | ALDHNTIVCL   |
| Danio_rerio     | TPAS-SPMGP | FFGLPWQQA    | IHDNI--YTP | RKYQVELLEA | ALEHNTIVCL   |
| Caenorhabditis  | -----      | -MV-----RVR  | ADLQC--FNP | RDYQVELLDK | ATKKNTIVQL   |
| Drosophila_mela | -----      | -MAFHWCDDN   | LHTTV--FTP | RDFQVELLAT | AYERNTIICL   |
| Oryza_sativa_Ja | DGGSMKKAE  | ADRMGAAQRE   | KPVAE--ERA | RQYQLEVLEQ | AKSRNTIAFL   |
| Arabidopsis_tha | NREC-DVKAE | ENKSKPEERK   | EKVVE--EQA | RRYQLDVLEQ | AKAKNTIAFL   |
| Neurospora_cras | AIEA-ARVAG | VDVLPAGFD    | SERII--TSP | REYQVELFER | AKQQNTIAVL   |
| Chaetomium_glob | IVDD-DGKTF | QSLIR--DFE   | NKRII--TSP | RDYQLELFER | AKTQNTIAVL   |
| Coccidioides_im | IKAT-KDDEL | SMSNLLAKQD   | FASVI--HDP | REYQVELFEK | AKKDNIIAVL   |
| Aspergillus_nig | THDL-PDAQ  | STAHLVAKQD   | LGIGT--LDP | REYQLELFER | AKVQNTIAVL   |
| Aspergillus_fum | PIAL-SDGEL | SIAHLVKKQD   | LGNGM--LDP | REYQIELFER | AKTQNTIAVL   |
| Aspergillus_cla | PLNL-SDNEL | SIAHLVAKQD   | VGGGL--LDP | REYQIELFER | AKAQNTIAVL   |
| Phaeosphaeria_n | -----      | QLSIRDILASQD | TAVRI--TNP | RDYQMELFLR | AKMQNTIAVL   |
| Schizosaccharom | -----      | -----MDI-    | -SSFLLPQLL | RKYQQDVYNI | ASKQNTLLVM   |
| Emericella_nidu | -----      | -----MASI    | PEERSAEHRA | RSYQLEMFEA | SLKGNIIIVM   |
| Cryphonectria_p | DGHL-SEEDS | PGGKPRPKEQ   | LPKDIVKMDA | RAYQLEMLEA | SLKENIICAM   |
| Neosartorya_fis | -----      | -----MASSVT  | ACQGASPYQP | RNYQLEMLEA | SMKENIIVAM   |
| Candida_albican | INT--PTHH  | AMDFENLKTY   | IYPTN--FEI | RDYQYNIVER | AFYDNL LVAL  |
| Kluyveromyces_l | SYG--PTHH  | QLNEENLDEY   | IYPTN--YEV | RQYQYDIVRC | ALFENVLCAI   |
| Schizosaccharom | LEN--NIDI  | PKNIDAMQNW   | IFPQT--QQY | RNYQKEFCEQ | ALFHNL L LAL |
| Consistency     | 2121022222 | 2232223543   | 4333500445 | *59*687675 | 9535*79658   |

|                 |            |            |             |            |            |
|-----------------|------------|------------|-------------|------------|------------|
|                 | .....310   | .....320   | .....330    | .....340   | .....350   |
| Homo_sapiens    | NTGSGKTFIA | VLLTKELSYQ | I-RGDFS RN- | -GKRTVFLVN | SANQVAQQVS |
| Bos_taurus      | NTGSGKTFIA | VLLTKELSYQ | I-RGDFNRN-  | -GKRTVFLVN | SANQVAQQVS |
| Mus_musculus    | NTGSGKTFIA | VLLTKELAHQ | I-RGDLNPH-  | -AKRTVFLVN | SANQVAQQVS |
| Gallus_gallus   | NTGSGKTFIA | VLLTKELSYQ | I-RGDFNKN-  | -GKRTVFLVN | SANQVAQQVS |
| Xenopus_tropica | NSGSGKTFIA | VLLSKELSYQ | I-RGDFS KN- | -TKRTVFLVN | SEKQVSQQVS |
| Danio_rerio     | NTGSGKTFIA | VLLIKELSHQ | I-RGE--N-   | -GKRTVFLVN | AASSVAQQAS |
| Caenorhabditis  | GTGSGKTFIA | VLLLKEYGVQ | L-FAPLDQG-  | -GKRAFFVVE | KVNLVEQQAI |
| Drosophila_mela | GHRSSKEFIA | LKLLQELSR  | A-RR--H-    | -GRVSVYLS  | EVGTSTEPCS |
| Oryza_sativa_Ja | ETGAGKTLIA | VLLIKSVCDK | M-LKENKK--  | --MLAVFLVP | KVPL-----  |
| Arabidopsis_tha | ETGAGKTLIA | ILLIKSVHKD | L-MSQNRK--  | --MLSVFLVP | KVPLVYQQAE |
| Neurospora_cras | DTGSGKTLIA | AMLLRWVITG | E-LEDREKGL  | PRRIAFFLVD | KVALVFQQHS |
| Chaetomium_glob | DTGSGKTLIA | ALLLRWTIQN | E-LEDRSKRL  | PKRIAFFLVD | KVALVFQQHA |
| Coccidioides_im | DTGSGKTLIA | VLLLKHIIEQ | E-LIDRSAEK  | PHRVSFLLVD | SVTLVFQQAA |
| Aspergillus_nig | DTGSGKTLIA | VLLLKHTLEK | E-LNDRMEGK  | PHRIAFFLVD | SVTLAYQQAA |
| Aspergillus_fum | DTGSGKTLIA | VLLLRHTILN | E-LDDRANGK  | THRVSFLLVD | SVTLAYQQAA |
| Aspergillus_cla | DTGSGKTLIA | VLLLRHVLQN | E-LNDRANGK  | PHRVSFLLVD | SVTLAYQQAA |
| Phaeosphaeria_n | DTGTGKTHIA | TLLLRHVLEE | E-LENRAKGC  | AHKMAFFLVD | SVNLVFQQAN |
| Schizosaccharom | RTGAGKTLIA | VKLKQKLEE  | QILIQESNLE  | HKKISVFLVN | KVPLVFQQAE |
| Emericella_nidu | GTGSGKTLIA | LLRIIHELEN | -----S      | DGKLIWFLAP | TVPLCLQQHR |
| Cryphonectria_p | DTGSGKTHVA | ILRIKAELEE | -----MP     | EGQVWFLTP  | TVSLCAQQYA |
| Neosartorya_fis | DTGSGKTHIA | VLRIKAELDI | -----CP     | PDKLVWFLAP | TVALCIQQHE |
| Candida_albican | PTGLGKTFIA | STVMLNFLRW | F-----      | PISKIIFMAP | TRPLVAQQIK |
| Kluyveromyces_l | PTGTGKTFIA | STVMLNYRW  | T-----      | KSSKIIFTAP | TRPLVAQQIK |
| Schizosaccharom | PTGLGKTFIA | AVVMLNYFRW | F-----      | PESKIIFLAP | TKPLLLQQRV |
| Consistency     | 59979*959* | 6776644444 | 3032312220  | 1364559874 | 6646648845 |

|                 |            |             |            |             |             |
|-----------------|------------|-------------|------------|-------------|-------------|
|                 | .....360   | .....370    | .....380   | .....390    | .....400    |
| Homo_sapiens    | AVRTHSD--  | LKVGEYSNLE  | VNASW-TKER | WNQEFTKHQV  | LIMTCYVALN  |
| Bos_taurus      | AVRTHSD--  | LKVGEYSNLE  | VSASW-TKEK | WNQEFTKHQV  | LIMTCYVALN  |
| Mus_musculus    | AVRTHSD--  | LKVGEYSDLE  | VNASW-TKER | WSQEFTKHQV  | LIMTCYVALT  |
| Gallus_gallus   | AVRTHSD--  | LKVGEYSSLE  | VTESW-TKEK | WSQEFTKHQV  | LVMTCYVALT  |
| Xenopus_tropica | AVRTHSD--  | LKVGEYSDQE  | KTQCW-AKER | WYLEFETHQV  | LVMTCYIFLN  |
| Danio_rerio     | TVRTHSD--  | LQVGDMSE-   | DMTSW-PEEM | WNREMIENQV  | LVMTCYIFLN  |
| Caenorhabditis  | HIEVHTS--  | FKVGQVHGQT  | SSGLWDSKEQ | CDQFMKRHHV  | VVITAQCLLD  |
| Drosophila_mela | IYTMLTHLTD | LRVWQEOPD-  | -----MQIP  | FDHCWTDYHV  | SILRPEGFLY  |
| Oryza_sativa_Ja | -----      | -VYQ-----   | -----      | -----V      | LVMTAQILLN  |
| Arabidopsis_tha | VIRNQTC--  | FQVGHYCGEM  | GQDFW-DSRR | WQREFESKQV  | LVMTAQILLN  |
| Neurospora_cras | FLTKNLD--  | FPMEKLCGEM  | VEGVE-SKAF | WKEALEQNEV  | VVCTAEILST  |
| Chaetomium_glob | VLA CNLD-- | YPLEKFCGDM  | VED-V-TQDF | WHKTFDENMA  | IVCTAEILYQ  |
| Coccidioides_im | VLQNNIN--  | QRVDKFCGAM  | ETDLW-NGET | WERHLAKNMV  | IVCTAEVLYQ  |
| Aspergillus_nig | VLRNNLD--  | QSVGHFFGAM  | GTDLW-SKSV | WDQHFKQNMV  | IVCTAEILNQ  |
| Aspergillus_fum | VLRNNID--  | QNVAHFFGAM  | GTDLW-DKRT | WDKHLQRNMV  | IVCTAEILNQ  |
| Aspergillus_cla | VLRNNID--  | QNVAHFFGAM  | GTDLW-DRQV | WEEHLQQNMV  | IVCTAEILNQ  |
| Phaeosphaeria_n | VLR CGLD-- | QGV EGISGAM | GQSLF-QKQT | WDKLF AVNMV | IVCTAQVLVD  |
| Schizosaccharom | YIRS QLP-- | AKVGMFYGEL  | SI-EMSE-QL | LTNII LKYNV | IVITADLFYL  |
| Emericella_nidu | VISQHIPP-- | VKSRTL LGSD | KVELWTEQAV | WDAVLEGLQV  | IVSTPAVLHD  |
| Cryphonectria_p | VVKAQIPP-- | VQTKIVTGAD  | KVDSW-SSTT | WDGALLNVKV  | IITTPQVLLD  |
| Neosartorya_fis | VIASNLP--  | VRTRTL TGLD | KVELWTEQSI | WDAVLNGYRV  | IVSTH AVLAD |
| Candida_albican | ACCSIAG--  | IPSSKVAILL  | DK----TRRN | RAEIWNSRQV  | FFTTPQVVEN  |
| Kluyveromyces_l | ACLGITG--  | IPYSDTAILL  | DK----SRKN | REEIWQQKRV  | FFTTPQVVEN  |
| Schizosaccharom | ACSNVAG--  | MSPGATAELN  | GEV--SPDR  | RLF EYNTKRV | FFMTPQTLQN  |
| Consistency     | 5654444000 | 4464443443  | 3322404543 | 5443534459  | 7849557644  |



|                 | 410        | 420        | 430         | 440         | 450        |
|-----------------|------------|------------|-------------|-------------|------------|
| Homo_sapiens    | VLKNGYLSLS | DINLLVFDEC | HLAIL-DHPY  | REIMKLCENC  | PS-----    |
| Bos_taurus      | VLKNGYLSLS | DINLLVFDEC | HLAIL-DHPY  | REIMKLCENC  | PS-----    |
| Mus_musculus    | VLKNGYLSLS | DINLLVFDEC | HLAIL-DHPY  | REIMKLCESC  | PS-----    |
| Gallus_gallus   | VLRNEYLSLS | NINLLVFDEC | HLAIQ-DHPY  | REIMKICEDY  | PS-----    |
| Xenopus_tropica | VLKSGNVSL  | NINLLVFDEC | HLAIQ-DHPY  | REIMKICESC  | QP-----    |
| Danio_rerio     | VLKNGVLP   | KINLLVFDEC | HLAIT-GHPY  | REIMKICEGC  | PS-----    |
| Caenorhabditis  | LIRHAYLKIE | DMCVLIFDEC | HHALGSQHPY  | RSIMVDYKLL  | KK--D---K  |
| Drosophila_mela | LLETRELLLS | SVELIVLEDC | HDSAV-YQRI  | RPLFENHIMP  | AP--P---A  |
| Oryza_sativa_Ja | ILRHSLIKMD | AIHLLILDEC | HHAVK-KHPY  | SLVMSEFYHT  | TP--K---E  |
| Arabidopsis_tha | ILRHSLIRME | TIDLILDEC  | HHAVK-KHPY  | SLVMSEFYHT  | TP--K---D  |
| Neurospora_cras | ALHHSWIRMD | QINLLIFDEA | HHTKK-DHPY  | ARI IKNFYID | E--QL---E  |
| Chaetomium_glob | CLTHSYIRMD | QVNLLVFDEA | HHTKK-NHPY  | ARI IKDFYAE | VKDLN---K  |
| Coccidioides_im | CLLHAFVKME | NINLLIFDEA | HNACK-DHPY  | ARIVKDFYLK  | D-G-N---A  |
| Aspergillus_nig | CLLNSYIKMS | QINILIFDEA | HHTKK-DHPY  | ARI IRDSYLE | E-V-Y---S  |
| Aspergillus_fum | CLLNSYVRMD | QINLLIFDEA | HHAKK-DHPY  | ARI IRDSYFK | A-Q-P---S  |
| Aspergillus_cla | CLLNSHVRMN | QINLLIFDEA | HHTKK-DHPY  | ARI IRDSYFK | A-S-P---P  |
| Phaeosphaeria_n | CMMHSFMSIS | RMNLLIFDEA | HHAKS-NHPY  | ARVMKDYYAH  | E-LDT---S  |
| Schizosaccharom | FLARGFLSIN | DLNLLIFDEC | HHAI G-NDAY | ARIMNDFYHR  | AKAVLSKKHF |
| Emericella_nidu | AMTHGFVRIS | RLGLLIFDEA | HH CIR-KHPT | NMIMRNFYHP  | ALQE--YGGP |
| Cryphonectria_p | ALLHGFVNIS | SLALMVFDEA | HH CNK-NHAY | SRVMKEFYWE  | SKTK--H--E |
| Neosartorya_fis | ALSHGFVKMS | RLALLIFDEA | HHCTR-RHAA  | NKIMRDFYHP  | TLTK--SGPG |
| Candida_albican | DLASGVVNPK | SIALLVIDEA | HRAKG-NYSY  | NNVVKFINRF  | SDS-----   |
| Kluyveromyces_l | DLKRGVLNPK | DVLLVIDEA  | HRARG-NYAY  | VELTKFIDRF  | NTS-----   |
| Schizosaccharom | DLKEHLDAK  | SIICLIFDEA | HRATG-NHSY  | AQVMRAVLRS  | NSH-----   |
| Consistency     | 4945547566 | 5858998996 | *474405868  | 5597644432  | 4210000001 |

|                 | 460         | 470        | 480         | 490        | 500        |
|-----------------|-------------|------------|-------------|------------|------------|
| Homo_sapiens    | -CPRILGLTA  | SIL--NGKCD | PEELEEEKIQK | LEKIL-KSNA | ETATD-LVVL |
| Bos_taurus      | -CPRILGLTA  | SIL--NGKCD | PEELEEEKIQK | LEKIL-KSNA | ETATD-LVVL |
| Mus_musculus    | -CPRILGLTA  | SIL--NGKCD | PEELEEEKIQK | LERIL-RSDA | ETATD-LVVL |
| Gallus_gallus   | -CPRILGLTA  | SIL--NGKCD | PAELEEEKIKK | LEKIL-KSNA | ETATD-LVVL |
| Xenopus_tropica | -CPRILGLTA  | SIL--NGKCD | PRDLEEEKIQK | LEEIL-RSNA | ETATD-LVVL |
| Danio_rerio     | -CPRILGLTA  | SIL--NGKCD | PCDLEEEKIQN | LEKIL-QSNA | ETATD-LVVL |
| Caenorhabditis  | PVPRVLGLTA  | SLI--KAKVA | PEKLMEQLKK  | LESAM-DSVI | ETASD-LVSL |
| Drosophila_mela | DRPRILGLAG  | PLH--SAGCE | LQQLSAMLAT  | LEQSV-LCQI | ETASD-IVTV |
| Oryza_sativa_Ja | KRPVAVFGMTA | SPVNLKGVTS | QEDCAIKIRN  | LESKL-DSVV | CTIKD-RKEL |
| Arabidopsis_tha | KRPAIFGMTA  | SPVNLKGVSS | QVDCAIKIRN  | LETKL-DSTV | CTIKD-RKEL |
| Neurospora_cras | RRPRILGLTA  | SPVD-AK--- | -VDPRAAAAE  | LEALL-HSQI | ATAAD-PAAL |
| Chaetomium_glob | RLRISRAMTA  | SPVD-AQ--- | IDPKIARSPE  | LEGLL-HSQI | ATVAD-PTAL |
| Coccidioides_im | KRPKIFGMTA  | SPVD-A---- | KMDVVKAARN  | LETLL-NSQI | ATASN-LSLL |
| Aspergillus_nig | KRPRIFGMTA  | SPID-T---- | KGDIVDEATR  | LEKLL-DSRI | ATTSN-MSLL |
| Aspergillus_fum | QRPRVFGMTA  | SPID-T---- | KGDITEAATR  | LETFL-DSRI | ATTSK-ITLL |
| Aspergillus_cla | QRPRIFGMTA  | SPID-T---- | KGDIIAAATR  | LETLL-DSRI | ATTSK-ITLL |
| Phaeosphaeria_n | KRPRIFAMTA  | SPVD-VKGQS | AEHVREAARE  | LETLL-HSRI | ATTSD-SALA |
| Schizosaccharom | TLPRIFGMTA  | SPF---TGK  | KGNLYHRLYQ  | WEQLF-DSKA | HVVS--ENEL |
| Emericella_nidu | AVPRILGLTA  | SAG-----   | --SSREGLQT  | IEMNL-NSVC | TTPQAHQEL  |
| Cryphonectria_p | PVPRILGLTA  | SPV---VR-  | --SDISSLKR  | LESTL-DAVC | RSPTRHREEL |
| Neosartorya_fis | AVPRIMGLTA  | SPV---VR-  | --SNHQELLT  | VESNL-DAVC | RTPRVHRQEL |
| Candida_albican | --YRILALTA  | -----T     | PASDVEGVQQ  | IIDNLSISKV | EVRTEQSIDI |
| Kluyveromyces_l | --YRLALTA   | -----T     | PAADLEGVQE  | VVNNLHISKI | ELRTEDSLDV |
| Schizosaccharom | --FRVLGLTA  | -----T     | PGSSTASVQK  | VVDCLHISKL | IVRNEESIDI |
| Consistency     | 1378868899  | 7341021112 | 3254354655  | 8844904846 | 4856504448 |

|                 | 510         | 520        | 530        | 540        | 550         |
|-----------------|-------------|------------|------------|------------|-------------|
| Homo_sapiens    | DRYTSQPCEI  | VVDC-----  | -----      | GPFT       | DRSGLYERLL  |
| Bos_taurus      | DRYTSQPCEI  | VVDC-----  | -----      | GPFT       | DRSGLYERLL  |
| Mus_musculus    | DRYTSQPCEI  | VVDC-----  | -----      | GPFT       | DRSGLYERLL  |
| Gallus_gallus   | DRYTSQPCEI  | VVDC-----  | -----      | GPYT       | DKSGLYGRLL  |
| Xenopus_tropica | DRYASQPCEI  | VLDC-----  | -----      | GPYI       | DKSGLYQRLL  |
| Danio_rerio     | DRYASQPREE  | VLDC-----  | -----      | GQYQ       | DQSGLSERLL  |
| Caenorhabditis  | SKYGAKPYEV  | VIIC-----  | -----      | KD-F       | EIGCLGIPNF  |
| Drosophila_mela | LRYC SRPHEY | IVQC-----  | -----      | AP-F       | EMDELSLVLA  |
| Oryza_sativa_Ja | EKHVPMPLEV  | VVQYDKAATL | WSLHEQIKQM | ESTVEEAALS | SSKRTKWQFM  |
| Arabidopsis_tha | EKHVPMPSEI  | VEYDKAATM  | WSLHETIKQM | IAAVEEAAQA | SSRKS KWQFM |
| Neurospora_cras | QHTICKPKTE  | LVVE-----  | -----      | -----      | YVRGR       |
| Chaetomium_glob | HNSSTKLKRE  | VTVE-----  | -----      | -----      | YGKCL       |
| Coccidioides_im | RQSVPRP-NE  | EVWS-----  | -----      | -----      | YDRLD       |
| Aspergillus_nig | RQVARRP-VE  | RVWS-----  | -----      | -----      | FNKLE       |
| Aspergillus_fum | REVVS RP-IE | KVWA-----  | -----      | -----      | YNRLE       |
| Aspergillus_cla | RQVVS RP-IE | KVWA-----  | -----      | -----      | YDRLE       |
| Phaeosphaeria_n | RNSITRP-EE  | EVAV-----  | -----      | -----      | YTRLR       |
| Schizosaccharom | ADYFCLPEES  | YVMY-----  | -----      | SNK--      | LVVPPSDSI   |
| Emericella_nidu | LEYTHMPELR  | RVLY-----  | -----      | TPL--      | MKENASLWE   |

|                 |            |      |         |            |             |            |            |
|-----------------|------------|------|---------|------------|-------------|------------|------------|
| Cryphonectria_p | IANSQRPALF | SIY  | -----   | -----      | -----       | NPKLQ      | PYAAGFSESL |
| Neosartorya_fis | VKFTHRPHLQ | QIY  | -----   | -----      | -----       | TPTDP      | AGFKSASQTL |
| Candida_albican | VRHMKRKTVE | RKTC | -----   | -----      | -----       | YPSS       | EITECIELLA |
| Kluyveromyces_l | ARYMMRRDRE | MIEI | -----   | -----      | -----       | GLIP       | EIEEVVEQIG |
| Schizosaccharom | RSYVFHKKIQ | LIKV | -----   | -----      | -----       | TISS       | EMNILKSDFA |
| Consistency     | 3554457144 | 4834 | 0000000 | 0000000000 | 00000002111 | 2121243554 |            |

|                 |                 |             |            |            |            |
|-----------------|-----------------|-------------|------------|------------|------------|
|                 | ..... 560 ..... | 570 .....   | 580 .....  | 590 .....  | 600        |
| Homo_sapiens    | MELEEEALNFI     | ND          | C          | NISVHSK    | ERDSTLISKQ |
| Bos_taurus      | MELEEEALNFI     | ND          | C          | NISVHSK    | ERDSTLISKQ |
| Mus_musculus    | MELEAALDFI      | ND          | C          | NVAVHSK    | ERDSTLISKQ |
| Gallus_gallus   | RELDEALHFL      | ND          | C          | NISVHSK    | ERDSTLISKQ |
| Xenopus_tropica | NELDEALNFI      | ID          | C          | NISTHSC    | ERDSTLISKQ |
| Danio_rerio     | NELDEALNFI      | ND          | C          | NLSVHRE    | DRDPTFISKQ |
| Caenorhabditis  | DTVIEIFDET      | VA          | FVNT       | TTEFHDPDL  | LDPRRPIKD  |
| Drosophila_mela | DVLNTHKSFL      | LD          | HRYPYIY    | TDQFMDELKD | IPDPKVDPLN |
| Oryza_sativa_Ja | GARDAGSRDE      | LR          | L          | VYGVSERT   | ESDGAANLIQ |
| Arabidopsis_tha | GARDAGAKDE      | LR          | Q          | VYGVSERT   | ESDGAANLIH |
| Neurospora_cras | PDSETVLNKQ      | LR          | K          | LV         | GGQELFKK   |
| Chaetomium_glob | PEFETGLNRA      | LK          | D          | LV         | GEHRLFKK   |
| Coccidioides_im | QPFETRLYKE      | LR          | S          | RF         | GDLRALEK   |
| Aspergillus_nig | QPFATSLYKH      | LE          | D          | RF         | GDMACLEG   |
| Aspergillus_fum | PPFATELYKL      | MD          | T          | RY         | GNIKVLEG   |
| Aspergillus_cla | SPFKTNLHKL      | ME          | N          | RF         | GNVKALEG   |
| Phaeosphaeria_n | NEFETPLHQK      | VK          | A          | KY         | GDVAPFRK   |
| Schizosaccharom | IKKCEETLQG      |             |            |            | CKLISR     |
| Emericella_nidu | GSTLQKLLER      | D           |            |            | NTYCSGQMK  |
| Cryphonectria_p | TKLMAARNKL      | NILEDPPYVVS | LRAEISDRSR | RKLEKAIKEK | RTYVQDTMKS |
| Neosartorya_fis | GALYHAWETL      | DIGDDPYIQR  | LRKSPLDDTA | LKKALL     | KTTCREQLRR |
| Candida_albican | EGITPVLNTA      | KE          | R          | GLL-DLT    | DPTRINFLQC |
| Kluyveromyces_l | IAIAPVLQEA      | IQ          | L          | GIY-ESC    | EPHQINAFVA |
| Schizosaccharom | NLYRPYFNFL      | RQ          | K          | KLIPINC    | ECLNIKAYTL |
| Consistency     | 3444446434      | 000000034   | 2000000000 | 0012111111 | 2133433454 |

|                 |                 |            |            |            |                |
|-----------------|-----------------|------------|------------|------------|----------------|
|                 | ..... 610 ..... | 620 .....  | 630 .....  | 640 .....  | 650            |
| Homo_sapiens    | ILSDCRAVLV      | VLGPWCADKV | AGMMVRELQK | YIKHEQ-EEL | HRKFLFLFTDT    |
| Bos_taurus      | ILSDCRAVLV      | VLGPWCADKV | AGMMVRELQK | HIKHEQ-EEL | HRKFLFLFTDT    |
| Mus_musculus    | ILSDCRAVLV      | VLGPWCADKV | AGMMVRELQK | YIKHEQ-EEL | HRKFLFLFTDT    |
| Gallus_gallus   | ILSDCRAVLV      | VLGPWCADKV | AGMMVRELQK | YIKHEQ-EEL | HRKFLFLFTDT    |
| Xenopus_tropica | ILSDCQTVLL      | VLGPWCADKV | AGMMVRELQK | YIKHEQ-EEL | HRKFLFLFTDT    |
| Danio_rerio     | VLNDCRAVLT      | VLGPWCADKA | AGIMVRELQK | YIKHEQ-EEL | NRKFLFLFTDT    |
| Caenorhabditis  | SLKTTRAVFR      | QLGPWAAWRT | AQVWEKELGK | IKSQVLPDK  | TLRFLNMAKT     |
| Drosophila_mela | VINSLLVVLH      | EMGPWCQTRA | AHHFYQCNEK | LKVK-TPHER | HYLLYCLVST     |
| Oryza_sativa_Ja | KLRAINYLALG     | ELGQWCAYKV | AQSFLTALQN | DER----    | AN YQVDVKFQES  |
| Arabidopsis_tha | KLRAINYLTLA     | ELGQWCAYKV | GQSFLSALQS | DER----    | VN FQVDVKFQES  |
| Neurospora_cras | PLNFTTSAAS      | KLGTWCADRY | WQLFFKQEDI | VKL----    | ES RTERDLMKV-  |
| Chaetomium_glob | PFAFTATAAS      | ELGPWCADRY | WQLFFRGEEV | VKL----    | EA KTEREILRK-  |
| Coccidioides_im | LFTFSLKASS      | NLGAWCADWV | WSYALTEESL | PKL----    | EG RAARTAMGNL  |
| Aspergillus_nig | IFRFWQASS       | ELGRWCSDRA | WARALADDVL | PKL----    | EG SVRKTANSET  |
| Aspergillus_fum | VYRFWQASS       | ELGRWCSDRA | WWHALADDVL | PKL----    | EG NINKLIESNT  |
| Aspergillus_cla | VYRFWQASS       | ELGRWCSDRA | WLYALADDVL | PKL----    | EG HVNKLAEASTA |
| Phaeosphaeria_n | LFITAKLHAS      | ELGRWASDMY | WSFAFADEQS | RKL----    | QI REELKYNRSK  |
| Schizosaccharom | AVKTALAETI      | DMGLWFGQV  | WLYLVDFVET | K-----     | RLKKKALGKQ     |
| Emericella_nidu | FVCKAVHIFQ      | ELGIWAAEYF | IRASVEELLS | H-----     | AYVHSEKIDLD    |
| Cryphonectria_p | FCRRSMEMAK      | ELGAWAADWF | ISEAIRLFLA | G-----     | IYRQGAS---     |
| Neosartorya_fis | FVDRSRHIFE      | ELGEWAAEYF | IYASIKQLGD | R-----     | VRNSYMSGDW     |
| Candida_albican | MEISRKIVAN      | PT-IPEGLKW | SNFYILQLLG | MV-----    | G QCYRRLNIYG   |
| Kluyveromyces_l | MQQSQKIILN      | PS-IPEGLKW | KNFFILQLLS | QV-----    | G HMYRRLRIYG   |
| Schizosaccharom | FVSLRKYSFS      | SKNVQSKEKS | KIMSCFTLLI | SC-----    | A HITYLLDCHG   |
| Consistency     | 4543433554      | 5773757554 | 3344644444 | 3320000032 | 4343443333     |

|                 |                 |            |            |            |            |
|-----------------|-----------------|------------|------------|------------|------------|
|                 | ..... 660 ..... | 670 .....  | 680 .....  | 690 .....  | 700        |
| Homo_sapiens    | FLRKIHALLCE     | EHFS       | PASLDLKF   | VTPKVIKLE  | ILRKYKPYER |
| Bos_taurus      | FLRKIHALLCE     | EHFS       | PASLDLKF   | VTPKVIKLE  | ILRKYKPYER |
| Mus_musculus    | LLRKIHALLCE     | EYFS       | PASLDLKY   | VTPKVMKLE  | ILRKYKPYER |
| Gallus_gallus   | FLRKIHALLCE     | EHFS       | PASLDLKF   | VTPKVIKLE  | ILRKYKPYER |
| Xenopus_tropica | ILRKIHALLCE     | EHFS       | PASLDMKF   | VTPKVIKLE  | ILRKYKPYER |
| Danio_rerio     | ILRKIHALLCE     | EHFS       | PASLDLKF   | VTPKVIRLLE | ILHEYKPFER |
| Caenorhabditis  | SMITIKRLLE      | PEMKKIK    | SIEALRPY   | VPQVRIRLFE | ILETFN---- |
| Drosophila_mela | ALIQLYSLCE      | HAFHRHLGSG | SDSRQTIERY | SSPKVRRLLQ | TLRCFKPEEV |
| Oryza_sativa_Ja | YLKKVVDLLH      | CQLT       | EGAAMKSE   | TSDVEMQNT  | KHNTNDLEEG |
| Arabidopsis_tha | YLSEVVSLLQ      | CELL       | EGAAAEKV   | A-AEVGKPEN | GNAHDEMEEG |
| Neurospora_cras | AALDEITEK       | HV         |            | KQVREAEH   | LVNAHTFSPA |
| Chaetomium_glob | SAYSQEIAA       | QV         |            | NKVREAEH   | LVGQH--EFA |
| Coccidioides_im | PIAKIVRPEA      | EI         |            | QRIREASE   | IIRSHKFGDP |

|                 | 810    | 820       | 830         | 840        | 850        |
|-----------------|--------|-----------|-------------|------------|------------|
| Homo_sapiens    | PFTNI  | LCGIIFVE  | RRYTAVVLNR  | LIKEAGKQDP | ELAYISSNFI |
| Bos_taurus      | PFTNI  | LCGIIFVE  | RRYTAVVLNR  | LIKEAGKQDP | ELAYISSNFI |
| Mus_musculus    | PFTNI  | LCGIIFVE  | RRYTAVVLNR  | LIKEAGKQDP | ELAYISSNFI |
| Gallus_gallus   | PFTNI  | LCGIIFVE  | RRYTAVVLNR  | LIKEAGKQDP | ELAYISSNFI |
| Xenopus_tropica | PFTNI  | LCGIIFVE  | RRYTAVVLNR  | LIKEAGKQDP | ELAYISSNFI |
| Danio_rerio     | PFTNI  | LCGIIFVE  | RRYTAVVLNR  | LIKEAGKQDP | ELAYISSNFI |
| Caenorhabditis  | EKA EH | LSA IIFVD | ORV IAYSLLL | MMRHIKSWEP | KFKFVNPDYV |



|                 |            |             |            |            |            |
|-----------------|------------|-------------|------------|------------|------------|
| Drosophila_mela | RHHRDHNDGS | DTLCALIIYCN | QNHTARVLF  | LLAEISRRDP | DLKFLRCQYT |
| Oryza_sativa_Ja | TED        | FRAIIFVE    | RVVTALVLPK | VLAELP     | SLSFIRCASL |
| Arabidopsis_tha | TAD        | FRAIIFVE    | RVVAALVLPK | VFAELP     | SLSFIRCASM |
| Neurospora_cras | GVGA       | QRCIIFVR    | QRNTAMLAD  | LLQQPEI-KS | HIPSIAAEVL |
| Chaetomium_glob | VDHK       | RRCIVFVR    | QRNVASLLTD | LLQQPE--M  | RIPGLEPGIL |
| Coccidioides_im | RHTD       | TKCIVFTE    | QRHTARILCD | LFSRI      | GTKHLRPGVL |
| Aspergillus_nig | RQTE       | TKCIVFTQ    | KRYTALILAE | LFQTL      | NIPFLRPGVL |
| Aspergillus_fum | DTTG       | TKCIVFTQ    | KRYTAKILNE | LFTVL      | NIPNLRPGVL |
| Aspergillus_cla | HAPE       | TKCIIFTQ    | KRYTAKTLHE | LFTIL      | SIPHLRPGVL |
| Phaeosphaeria_n | RTTL       | ARCIVFVE    | KRHTAQLLKL | IFDHI      | GGPNLHCDVL |
| Schizosaccharom | SDS        | VRTVIFVE    | RKATAFTLSL | FMKTLNL    | --PNIRAHSF |
| Emericella_nidu | DIN        | FSGLIFVE    | QRAAVTVMSY | LLSTHPS    | TRDRFRTGSF |
| Cryphonectria_p | K-D        | ARAICFVK    | ERATTVVLSH | ILTTHPE    | VSSKFRIGTM |
| Neosartorya_fis | ERE        | FSGLIFVK    | QRATVSAMTS | LLSVHPC    | TRERFRCAAY |
| Candida_albican | HET-AG     | SRVIFTE     | FRESALEIVQ | CIEKA      | -NDNRKPHIF |
| Kluyveromyces_l | A-P-SD     | SRAIIFTE    | LRESALEIVK | SIDIL      | NDGALRPHIF |
| Schizosaccharom | TSEGYQN    | QRVMIFTE    | FRNTAEYITT | TLLAI      | -RPMVRASLF |
| Consistency     | 3242000000 | 0044498977  | 5747845834 | 7644411011 | 3443764446 |

|                 |            |            |            |            |            |
|-----------------|------------|------------|------------|------------|------------|
|                 | 860        | 870        | 880        | 890        | 900        |
| Homo_sapiens    | TGHGIGKNQ  |            |            |            |            |
| Bos_taurus      | TGHGIGKNQ  |            |            |            |            |
| Mus_musculus    | TGHGIGKNQ  |            |            |            |            |
| Gallus_gallus   | TGHGIGKNQ  |            |            |            |            |
| Xenopus_tropica | TGHGIGKNQ  |            |            |            |            |
| Danio_rerio     | TGHSIGKNQ  |            |            |            |            |
| Caenorhabditis  | VGASGR-NL  |            |            |            |            |
| Drosophila_mela | TDRVAD-PT  |            |            |            |            |
| Oryza_sativa_Ja | IGHNN-N    |            |            |            |            |
| Arabidopsis_tha | IGHNN-S    |            |            |            |            |
| Neurospora_cras | VGGGT-TG   |            |            |            |            |
| Chaetomium_glob | VGGGR-PE   |            |            |            |            |
| Coccidioides_im | IGVRS-DA   |            |            |            |            |
| Aspergillus_nig | IGVRS-GD   |            |            |            |            |
| Aspergillus_fum | IGVRP-GD   |            |            |            |            |
| Aspergillus_cla | IGVRS-GD   |            |            |            |            |
| Phaeosphaeria_n | VGINN-RA   |            |            |            |            |
| Schizosaccharom | IGHGPS     |            |            |            |            |
| Emericella_nidu | IGMSNSTNR  |            |            |            |            |
| Cryphonectria_p | VGTSFVPGV  |            |            |            |            |
| Neosartorya_fis | VGWSNGSAS  |            |            |            |            |
| Candida_albican | IGQSKEKEKF | DVENFGKKKQ | KGQTKKKKDE | RPSTRSSS   |            |
| Kluyveromyces_l | IGQAKGKEHF | DEETYIRKNK | PKGRTKAARL | RRIEEENRVE | EEKKRQKEQA |
| Schizosaccharom | IGQAN      |            |            |            |            |
| Consistency     | 7934311420 | 0000000000 | 0000000000 | 0000000000 | 0000000000 |

|                 | 910        | 920        | 930         | 940        | 950         |
|-----------------|------------|------------|-------------|------------|-------------|
| Homo_sapiens    | -----      | --PRNKQMEA | EFRKQEEVLR  | KFRAHETNLL | IATSIIVEEGV |
| Bos_taurus      | -----      | --PRNKQMEA | EFRKQEEVLR  | KFRAHETNLL | IATSIIVEEGV |
| Mus_musculus    | -----      | --PRSKQMEA | EFRKQEEVLR  | KFRAHETNLL | IATSVVEEGV  |
| Gallus_gallus   | -----      | --PRNKQMEV | EFRKQEEVLR  | KFRAHETNLL | IATSIIVEEGV |
| Xenopus_tropica | -----      | --PRNKQMEV | EFRKQEEVLR  | KFRAHETNLL | IATSIIVEEGV |
| Danio_rerio     | -----      | --PRNKQMEV | EFRKQEEVLR  | KFRAHETNLL | IATSIIVEEGV |
| Caenorhabditis_ | -----      | --AS-SDSQG | LHKRQTEVLR  | RFHRNEINCL | IATSVLEEGV  |
| Drosophila_mela | -----      | --TEPKEAEL | EHRRQEEVLK  | RFRMHDCNVL | IGTSVLEEGI  |
| Oryza_sativa_Ja | -----      | -----QEM   | RACQMQDTIS  | KFRDGRVTLL | VATSVAAEGL  |
| Arabidopsis_tha | -----      | -----QEM   | KSSQMQDTIS  | KFRDGHVTLL | VATSVAAEGL  |
| Neurospora_cras | -----      | --SSYVNAKI | NFQQQNRRIIR | KFKLGEINCL | FATSVAAEGL  |
| Chaetomium_glob | -----      | --ASYDNAKV | TYRDQVLTII  | KFKKGELNCI | FATSVAAEGL  |
| Coccidioides_im | -----      | --SGG--MNI | SFRQQVLAVV  | SFRKGEVNCL | FATSVAAEGL  |
| Aspergillus_nig | -----      | --LAG--MNI | TFRQQFISLV  | KFRTGEINCL | FATSVAAEGL  |
| Aspergillus_fum | -----      | --IGG--MNI | TFRQQFLALV  | KFRTGEINCL | FATSVAAEGL  |
| Aspergillus_cla | -----      | --IGG--MNI | TFRQQFLALV  | KFRKGEINCL | FATSVAAEGL  |
| Phaeosphaeria_n | -----      | --GE--ENV  | SLRSQILTLQ  | KFRRGELNCL | FATSVAAEGL  |
| Schizosaccharom | -----      | --DQGEFSM  | TFRRQKDTLH  | KFKTGKYNVL | IATAVAEEGI  |
| Emericella_nidu | -----      | --KTMLGDLI | SAKMQPDITD  | DFRYGRKNLI | VATDVLKEGI  |
| Cryphonectria_p | -----      | --KRDF-LDI | PETGGSQCLE  | AFREGRKNML | VATSVLEEGI  |
| Neosartorya_fis | -----      | --KDILGDLI | NMQLQRDTLD  | DFRSGRKNLI | IATDVLKEGI  |
| Candida_albican | -----      | --ENAQMTGM | SQKLQKEI IK | KFKKGVFNIL | VATSIGEEGL  |
| Kluyveromyces_l | KLERTGRRTG | SSEEAQLSGM | NQKQKKVIS   | DFKKGIYNVL | VCTSIGEEGL  |
| Schizosaccharom | -----      | --SAYSTGM  | NQMQQKETID  | QFRAGVINTL | VATSIGEEGL  |
| Consistency     | 0000000000 | 0023222446 | 4465844684  | 6*84654959 | 79*8959**8  |

|              |            |            |            |            |      |
|--------------|------------|------------|------------|------------|------|
|              | 960        | 970        | 980        | 990        | 1000 |
| Homo_sapiens | DIPKCNLVVR | FDLPTEYRSY | VQSKGR-ARA | PISNYIMLAD |      |



|                 |             |             |            |            |            |
|-----------------|-------------|-------------|------------|------------|------------|
| Bos_taurus      | DIPKCNLVVR  | FDLPT EYRSY | VQSKGR-ARA | PISNYVMLAD | -----      |
| Mus_musculus    | DIPKCNLVVR  | FDLPT EYRSY | VQSKGR-ARA | PISNYVMLAD | -----      |
| Gallus_gallus   | DIPKCNLVVR  | FDLPT EYRSY | VQSKGR-ARA | PISNYIMLAD | -----      |
| Xenopus_tropica | DIPKCNLVVR  | FDLPT EYRSY | VQSKGR-ARA | PISNYIMLAD | -----      |
| Danio_rerio     | DIPKCNLVVR  | FDLPT EYRSY | VQSKGR-ARA | PVSNYIMLAD | -----      |
| Caenorhabditis  | DVKQCNLVIK  | FDRPLDMRSY  | VQSKGR-ARR | AGSRYVITVE | -----      |
| Drosophila_mela | DVPKCNLVVR  | WDPPTTYRSY  | VQCKGR-ARA | APAYHVILVA | PSYKSPTVGS |
| Oryza_sativa_Ja | DIRQCNVVIR  | FDLAKTVLAY  | IQSRGR-ARK | PGSDYILMLE | -----      |
| Arabidopsis_tha | DIRQCNVVMR  | FDLAKTVLAY  | IQSRGR-ARK | PGSDYILMVE | -----      |
| Neurospora_cras | DIPDCNIVIR  | FDLYDTLIQC  | IQSRGR-ARR | PDSRYIQMIE | -----      |
| Chaetomium_glob | DIPDCNVIIR  | YDLNNTLIQY  | IQSRGR-ARQ | EGSIYIHMVE | -----      |
| Coccidioides_im | DIPDCNLIVR  | FDLASTLTQY  | IQSRGR-ARH | MNSTFAHLVE | -----      |
| Aspergillus_nig | DIPDCNLVVR  | FDLYQTLIQY  | VQSRGR-ARH | FNSTYASMVE | -----      |
| Aspergillus_fum | DIPDCNLVIR  | FDLYRTLIQY  | VQSRGR-ARH | CTSTYAIMVE | -----      |
| Aspergillus_cla | DIPDCNLVVR  | FDLYHTLIQY  | VQSRGR-ARH | YHSTYASMVE | -----      |
| Phaeosphaeria_n | DIPQCNLVVR  | FDLYRTMIGY  | VQSRGR-ARH | RNSKYLHMLE | -----      |
| Schizosaccharom | DVPSCNLVIR  | FNICRTVTQY  | VQSRGR-ARA | MASKFLIFLN | -----      |
| Emericella_nidu | DVSACSVVIC  | YNIPKGFESF  | IQRRGR-ARR | QNSTYSMMLS | -----      |
| Cryphonectria_p | DVPACNLIIC  | FDKPNNLRAF  | IQRRGR-ARM | RQSHLYLFVE | -----      |
| Neosartorya_fis | DISACSVVVC  | YDKPPNLKSF  | VQRRGR-ARR | KQSTFAIMFP | -----      |
| Candida_albican | DIGEVDLIIC  | YDSTSSPIKN  | IQRMGRTGRK | RDGKVLMLFS | -----      |
| Kluyveromyces_l | DIGEVDLIIC  | FDSTSSPIKN  | IQRMGRTGRK | RDGRIVLLFS | -----      |
| Schizosaccharom | DIGD TDMIIC | YDASSSPIRT  | IQRMGRTGRK | KSGKVFVLLT | -----      |
| Consistency     | *955888996  | 8964454466  | 9*67**08*4 | 3384765756 | 0000000000 |

|                 | ..... 1010..... 1020..... 1030..... 1040..... 1050 |
|-----------------|----------------------------------------------------|
| Homo_sapiens    | -----                                              |
| Bos_taurus      | -----                                              |
| Mus_musculus    | -----                                              |
| Gallus_gallus   | -----                                              |
| Xenopus_tropica | -----                                              |
| Danio_rerio     | -----                                              |
| Caenorhabditis  | -----                                              |
| Drosophila_mela | VQLTDRSHRY                                         |
| Oryza_sativa_Ja | -----                                              |
| Arabidopsis_tha | -----                                              |
| Neurospora_cras | -----                                              |
| Chaetomium_glob | -----                                              |
| Coccidioides_im | -----                                              |
| Aspergillus_nig | -----                                              |
| Aspergillus_fum | -----                                              |
| Aspergillus_cla | -----                                              |
| Phaeosphaeria_n | -----                                              |
| Schizosaccharom | -----                                              |
| Emericella_nidu | -----                                              |
| Cryphonectria_p | -----                                              |
| Neosartorya_fis | -----                                              |
| Candida_albican | -----                                              |
| Kluyveromyces_l | -----                                              |
| Schizosaccharom | -----                                              |
| Consistency     | 0000000000                                         |

|                 |            |            |            |            |            |      |
|-----------------|------------|------------|------------|------------|------------|------|
|                 | .....      | 1060.....  | 1070.....  | 1080.....  | 1090.....  | 1100 |
| Homo_sapiens    | -          | -          | -          | -          | -          | -    |
| Bos_taurus      | -          | -          | -          | -          | -          | -    |
| Mus_musculus    | -          | -          | -          | -          | -          | -    |
| Gallus_gallus   | -          | -          | -          | -          | -          | -    |
| Xenopus_tropica | -          | -          | -          | -          | -          | -    |
| Danio_rerio     | -          | -          | -          | -          | -          | -    |
| Caenorhabditis  | -          | -          | -          | -          | -          | -    |
| Drosophila_mela | NPEVFSKQPP | TACDIKLQEI | QDELPAAAQL | DTSNSSDEAV | SMSNTSPSES |      |
| Oryza_sativa_Ja | -          | -          | -          | -          | -          | -    |
| Arabidopsis_tha | -          | -          | -          | -          | -          | -    |
| Neurospora_cras | -          | -          | -          | -          | -          | -    |
| Chaetomium_glob | -          | -          | -          | -          | -          | -    |
| Coccidioides_im | -          | -          | -          | -          | -          | -    |
| Aspergillus_nig | -          | -          | -          | -          | -          | -    |
| Aspergillus_fum | -          | -          | -          | -          | -          | -    |
| Aspergillus_cla | -          | -          | -          | -          | -          | -    |
| Phaeosphaeria_n | -          | -          | -          | -          | -          | -    |
| Schizosaccharom | -          | -          | -          | -          | -          | -    |
| Emericella_nidu | -          | -          | -          | -          | -          | -    |
| Cryphonectria_p | -          | -          | -          | -          | -          | -    |
| Neosartorya_fis | -          | -          | -          | -          | -          | -    |
| Candida_albican | -          | -          | -          | -          | -          | -    |

|                 |                   |                   |                   |                   |                     |
|-----------------|-------------------|-------------------|-------------------|-------------------|---------------------|
| Kluyveromyces_l | -----             | -----             | -----             | -----             | -----               |
| Schizosaccharom | -----             | -----             | -----             | -----             | -----               |
| Consistency     | 0 0 0 0 0 0 0 0 0 | 0 0 0 0 0 0 0 0 0 | 0 0 0 0 0 0 0 0 0 | 0 0 0 0 0 0 0 0 0 | 0 0 0 0 0 0 0 0 0   |
|                 | ..... 1110.       | ..... 1120.       | ..... 1130.       | ..... 1140.       | ..... 1150          |
| Homo_sapiens    | -----             | -----             | -----             | TDKIK             | SFEEDLKTYK          |
| Bos_taurus      | -----             | -----             | -----             | TDKIK             | SFEEDLKTYK          |
| Mus_musculus    | -----             | -----             | -----             | TDKIK             | SFEEDLKTYK          |
| Gallus_gallus   | -----             | -----             | -----             | TDKIK             | SFEEDLKTYK          |
| Xenopus_tropica | -----             | -----             | -----             | SDKIK             | AFEEDLKTYK          |
| Danio_rerio     | -----             | -----             | -----             | SERTK             | TFQEDLKTYK          |
| Caenorhabditis  | -----             | -----             | -----             | EKDTA             | AYCSKL-PSD          |
| Drosophila_mela | STEQKSRRFQ        | CELSLTEPE         | DTSDTTAEID        | TAHSLASTTK        | DLVHQMAQYR          |
| Oryza_sativa_Ja | -----             | -----             | -----             | RGNI              | SHETFLRNAR          |
| Arabidopsis_tha | -----             | -----             | -----             | RGNV              | SHAAFLRNAR          |
| Neurospora_cras | -----             | -----             | -----             | KGNY              | EHHSRILRAK          |
| Chaetomium_glob | -----             | -----             | -----             | SENE              | EHVKKVCQNQ          |
| Coccidioides_im | -----             | -----             | -----             | RDNF              | VHRESVNHLQ          |
| Aspergillus_nig | -----             | -----             | -----             | RGNL              | EHEQRLLEVQ          |
| Aspergillus_fum | -----             | -----             | -----             | KDNA              | EHEGRLKEIR          |
| Aspergillus_cla | -----             | -----             | -----             | KDNS              | DHEARLREVR          |
| Phaeosphaeria_n | -----             | -----             | -----             | AENK              | ENTERLMNAR          |
| Schizosaccharom | -----             | -----             | -----             | TE                | ELLIHERILH          |
| Emericella_nidu | -----             | -----             | -----             | TE                | DDGSTLDKWQ          |
| Cryphonectria_p | -----             | -----             | -----             | -----             | DEAEADWE            |
| Neosartorya_fis | -----             | -----             | -----             | TD                | DASADVSKWQ          |
| Candida_albican | -----             | -----             | -----             | S-NEES            | KFDKAMGGYE          |
| Kluyveromyces_l | -----             | -----             | -----             | G-NEKF            | KFEQAMNDYE          |
| Schizosaccharom | -----             | -----             | -----             | EDCEDS            | KWERSQVSYR          |
| Consistency     | 0 0 0 0 0 0 0 0 0 | 0 0 0 0 0 0 0 0 0 | 0 0 0 0 0 0 0 0 0 | 0 0 0 0 0 3 3 4 3 | 4 4 4 5 4 6 3 4 4 6 |

|                 |                     |                     |                     |                     |                     |
|-----------------|---------------------|---------------------|---------------------|---------------------|---------------------|
|                 | ..... 1160.         | ..... 1170.         | ..... 1180.         | ..... 1190.         | ..... 1200          |
| Homo_sapiens    | AIEKILRNKC          | SKSVDTGETD          | IDPVMDDDDV          | FPPYV---            | L RPDDGGPRVT        |
| Bos_taurus      | AIEKILRNKC          | SKSVDTGEAD          | TEPVVDDDDV          | FPPYV---            | L R-PEDGPRVT        |
| Mus_musculus    | AIEKILRNKC          | SKSADGAED           | VHAGVDDEDA          | FPPYV---            | L RPDDGGPRVT        |
| Gallus_gallus   | AIEKILRNKC          | SKSVDTSETE          | TEPIVDDDDV          | FPPYV---            | L RTDENS PRVT       |
| Xenopus_tropica | AIEKILRNKC          | SKSIDCGNTE          | SEPIVDDDEI          | FPPYV---            | L RQDDGSPRVT        |
| Danio_rerio     | AIEKILRNKC          | SKSAECNDFE          | LEPVTDDDNV          | LPPYV---            | L RSEDGGPRVT        |
| Caenorhabditis  | IFTRLVPHNQ          | IIPIE----           | -----               | -----               | -----ENGVT          |
| Drosophila_mela | EIEQMMLLSKC         | ANTEPPEQEQ          | SEAERFSACL          | AAYRP---            | K PHLLTGASVD        |
| Oryza_sativa_Ja | NSEETLRKEA          | MERTDLSHLD          | GTSVLSVPDT          | SPGSM---            | Y QVESTGAVVS        |
| Arabidopsis_tha | NSEETLRKEA          | IERTDLSHLK          | DTSRLISIDA          | VPGTV---            | Y KVEATGAMVS        |
| Neurospora_cras | GAEDVLRKFC          | EALPEDRKLT          | GNNMNL DYLL         | RKEKGKRQ-Y          | TVPDTGAKLS          |
| Chaetomium_glob | ESEDALRKFC          | EALPADRKLT          | GNNFDM EYFL         | RKEKDQRQ-Y          | TVPETGARLN          |
| Coccidioides_im | SSEEIMKRFC          | ISLPKDRILN          | --SDDVDALY          | ESDRNRKS-Y          | TVQTTGAKLT          |
| Aspergillus_nig | DAEMMQSFCR          | TLP-EDRLLY          | GFDHDLDTVL          | QKDEGNRT-F          | RIKSTGAKLT          |
| Aspergillus_fum | EAENIMRRFC          | EILPEDRILH          | GNDHDLDSFL          | QEEGRRT-F           | TVKSTGAKLT          |
| Aspergillus_cla | EAEKTMQNFC          | ETLPEDRILH          | GNDHDLDSLL          | QHEGRRT-F           | TVKSTGARLT          |
| Phaeosphaeria_n | HDENIMREFC          | KDLTHDRQLG          | DVEQEKAELI          | ALEDKLFPSY          | TDEKSGAKLT          |
| Schizosaccharom | EEKNLKFALS          | ELSNSNIFDS          | LVCEERERVT          | DDIV-----           | Y EVGETGALLT        |
| Emericella_nidu | KFEKIMEEAC          | LEDRRRTEEL          | RALGSLDEDV          | CT-R-----           | F CVRSTGAILT        |
| Cryphonectria_p | ALEAQMKLQY          | EDEKREHERL          | EAIENSEALD          | YP EE-----          | L RVESTGARLT        |
| Neosartorya_fis | DLEQAMIEAY          | QDDERQLQSV          | SALE-SLDEE          | VMER-----           | L TVESTSAVLT        |
| Candida_albican | YIQQHIMKGD          | FIQLRP-QHR          | MIPDEYKPEA          | VKQLI-----          | Q IPEENIELKA        |
| Kluyveromyces_l | NLQTAITHNA          | L-EYTK-SDR          | ILPPNVQPKC          | EEKFI-----          | I ISNENDEVNK        |
| Schizosaccharom | RVQKVIESGK          | KIALKKDVPR          | LIPSNIQPIF          | KFQAL-----          | Q NNADATLILN        |
| Consistency     | 4 4 8 5 5 7 5 4 3 5 | 4 3 4 3 4 3 3 3 3 3 | 2 3 3 3 3 3 5 3 3 4 | 3 3 3 3 2 0 0 0 0 4 | 4 3 4 5 5 6 5 4 7 7 |

|                 |             |             |             |             |                |
|-----------------|-------------|-------------|-------------|-------------|----------------|
|                 | ..... 1210. | ..... 1220. | ..... 1230. | ..... 1240. | ..... 1250     |
| Homo_sapiens    | INTAIGHINR  | YCARLPSPDPF | THLAPKCRTR  | ELP-----    | D G---TFYSTL   |
| Bos_taurus      | INTAIGHVNR  | YCARLPSPDPF | THLAPKCRTR  | ELP-----    | D G---TFYSTL   |
| Mus_musculus    | INTAIGHINR  | YCARLPSPDPF | THLAPKCRTR  | ELP-----    | D G---TFYSTL   |
| Gallus_gallus   | INTAIGHINR  | YCARLPSPDPF | THLAPKCKTR  | ELP-----    | D H---TFYSTL   |
| Xenopus_tropica | INTAIGHINR  | YCARLPSPDPF | THLAPKCKTR  | EFP-----    | D G---LYRSTL   |
| Danio_rerio     | MNTAIGHVNR  | YCARLPSPDPF | THLAPKCKTV  | EMN-----    | T G---GYRSTL   |
| Caenorhabditis  | -----       | -----       | -----       | -----       | -----KYCAEL    |
| Drosophila_mela | LGSAIALVNK  | YCARLPSDTF  | TKLTALWRCT  | RNE-----    | R AGVTLFQYTL   |
| Oryza_sativa_Ja | LNSAVGLIHF  | YCSQLPSDRY  | SILHPEFIMQ  | KYE-----    | KP GGSVEYSCKL  |
| Arabidopsis_tha | LNSAVGLVHF  | YCSQLPGDRY  | AILRPEFSME  | KHE-----    | KP GGHT EYSCRL |
| Neurospora_cras | YMQSLVCLAN  | FTATLPHPPE  | TSLSP EYYIT | TV-----     | --PGGFQCEV     |
| Chaetomium_glob | YKQSLICLAA  | FVASLPHPPE  | VNLTAGYLV L | SV-----     | --PGGYQCEV     |
| Coccidioides_im | YSSSLVVL AH | FANSLQYEKE  | TSTVVSYYHR  | FT-----     | --KNAFVCEV     |
| Aspergillus_nig | YHSATAILAR  | YASSLQYEKE  | FSAQVTYVVL  | PI-----     | --NGAFVCEV     |
| Aspergillus_fum | YHSAIAILAR  | YASSLQYEKE  | TVPQVTYVVT  | IA-----     | --SNAYVCEV     |
| Aspergillus_cla | YHSAIAILAR  | YASSLQYEKE  | TTPQATYVVQ  | SV-----     | --GNTYVCEV     |

|                 |             |            |            |             |            |
|-----------------|-------------|------------|------------|-------------|------------|
| Phaeosphaeria_n | YRSSLSILSH  | FVATYPSPDH | NTMAQPTYVV | NPKISDDPRD  | PQRNGFVCEV |
| Schizosaccharom | GLYAVSLLYN  | FCNTLSRDVY | TRYYPFTTAQ | PCLSG---    | ----WYCFEV |
| Emericella_nidu | AEYAMQHLVH  | FCDTLPRQNY | VEDKPEFSFE | RNDG---G--- | ----LLRAKV |
| Cryphonectria_p | INDAKSHLQH  | FVSTLASRKF | VQTQPDYLI  | KVSQ---GYQP | GDQPLLKATV |
| Neosartorya_fis | ADMAMAHLLH  | FCAVLPPQPY | ADMRPVFSFE | TNED---G--- | ----LLKGTV |
| Candida_albican | EDDEDEIIRI  | ATSYMLGGKG | KKGKKANNNS | TKKPAKTFFM  | PDNVETGFKS |
| Kluyveromyces_l | LEDSDDEVIKY | ATQAMLGKLG | TKKKEPKP-- | -----       | -----KK    |
| Schizosaccharom | SYNNNSSSL   | PVNTLANQAH | SRSKRYLPFI | VD-----     | -----DV    |
| Consistency     | 4447543734  | 6554854544 | 5344433333 | 3210000001  | 1000352357 |

|                 |                                               |            |            |            |            |
|-----------------|-----------------------------------------------|------------|------------|------------|------------|
|                 | .....1260.....1270.....1280.....1290.....1300 |            |            |            |            |
| Homo_sapiens    | YLP--INSPL                                    | RASIV-GPPM | SCVRLAERV- | -----VALIC | CEKLHKIGEL |
| Bos_taurus      | YLP--INSPL                                    | RASIV-GPPM | SCIRLAERV- | -----VALIC | CEKLHKIGEL |
| Mus_musculus    | YLP--INSPL                                    | RASIV-GPPM | DSVRLAERV- | -----VALIC | CEKLHKIGEL |
| Gallus_gallus   | YLP--INSPL                                    | RASIV-GPPM | SCARLAERV- | -----VALIC | CEKLHKIGEL |
| Xenopus_tropica | YLP--INSPL                                    | RAPIV-GPPM | NCGRADRA-  | -----VALIC | CKKLHEIGEL |
| Danio_rerio     | FLP--INSPL                                    | RVPVT-GPVM | NCARLAEKA- | -----VALLC | CEKLHKIGEL |
| Caenorhabditis  | LLP--INSPI                                    | KHAIVLKNPM | PNKKTAQMA- | -----VALEA | CRQLHLEGEL |
| Drosophila_mela | RLP--INSPL                                    | KHDIV-GLPM | PTQTLARRL- | -----AALQA | CVELHRIGEL |
| Oryza_sativa_Ja | QLP--CNAPF                                    | EKLE--GPIC | SSIRLAQQA- | -----VCLAA | CKKLHEMGAF |
| Arabidopsis_tha | QLP--CNAPF                                    | EILE--GPVC | SSMRLAQQA- | -----VCLAA | CKKLHEMGAF |
| Neurospora_cras | VMP--DASPI                                    | KSAV--GKVH | LSKGVAKCA- | -----AAFEL | CLALLKAGHL |
| Chaetomium_glob | TLP--ESSPI                                    | RSAT--GKVY | ASKAVAKCS- | -----AAYEM | CLMLIKGKYL |
| Coccidioides_im | VLP--EKSPI                                    | RGIV--GKPA | SKKLIQKS-  | -----AAFET | CLLLRKHGLL |
| Aspergillus_nig | ILP--EKSPI                                    | RGLT--GSPA | MKKSIAKRS- | -----AAFDT | CLLLRKNKLL |
| Aspergillus_fum | ILP--EKSPI                                    | RGLT--GSPA | MRKAVAKRS- | -----AAFDT | CLLLRKNRLL |
| Aspergillus_cla | ILP--EKSPI                                    | RGLT--GSPA | IRKSIQKS-  | -----AAFDT | CLLLRRHKLL |
| Phaeosphaeria_n | ILP--EHCPI                                    | ISMV--GQVY | SRKTIQKS-  | -----AAFKM | CIELRRKDHL |
| Schizosaccharom | ELP--KACKV                                    | PAAQG--SPA | KSIRKAKQN- | -----AAFIM | CLDLIRMGLI |
| Emericella_nidu | ILPSSVNPKV                                    | RRAEG-KAWW | KTERAAKKE- | -----AAFYA | YKALYEHGLV |
| Cryphonectria_p | LLPVSVQAL                                     | RQVTS-SRTW | VSEKNACMD- | -----AAFQA | YKALYEAGLV |
| Neosartorya_fis | ILPSCVHPKV                                    | RRTEG-RRWW | RTERAAMKE- | -----TAFQA | YKALYEFGLV |
| Candida_albican | AAT--MVRKV                                    | GDNKS-LAER | NKEKTFLDKL | VDSDSDSEVD | KENENVIQEV |
| Kluyveromyces_l | TTA--KAKKS                                    | SDKTF-FMPD | NVKEGFTSA- | -----SSLLN | KYTINEFGEK |
| Schizosaccharom | FED--MESNL                                    | RVPTE-DAKI | KRFKSDYRS- | -----CIYNA | RRNVFSKPTY |
| Consistency     | 4880045667                                    | 6445105443 | 4445585450 | 0000068634 | 6448463647 |

|                 | .....1310.....1320.....1330.....1340.....1350 |                                  |
|-----------------|-----------------------------------------------|----------------------------------|
| Homo_sapiens    | DDHLMFVGKE TVKYEEEL--                         | -----DLHD EEETSVPGRP GSTKRRQCYP  |
| Bos_taurus      | DDHLMFVGKE TVKYEEEL--                         | -----DLHD EEETSVPGRP GSTKRRQCYP  |
| Mus_musculus    | DEHLMFVGKE TVKYEEEL--                         | -----DLHD EEETSVPGRP GSTKRRQCYP  |
| Gallus_gallus   | DDHLMFVGKE TVKYEEEL--                         | -----DLHD EEETSVPGRP GSTKRRQCYP  |
| Xenopus_tropica | DDHLMFVGKE TVKYEEEL--                         | -----DLHD EEETSVPGRP GSTKRRQCYP  |
| Danio_rerio     | DDHLMFVGKE TVKYEEEL--                         | -----DLHD EEETSVPGRP GSTKRRQCSP  |
| Caenorhabditis  | DDNLLPKGRE SIAKLLEH--                         | ----IDEEPD EYAPGIAAKV GSSKRKQLYD |
| Drosophila_mela | DDQLQPIGKE GFRALEPDWE                         | CFELEPEDEQ IVQLSDEPRP GTTKRRQYYY |
| Oryza_sativa_Ja | TDTLLPDRGS GEGEKT---                          | -----EQNDEGEPLP GTARHREFYP       |
| Arabidopsis_tha | TDMLLPDKGS GQDAEKA---                         | -----DQDDEGEPVP GTARHREFYP       |
| Neurospora_cras | DNHLQSVFTK QLPEM-----                         | -----RNARLA VSSKKKTEYA           |
| Chaetomium_glob | DQHLLRPTFTK QLPAM-----                        | -----RNARLA VSSKKKEQYK           |
| Coccidioides_im | DDH FVSTYHK RLPAM-----                        | -----RNARLA ISSKKSNOYD           |
| Aspergillus_nig | DDH FNSIYHR RLPAM-----                        | -----RNAKLA ITSKRTSQYD           |
| Aspergillus_fum | DGY FNSIYHR RLPAM-----                        | -----RNAKLA ITCKRTNAYD           |
| Aspergillus_cla | DDF FKS IYHK RLPAM-----                       | -----RNAKLA ITSKKTNOYD           |
| Phaeosphaeria_n | NEFLLPTISK YLPAM-----                         | -----RNALLA VSEKKKGNYA           |
| Schizosaccharom | DKHLKPLDFR RKIADLE---                         | TLEEDDELKDE GYIETYERYV           |
| Emericella_nidu | NDNLLPLTKS R---EFT---                         | RKDIS--LLP AVQKVSEQYD            |
| Cryphonectria_p | DDHLLPL---                                    | R---DRL---ELELE--VRP GMREVRGLYN  |
| Neosartorya_fis | NDHLLPLTKR P---ELK---                         | SHDLG--AMP SILETSEQYD            |
| Candida_albican | DKSKNQEQND HIITEL---                          | DNTEQSVAGN TKSTTNGTSY            |
| Kluyveromyces_l | IS-----LTP SVSKKA---                          | -----IKPKKEWNML DEIEYDSVEI       |
| Schizosaccharom | MGDKLTKFAK VPHSL---                           | -----TLSTYRRGRL LQQCSPSSVT       |
| Consistency     | 6646464345 4433421000                         | 0000000000 2222533345 4557555373 |

|                 |                                               |            |             |            |            |
|-----------------|-----------------------------------------------|------------|-------------|------------|------------|
|                 | .....1360.....1370.....1380.....1390.....1400 |            |             |            |            |
| Homo_sapiens    | KAIPECLRDS                                    | Y---PRPDQ  | PCYLYVIGMV  | LTTPLPDELN | FRRRKLYPPE |
| Bos_taurus      | KAIPECLRES                                    | Y---PRPGQ  | PCYLYVIGMV  | LTTPLPDELN | FRRRKLYPPE |
| Mus_musculus    | KAIPECLRES                                    | Y---PKPDQ  | PCYLYVIGMV  | LTTPLPDELN | FRRRKLYPPE |
| Gallus_gallus   | KAIPECLRDS                                    | Y---PKPDQ  | PCYLYVIGMV  | LTTPLPDELN | FRRRKLYPPE |
| Xenopus_tropica | KAIPECLRNS                                    | Y---PKPGQ  | PCYLYVIGMV  | LTTPLPDELN | FRRRKLYPPE |
| Danio_rerio     | KAIPECLRGC                                    | Y---PVPEQ  | PCYLYVIGMV  | LTTPLPDELN | FRRRKLYPPE |
| Caenorhabditis  | KKIARALNES                                    | F---VEADK  | ECFIYA FELE | RFREAELTLN | PKRRKFEDPF |
| Drosophila_mela | KRIASEFCDC                                    | R---PVAGA  | PCYLYFIQLT  | LQCPPIPEQN | TRGRKIYPPE |
| Oryza_sativa_Ja | EGVADILRGE                                    | W---ILSGR  | DGYQNSQFIK  | LYMYSVNCVN | V-GTSKDPFV |
| Arabidopsis tha | EGVADV LKGE                                   | WVSSGKEVCE | SSKLFHLYMY  | ---NVRCVD  | F-GSSKDPFL |



|                 |            |            |            |            |            |            |         |     |         |
|-----------------|------------|------------|------------|------------|------------|------------|---------|-----|---------|
| Neurospora_cras | MRLKPELWSV | RG         | ---        | V          | VT         | QLFATAFVL  | ---     | --- | ENPDTLG |
| Chaetomium_glob | MRIKPELWSV | LG         | ---        | E          | PT         | ELFAMALTL  | ---     | --- | ADPTALA |
| Coccidioides_im | MKVKPKLWET | SR         | ---        | GI         | PT         | SLNIVVLGF  | ---     | --- | RPRRLH  |
| Aspergillus_nig | MISKPSLWGR | KQ         | ---        | GM         | PK         | ELHGTFITF  | ---     | --- | LPSMQLS |
| Aspergillus_fum | MLLKPSIWAK | QR         | ---        | TT         | TE         | TFYGIHMSL  | ---     | --- | LPSKPLS |
| Aspergillus_cla | MLLKPSIWRR | HQ         | ---        | GI         | PS         | KLYGTILSL  | ---     | --- | LPSEPLS |
| Phaeosphaeria_n | MVIKPTFWKQ | DR         | ---        | DT         | VE         | SLHLTIIDA  | ---     | --- | DRG--LD |
| Schizosaccharom | PKSWMKVPED | I          | ---        | ---        | T          | RCFVSLLYT  | ---     | --- | DANEGDN |
| Emericella_nidu | PWVDWAHLWS | S          | ---        | ---        | T          | NLYQNRILV  | ---     | --- | RQNEEDT |
| Cryphonectria_p | PWLSIAAACT | Q          | ---        | ---        | G          | DVPLCRRAL  | ---     | --- | KVSDGNN |
| Neosartorya_fis | PWIEWAYSWS | S          | ---        | ---        | P          | DIHQSRIVV  | ---     | --- | RMNEGRG |
| Candida_albican | SEPENNQVN  | Q          | ---        | ES         | TA         | NLDSVARVPE | PEVIENS | --- | ESEEEQI |
| Kluyveromyces_l | SPAKSQVEQP | S          | ---        | Q          | PKP        | TTTQGILTP  | ---     | --- | DETTNHI |
| Schizosaccharom | KYLKYEKFK  | R          | ---        | K          | MKK        | TSNALFQST  | ---     | --- | ---     |
| Consistency     | 4364335334 | 3000022224 | 4454345351 | 1000111011 | 0014433333 |            |         |     |         |

|                 |                                                    |            |             |            |              |  |  |  |  |
|-----------------|----------------------------------------------------|------------|-------------|------------|--------------|--|--|--|--|
|                 | ..... 1410..... 1420..... 1430..... 1440..... 1450 |            |             |            |              |  |  |  |  |
| Homo_sapiens    | DTTRCFGILT                                         | AKPIPQIPH  | --FPVYTRS   | GEVTISIE   | --LKKSGFMLS  |  |  |  |  |
| Bos_taurus      | DTTRCFGILT                                         | AKPIPQIPH  | --FPVYTRS   | GEVTISIE   | --LKKSGFTLS  |  |  |  |  |
| Mus_musculus    | DTTRCFGILT                                         | AKPIPQIPH  | --FPVYTRS   | GEVTISIE   | --LKKSGFTLS  |  |  |  |  |
| Gallus_gallus   | DTTRCFGILT                                         | AKPIPQIPH  | --FPVYTRS   | GEVTISIE   | --LKKSGFTLS  |  |  |  |  |
| Xenopus_tropica | DTTRCFGILT                                         | AKPIPQIPH  | --FPVYTRS   | GEVTISIE   | --LKKSGFTLN  |  |  |  |  |
| Danio_rerio     | DTTRCFGILT                                         | AKPIPRIPH  | --FPVYTRS   | GEVTISIE   | --LQKSGFSLS  |  |  |  |  |
| Caenorhabditis  | NYEYCFGFLS                                         | AKEIPKIPP  | --FPVFLRQ   | GNMKVRLI   | --VAPKKTTVT  |  |  |  |  |
| Drosophila_mela | DAQQGFGLT                                          | TKRIPKLSA  | --FSIFTRS   | GEVKVSL    | --LAKERVILT  |  |  |  |  |
| Oryza_sativa_Ja | TQLSNFAIIF                                         | GNELDAEVLS | TTMDLFVAR   | TMITKASL   | --VFRGRIEIT  |  |  |  |  |
| Arabidopsis_tha | SEVSEFAILF                                         | GNELDAEVLS | MSMDLYVAR   | AMITKASL   | --AFKGSOLDIT |  |  |  |  |
| Neurospora_cras | RSSRPLLLLS                                         | RSALPEVAS  | --FPLFFGTK  | RFSKVRCV   | --PIPGSVQAD  |  |  |  |  |
| Chaetomium_glob | RHSSPLLLLT                                         | RQPIPQIAS  | --FPLYFGKN  | RSSAVHCV   | --PVPGRVELD  |  |  |  |  |
| Coccidioides_im | REYHPLVLLT                                         | REKLPHFPE  | --FPLYLEDD  | IECDVICS   | --SISSGFQVS  |  |  |  |  |
| Aspergillus_nig | HEPAPLLLFT                                         | RERLPHFPE  | --FPIFLDDD  | VETTIITT   | --PLEKQLLLS  |  |  |  |  |
| Aspergillus_fum | RDHRPILLLT                                         | REKLPEFPA  | --FSIYLD    | VETKVL     | --PLKHGLQIS  |  |  |  |  |
| Aspergillus_cla | REHQPIVL                                           | REKLPDFPA  | --FPIYLD    | IETKVVP    | --SLDTGMELS  |  |  |  |  |
| Phaeosphaeria_n | RPHQPLAMLT                                         | RRPFPQLPS  | --FPIYLTDC  | RPSNIVSQ   | --SLHIPISLT  |  |  |  |  |
| Schizosaccharom | HIFHPLVFVQ                                         | AHSFPKIDS  | --FILNSTVG  | PRVKIVLE   | --TIEDSFKID  |  |  |  |  |
| Emericella_nidu | ---SMKFIT                                          | PTATPPIAP  | --MKLCWDSE  | TTYTLEFE   | --AAGA-VSLT  |  |  |  |  |
| Cryphonectria_p | SELCEFEAL                                          | PVALPEMKP  | --MVVWWDHR  | AQLTLRIDSD | AVMADTDVRH   |  |  |  |  |
| Neosartorya_fis | DELC-MRLMG                                         | PTYLPPLSP  | --MTLFWNNS  | TTFTVTFE   | --AAERVPLVP  |  |  |  |  |
| Candida_albican | SKITHNTPAT                                         | SVDLSNG    | --PEETSYSKI | DSVLID     | --LIDDDFTFS  |  |  |  |  |
| Kluyveromyces_l | PSASQGSVQ                                          | TDSHTVQ    | --EP-VLKK   | LKLAHQ     | --IEDPSTSIE  |  |  |  |  |
| Schizosaccharom | -----                                              | -----      | -----       | -----      | -----        |  |  |  |  |
| Consistency     | 3333253565                                         | 4446744430 | 0065654341  | 3445633300 | 0434334465   |  |  |  |  |

|                 |             |            |            |            |            |      |       |      |       |      |
|-----------------|-------------|------------|------------|------------|------------|------|-------|------|-------|------|
|                 | .....       | 1460       | .....      | 1470       | .....      | 1480 | ..... | 1490 | ..... | 1500 |
| Homo_sapiens    | LQMLELITRL  | HQYIFSHILR | LEKPA-LEFK | PTDADSA-YC | VLPLNVV--- |      |       |      |       |      |
| Bos_taurus      | LQMLELITRL  | HQYIFSHILR | LEKPA-LEFK | PTDADSA-YC | VLPLNVV--- |      |       |      |       |      |
| Mus_musculus    | QQMLELITRL  | HQYIFSHILR | LEKPA-LEFK | PTGAESA-YC | VLPLNVV--- |      |       |      |       |      |
| Gallus_gallus   | LQMLELITRL  | HQYIFSHILR | LEKPA-LEFK | PTEADSA-YC | VLPLNIV--- |      |       |      |       |      |
| Xenopus_tropica | LEQLELITRL  | HQYIFSHILR | LEKPA-LEFK | PTVADCA-YC | VLPLNVV--- |      |       |      |       |      |
| Danio_rerio     | AEQLELITRL  | HQYIFSHILR | LEKPA-LEFK | PVEADSA-YC | VLPLNIV--- |      |       |      |       |      |
| Caenorhabditis  | AAQLQEIQLF  | HNYLFTQVLQ | MCKTGNLEFD | GTSNAPLNTL | IVPLNKR--- |      |       |      |       |      |
| Drosophila_mela | SEQIVCINGF  | LNVTFTNVLR | LQKFL-MLFD | PDSTENC-VF | IVPTVKA--- |      |       |      |       |      |
| Oryza_sativa_Ja | ESQLVLLKSF  | HVRLMSIVLD | VDVDP--STT | PWDPAKA-YL | FVPVGAE--- |      |       |      |       |      |
| Arabidopsis_tha | ENQLSSLKKF  | HVRLMSIVLD | VDVEP--STT | PWDPAKA-YL | FVPVTDN--- |      |       |      |       |      |
| Neurospora_cras | DTLVEQLTRF  | TLKAFMDVFS | KE-----YE  | ATAVNLP-YF | LSPMDGGHGF |      |       |      |       |      |
| Chaetomium_glob | DNQIQGLVAV  | TLAIFKDIFS | KE-----YE  | ATAAQLP-YF | LAPTLMQHGS |      |       |      |       |      |
| Coccidioides_im | SHDLEVLTTF  | TLRIFQDIFH | KV-----YD  | RDVGMMT-YW | LAPLNLSCD- |      |       |      |       |      |
| Aspergillus_nig | EKEVDALTVF  | TLRVFRDVFH | KT-----YD  | KEPEKMA-YW | LAPAKVQSSY |      |       |      |       |      |
| Aspergillus_fum | VDKLQSLTVF  | TLRIFRDIFH | KV-----YE  | HEVQKMP-YW | LAPAEADGR  |      |       |      |       |      |
| Aspergillus_cla | AEEELRALTTF | TLRIFRDVFH | KV-----YE  | QSEKLP-YW  | LAPAEPLDAN |      |       |      |       |      |
| Phaeosphaeria_n | PELLEMFTRF  | TLRIFEDIYN | KV-----YD  | YDVSIMS-YW | MLPVIEHRVA |      |       |      |       |      |
| Schizosaccharom | SHLLELLKKS  | TRYLLQFGLS | T-----SL   | EQQIPTP-YW | LAPLNL---- |      |       |      |       |      |
| Emericella_nidu | AENIERMRAA  | TSLYLQATTS | T-----PL   | AGNKDYI-AL | FGP-----   |      |       |      |       |      |
| Cryphonectria_p | ADQTTINQQD  | HTSVLLSLAY | G-----HR   | NMTIRDD-CI | LRLVS----- |      |       |      |       |      |
| Neosartorya_fis | LSSVEDMRAI  | TALYLKATNS | R-----VC   | SSERDFT-AL | FAPDL----- |      |       |      |       |      |
| Candida_albican | SDTEGDKVEV  | IDAVSPEVCK | LPEK--PAT  | PPIRK--SL  | GVRKRV---- |      |       |      |       |      |
| Kluyveromyces_l | LYSG-----   | -----      | -----      | YELVP--QY  | GATDS----- |      |       |      |       |      |
| Schizosaccharom | -----       | -----      | -----      | -----      | -----      |      |       |      |       |      |
| Consistency     | 3446435434  | 4335543643 | 3210000143 | 3333423053 | 5574321000 |      |       |      |       |      |

|               |                                                    |            |            |           |     |  |  |  |  |
|---------------|----------------------------------------------------|------------|------------|-----------|-----|--|--|--|--|
|               | ..... 1510..... 1520..... 1530..... 1540..... 1550 |            |            |           |     |  |  |  |  |
| Homo_sapiens  | ---NDSSTL                                          | DIDFKFMEDI | EKSEARIGIP | STKYTKETP | --- |  |  |  |  |
| Bos_taurus    | ---NDSSTL                                          | DIDFKFMEDI | EKSEARIGIP | STKYSKETP | --- |  |  |  |  |
| Mus_musculus  | ---NDSSTL                                          | DIDFKFMEDI | EKSEARIGIP | STKYSKETP | --- |  |  |  |  |
| Gallus_gallus | ---NDSSTL                                          | DIDFKFMEDI | EKSEARTGIP | STQYTKEMP | --- |  |  |  |  |

..... 1560 ..... 1570 ..... 1580 ..... 1590 ..... 1600

. . . . . 1610 . . . . . 1620 . . . . . 1630 . . . . . 1640 . . . . . 1650

|                 |             |            |             |            |             |
|-----------------|-------------|------------|-------------|------------|-------------|
| Homo_sapiens    | ----        | ---FVFKLED | YQDAVIIP--  | -RYRNFDQPH | RFYVADVYTD  |
| Bos_taurus      | ----        | ---FVFKLED | YQDAVIIP--  | -RYRNFDQPH | RFYVADVYTD  |
| Mus_musculus    | ----        | ---FVFKLED | YQDAVIIP--  | -RYRNFDQPH | RFYVADVYTD  |
| Gallus_gallus   | ----        | ---FIFKLED | YQDAVIIP--  | -RYRNFDQPH | RFYVADVYTD  |
| Xenopus_tropica | ----        | ---FIFKLED | YQDAVIIPRQ  | VIYRNFDQPH | RFYVADVYTD  |
| Danio_rerio     | ----        | ---FIFKLED | YQDAVIIP--  | -RYRNFDQPH | RFYVADVYTD  |
| Caenorhabditis_ | ----        | ---YKFNAED | YKDAIVMP--  | -WYRNLEQPV | FYYVAEILPE  |
| Drosophila_mela | ----        | ---QPFDPQR | FQDAVVMP--  | -WYRNQDQPQ | YFYVAEICPH  |
| Oryza_sativa_Ja | SDYQNQGKLF  | MADSCWNAKD | LAGMVVTA--  | -AHSG---K  | RFYVDCICYN  |
| Arabidopsis_tha | EEDLSK GKLM | MADGCMVAED | LIGKIVTA--  | -AHSG---K  | RFYVDSICYD  |
| Neurospora_cras | ----        | ---L-EPDDF | FQDKFVVD--  | -PYDG---AR | KFFTHHRRHD  |
| Chaetomium_glob | ----        | ---DDEADEF | FKNKYVAD--  | -PYDG---SR | KFFLRGRRHD  |
| Coccidioides_im | ----        | ---S-NSAAF | FANRFVYD--  | -RWDG---RY | RYFTHGIDPS  |
| Aspergillus_nig | ----        | ---N-ADPES | WVDLFVFD--  | -AWDG---RC | RFFTVGVEHS  |
| Aspergillus_fum | ----        | ---N-LNPES | LVNRFIFD--  | -NWDG---RF | RYFTVAVADT  |
| Aspergillus_cla | ----        | ---D-LAPES | LVNRFMFDD-- | -KWDG---RS | RFFTIVKVMEG |
| Phaeosphaeria_n | ----        | ---Q-SRTDD | LIDRYFVD--  | -PMNG---GR | RYYSDRLAPH  |
| Schizosaccharom | ----        | ---F-KL    | PEPVQNVN--  | -----D     | LQSDTVLLVN  |
| Emericella_nidu | ----        | ---A-IQ    | ---VFSSQ--  | -----R     | PLDRMGVVVD  |
| Cryphonectria_p | ----        | ---V-TA    | NGSSYLVR--  | -----D     | ERDQSRHPYY  |
| Neosartorya_fis | ----        | ---M-EV    | YSRGHNPL--  | -----L     | MGVVDRDHSRY |
| Candida_albican | --KKSLGVK   | RPRPVSIIDQ | LKRQKIRS--  | QVIVSRETQS | IIEHESRTQS  |
| Kluyveromyces_l | ----        | ---QEQR    | HFLKKYVP--  | DTVHWSIAPD | LAKSKTRKIR  |
| Schizosaccharom | ----        | ----       | ----        | ----       | ----        |

|                 |                                               |                |                      |              |                    |
|-----------------|-----------------------------------------------|----------------|----------------------|--------------|--------------------|
| Consistency     | 0000000000                                    | 0001122353     | 4344454400           | 0232301123   | 4554335234         |
|                 | .....1660.....1670.....1680.....1690.....1700 |                |                      |              |                    |
| Homo_sapiens    | LTPLSKF---                                    | ---            | ---                  | PSPEYE TF--- | AEYY KTKYNLDLTN    |
| Bos_taurus      | LTPLSKF---                                    | ---            | ---                  | PSPEYE TF--- | AEYY KTKYNLDLTN    |
| Mus_musculus    | LTPLSKF---                                    | ---            | ---                  | PSPEYE TF--- | AEYY KTKYNLDLTN    |
| Gallus_gallus   | LTPLSKF---                                    | ---            | ---                  | PSPEYE TF--- | AEYY KTKYNLDLTN    |
| Xenopus_tropica | LTPLSKF---                                    | ---            | ---                  | PSPEYE TF--- | AEYY KTKYNLDLTN    |
| Danio_rerio     | LTPLSKF---                                    | ---            | ---                  | PSPEYE TF--- | AEYY KTKYNLDLSN    |
| Caenorhabditis  | WRPSSKF---                                    | ---            | ---                  | PDTHFE TF--- | NEYF IKKYKLEIYD    |
| Drosophila_mela | LSP LSCF---                                   | ---            | ---                  | PGDNYR TF--- | KHYY LVKYGLTIQN    |
| Oryza_sativa_Ja | MNAENSF---                                    | ---            | PRK EGYLGPLEYS       | SY---        | ADYY KQKYGVELIY    |
| Arabidopsis_tha | MSAETSF---                                    | ---            | PRK EGYLGPLEYN       | TY---        | ADYY KQKYGVDLNC    |
| Neurospora_cras | MKPTDPVPDG                                    | IVAPNHRWR      | GLGTTHDILN           | YS---        | NSLW SKSRGFMIFQ    |
| Chaetomium_glob | MKPTDMVPEG                                    | IVTPGHRWR      | VSCKTHDILN           | YS---        | LSAW SKSRAFLTPR    |
| Coccidioides_im | LRPSDPPPS-                                    | ---            | SMARR RHMGNIMDYC     | LS---        | LFKN ARKKFLENC     |
| Aspergillus_nig | LTPSSPPPP-                                    | ---            | FVARR RHMNDVMNYC     | LS---        | LSKN SRAKFLSTCH    |
| Aspergillus_fum | LQPSDPPPP-                                    | ---            | SVPRR RYMNNIMNYT     | LS---        | LSKN SRARFLSSCD    |
| Aspergillus_cla | LRAADPPPS-                                    | ---            | SVPRR RHMDNIMSYC     | LS---        | LSKN SRARFLAGCH    |
| Phaeosphaeria_n | LKPQDPVPA-                                    | ---            | NVPRQ NHKFMKNILD     | FS---        | DSKW MKSRDITRWH    |
| Schizosaccharom | PQSIYE---                                     | ---            | ---                  | QYAFEG FV--- | NSEF MIPAKKK---    |
| Emericella_nidu | RSRYGE---                                     | ---            | ---                  | LLIFKR WL--- | NRSG DLEL--E---    |
| Cryphonectria_p | FESVLP---                                     | ---            | ---                  | SKPPAE SI--- | RKVY RGFDEDP---    |
| Neosartorya_fis | GEPFL---                                      | ---            | ---                  | ---          | F--RKWL VSDQNPS--- |
| Candida_albican | SLPSPRNTSD                                    | EISEIDVIID     | LDDDDDDDDNK          | VNGHDKSQTT   | ISKVQPIYEF         |
| Kluyveromyces_l | HVP---                                        | ---            | ---                  | KIEE I---    | LNTC QDMHTNTREK    |
| Schizosaccharom | ---                                           | ---            | ---                  | ---          | ---                |
| Consistency     | 4463432000                                    | 0000000001     | 0000223343           | 3400004433   | 4454344222         |
|                 | .....1710.....1720.....1730.....1740.....1750 |                |                      |              |                    |
| Homo_sapiens    | LNQPLLDVDH                                    | TSSRLNLLTP     | RHLNQKGKAL           | PLSS         | -----AEKRKA        |
| Bos_taurus      | LNQPLLDVDH                                    | TSSRLNLLTP     | RHLNQKGKAL           | PLSS         | -----AEKRKA        |
| Mus_musculus    | LNQPLLDVDH                                    | TSSRLNLLTP     | RHLNQKGKAL           | PLSS         | -----AEKRKA        |
| Gallus_gallus   | LNQPLLDVDH                                    | TSSRLNLLTP     | RHLNQKGKAL           | PLSS         | -----AEKRKA        |
| Xenopus_tropica | LNQPLLDVDH                                    | TSSRLNLLTP     | RHLNQKGKAL           | PLSS         | -----AEKRKA        |
| Danio_rerio     | VNQPLLDVDH                                    | TSSRLNLLTP     | RHLNQKGKAL           | PLSS         | -----AEKRKA        |
| Caenorhabditis  | QNQSLLDVDF                                    | TSTRNLNLQP     | RIQNQPRRSR           | TVSNSSTSN    | PQASASDSKE         |
| Drosophila_mela | TSQPLLDVDH                                    | TSARLNFLTP     | RYVNRKGVAL           | PTSS         | -----EETKRA        |
| Oryza_sativa_Ja | ARKQPLIRARG                                   | VSCKNLLSP      | RFEHSDA---           | ---          | -----REGDFS        |
| Arabidopsis_tha | KQQPLIKGRG                                    | VSCKNLLSP      | RF-----E---          | ---          | -----QSGESE        |
| Neurospora_cras | ADQPVVEAAL                                    | ISTRDFLD       | ---                  | ---          | -----D--TLR        |
| Chaetomium_glob | EDQPVVEAEV                                    | LPIRRNLID      | ---                  | ---          | -----D--HIG        |
| Coccidioides_im | WTQPVIKAEI                                    | IQLRRNLID      | ---                  | ---          | -----K--RTN        |
| Aspergillus_nig | WDQPVLRAEL                                    | VRLRRNLID      | ---                  | ---          | -----K--MTD        |
| Aspergillus_fum | WNQPVLQAEI                                    | VRLRRNLID      | ---                  | ---          | -----K--MTT        |
| Aspergillus_cla | WDQPVLQAEI                                    | VRLRRNLID      | ---                  | ---          | -----K--LTT        |
| Phaeosphaeria_n | QDQPVQLQVEK                                   | IPFRRNHILA     | ---                  | ---          | -----NVEDKE        |
| Schizosaccharom | DKAPSALCKK                                    | LPLRLNYSIW     | GNRA                 | ---          | -----KSIPKS        |
| Emericella_nidu | CDPYPSKRRN                                    | LLQRQTLAKK     | RPAE                 | ---          | -----DEILGS        |
| Cryphonectria_p | TEATYLSVRK                                    | WPKKTGFFHR     | PCSP                 | ---          | -----QHSPST        |
| Neosartorya_fis | CSVVELECAP                                    | FPHRRNLHR      | QRLA                 | ---          | -----NSQVDV        |
| Candida_albican | SNKEDEGFLS                                    | SSQTRELYKN     | YYIA                 | ---          | -----IDSSDD        |
| Kluyveromyces_l | -----IIG                                      | MNRTNALARS     | IGYN                 | ---          | -----RSVGME        |
| Schizosaccharom | ---                                           | ---            | ---                  | ---          | ---                |
| Consistency     | 2465454542                                    | 4436466642     | 2112101000           | 0010000000   | 0000432344         |
|                 | .....1760.....1770.....1780.....1790.....1800 |                |                      |              |                    |
| Homo_sapiens    | KWESL---                                      | QN KQILVPELCA  | IHPPIP--ASL          | WRKAVCLPSI   | LYRLFCLLTA         |
| Bos_taurus      | KWESL---                                      | QN KQILVPELCA  | IHPPIP--ASL          | WRKAVCLPSI   | LYRLFCLLTA         |
| Mus_musculus    | KWESL---                                      | QN KQILVPELCA  | IHPPIP--ASL          | WRKAVCLPSI   | LYRLFCLLTA         |
| Gallus_gallus   | KWESL---                                      | QN KQILVPELCA  | IHPPIP--ASL          | WRKAVCLPSI   | LYRLFCLLTA         |
| Xenopus_tropica | KWESL---                                      | QN KQILVPELCA  | IHPVP--ASL           | WRKAVCLPSI   | LYRLFCLLTA         |
| Danio_rerio     | KWESL---                                      | QN KQILVPELCA  | IHPPIP--ASL          | WRKAVCLPSI   | LYRLFCLLTA         |
| Caenorhabditis  | SNTSVPHSSQ                                    | RQILVPELMD     | IHPIS--ATL           | WNVIAALPSI   | FYRVNQLLLT         |
| Drosophila_mela | KREN---                                       | EQ KQILVPELCT  | VHPFP--ASL           | WRTAVCLPCI   | LYRTNGLLLA         |
| Oryza_sativa_Ja | ENLDK---                                      | TY YVYLPPELCL  | VHPLP--GSL           | VRGAQRLPSI   | MRRVFSMLLA         |
| Arabidopsis_tha | TVLDK---                                      | TY YVFLPPELCV  | VHPLS--GSL           | IRGAQRLPSI   | MRRVFSMLLA         |
| Neurospora_cras | DEDVE---                                      | PQ QCFILILEPMR | ISPIP--ADV           | VAMLLCFPSI   | IHRVESNLVA         |
| Chaetomium_glob | DDDL---                                       | PK PCFIVLEPLR  | ISPLP--VDL           | VAMAYNFPAI   | MHRTISNLVA         |
| Coccidioides_im | KEKIK---                                      | EG DYYICLEPLT  | ISAIP--ASV           | AAFAFAFPFI   | ISRTFSYLLA         |
| Aspergillus_nig | TERDV---                                      | ET RCFICIEPLK  | VSAIP--AST           | AFSCLAFPFI   | ISRTIAYLLS         |
| Aspergillus_fum | QEKEM---                                      | QT ECFICAEPLR  | ISALP--PSI           | VSTCLAFPFI   | ISRLISYLLA         |
| Aspergillus_cla | EEKKI---                                      | QT ECFICAEPLK  | ISAIP--PSI           | ASTCLAFPFI   | ITRLDSYLLS         |
| Phaeosphaeria_n | KKELA---                                      | NL ETYICPEPLH  | ISNLA--TPF           | VVMCYVLPFI   | IHRFESYLLA         |
| Schizosaccharom | QQVR---                                       | ---            | SFYINDLY--ILPVS--RHL | KNSALLIPSI   | LYHTFNLLVA         |
|                 |                                               |                | ASE                  | TVFGRFIPVI   | LDRLEAALVA         |



|                 | .....  | 1910. | .....   | 1920. | .....   | 1930. | .....      | 1940.  | ..... | 1950. |
|-----------------|--------|-------|---------|-------|---------|-------|------------|--------|-------|-------|
| Homo_sapiens    | -----  | SVN   | CRTLLES | ESPG  | KLHVEV  | SA--  | -----      | -----  | ----- | DL    |
| Bos_taurus      | -----  | SVN   | CRTLFS  | ESPG  | KLQIEV  | ST--  | -----      | -----  | ----- | DL    |
| Mus_musculus    | -----  | SVN   | CKRLPA  | ESPA  | KLQSEV  | ST--  | -----      | -----  | ----- | DL    |
| Gallus_gallus   | -----  | SVS   | YRTLLE  | DESPS | KLQIDV  | SA--  | -----      | -----  | ----- | EL    |
| Xenopus_tropica | -----  | MQI   | NDQMSV  | ----  | NCTPPC  | Q--   | -----      | -----  | ----- | KS    |
| Danio_rerio     | -----  | NTP   | DEKLET  | ----  | LTLPVT  | D--   | -----      | -----  | ----- | LN    |
| Caenorhabditis  | -----  | LFN   | IGVWD   | PEEAV | RIGVEI  | SSR-  | -----      | -----  | ----- | DD    |
| Drosophila_mela | KLOEAD | DFIE  | IGTWSN  | DMAD  | DIASFNO | EDD   | DEDDAFHLPV | LPANVK | FCDO  |       |

|                 | 1960       |            | 1970       |            | 1980       |       | 1990 |  | 2000 |  |
|-----------------|------------|------------|------------|------------|------------|-------|------|--|------|--|
| Homo_sapiens    | TAINGLSYNQ | NLANGSYDLA | NRDFCQGNQL | NYYKQEIPVQ | PTTS       | ----- |      |  |      |  |
| Bos_taurus      | TAINGLSYNK | SLANGSYDLA | NRDFCQGNHL | NYYKQEIPVQ | PTTS       | ----- |      |  |      |  |
| Mus_musculus    | TAINGLSYNK | NLANGSYDLV | NRDFCQGNQL | NYFKQEIPVQ | PTTS       | ----- |      |  |      |  |
| Gallus_gallus   | AAINGVSYNK | NLANGNCDLV | NRDFCQGNQL | NYCRQEIPVQ | PTTS       | ----- |      |  |      |  |
| Xenopus_tropica | LSHLQTVCFs | ---DDYKAIN | GISCNGLTNG | DWEAESAACF | QKDE       | ----- |      |  |      |  |
| Danio_rerio     | KDCFPNLPNG | TQADSDDLPH | RSDVCQCSQL | GPLERDLSTQ | TTTS       | ----- |      |  |      |  |
| Caenorhabditis  | RMDGEDQD-- | TVGLTQGLHD | GNISDEDDEL | PVMHDYTAR  | LTSNRNGIGA |       |      |  |      |  |
| Drosophila_mela | QTRYGSPTFW | DVSNGESGFK | GPKSSQNKQG | GKGKAKGPAK | PTFN       | ----- |      |  |      |  |

|                 |                     |                     |                     |                     |                     |
|-----------------|---------------------|---------------------|---------------------|---------------------|---------------------|
| Oryza_sativa_Ja | -                   | -                   | -                   | -                   | -                   |
| Arabidopsis_tha | -                   | -                   | -                   | -                   | -                   |
| Neurospora_cras | -                   | -                   | -                   | -                   | -                   |
| Chaetomium_glob | -                   | -                   | -                   | -                   | -                   |
| Coccidioides_im | -                   | -                   | -                   | -                   | -                   |
| Aspergillus_nig | -                   | -                   | -                   | -                   | -                   |
| Aspergillus_fum | -                   | -                   | -                   | -                   | -                   |
| Aspergillus_cla | -                   | -                   | -                   | -                   | -                   |
| Phaeosphaeria_n | -                   | -                   | -                   | -                   | -                   |
| Schizosaccharom | -                   | -                   | -                   | -                   | -                   |
| Emericella_nidu | -                   | -                   | -                   | -                   | -                   |
| Cryphonectria_p | -                   | -                   | -                   | -                   | -                   |
| Neosartorya_fis | -                   | -                   | -                   | -                   | -                   |
| Candida_albican | -                   | -                   | -                   | -                   | -                   |
| Kluyveromyces_l | -                   | -                   | -                   | -                   | -                   |
| Schizosaccharom | -                   | -                   | -                   | -                   | -                   |
| Consistency     | 0 0 0 0 0 0 0 0 0 0 | 0 0 0 0 0 0 0 0 0 0 | 0 0 0 0 0 0 0 0 0 0 | 0 0 0 0 0 0 0 0 0 0 | 0 0 0 0 0 0 0 0 0 0 |

|                 | 2010                |         |            | 2020   |            |            | 2030                |                 |            | 2040 |            |  | 2050       |  |  |
|-----------------|---------------------|---------|------------|--------|------------|------------|---------------------|-----------------|------------|------|------------|--|------------|--|--|
| Homo_sapiens    | ----                | YSIQN   | LYSYENQPP  | SD     | ----       | ECT        | L L S N K Y L D G N | ANKSTSDG        | ----       |      |            |  |            |  |  |
| Bos_taurus      | ----                | YPIQN   | LYNYENQPKP | SD     | ----       | ECT        | L L S N K Y L D G N | ANTSTSDG        | ----       |      |            |  |            |  |  |
| Mus_musculus    | ----                | YPIQN   | LYNYENQPKP | SN     | ----       | ECP        | L L S N T Y L D G N | ANTSTSDG        | ----       |      |            |  |            |  |  |
| Gallus_gallus   | ----                | YPIQN   | LYSSENQPKP | SN     | ----       | ECT        | L L S N K Y L D G N | ANRSTSDG        | ----       |      |            |  |            |  |  |
| Xenopus_tropica | ----                | RITCK   | QEIKEKSTSF | HV     | ----       | QNL        | P K E N Q P I L K E | CTLSNSDG        | ----       |      |            |  |            |  |  |
| Danio_rerio     | ----                | VSVRP   | SPAGEPQPWP | SD     | ----       | ECT        | G R S S D L C D P H | V K K P T S K H | ----       |      |            |  |            |  |  |
| Caenorhabditis  | WSGSES              | I V P S | GWGDWDGPEP | DNSPMP | FQIL       | GGPGGLNVQA | LMADVGRVFD          |                 |            |      |            |  |            |  |  |
| Drosophila_mela | Y Y D S D N S L G S |         | SYDDDDNAGP | LN     | ----       | Y M H H    | NYSSDDDDVA          | DDIDAGRI        | ----       |      |            |  |            |  |  |
| Oryza_sativa_Ja | -----               |         |            |        | -----      |            |                     |                 | -----      |      |            |  |            |  |  |
| Arabidopsis_tha | -----               |         |            |        | -----      |            |                     |                 | -----      |      |            |  |            |  |  |
| Neurospora_cras | -----               |         |            |        | -----      |            |                     |                 | -----      |      |            |  |            |  |  |
| Chaetomium_glob | -----               |         |            |        | -----      |            |                     |                 | -----      |      |            |  |            |  |  |
| Coccidioides_im | -----               |         |            |        | -----      |            |                     |                 | -----      |      |            |  |            |  |  |
| Aspergillus_nig | -----               |         |            |        | -----      |            |                     |                 | -----      |      |            |  |            |  |  |
| Aspergillus_fum | -----               |         |            |        | -----      |            |                     |                 | -----      |      |            |  |            |  |  |
| Aspergillus_cla | -----               |         |            |        | -----      |            |                     |                 | -----      |      |            |  |            |  |  |
| Phaeosphaeria_n | -----               |         |            |        | -----      |            |                     |                 | -----      |      |            |  |            |  |  |
| Schizosaccharom | -----               |         |            |        | -----      |            |                     |                 | -----      |      |            |  |            |  |  |
| Emericella_nidu | -----               |         |            |        | -----      |            |                     |                 | -----      |      |            |  |            |  |  |
| Cryphonectria_p | -----               |         |            |        | -----      |            |                     |                 | -----      |      |            |  |            |  |  |
| Neosartorya_fis | -----               |         |            |        | -----      |            |                     |                 | -----      |      |            |  |            |  |  |
| Candida_albican | -----               |         |            |        | -----      |            |                     |                 | -----      |      |            |  |            |  |  |
| Kluyveromyces_l | -----               |         |            |        | -----      |            |                     |                 | -----      |      |            |  |            |  |  |
| Schizosaccharom | -----               |         |            |        | -----      |            |                     |                 | -----      |      |            |  |            |  |  |
| Consistency     | 0000000000          |         | 0000000000 |        | 0000000000 |            | 0000000000          |                 | 0000000000 |      | 0000000000 |  | 0000000000 |  |  |

|                 | .....      | 2060.....  | 2070.....  | 2080.....  | 2090.....  | 2100       |
|-----------------|------------|------------|------------|------------|------------|------------|
| Homo_sapiens    | -----      | SPVM       | AVMPGTTDTI | QVLKGRMDSE | QSPSIGYSSR | TLGPNPGLIL |
| Bos_taurus      | -----      | SPVT       | AAVPGTTETG | EAPPDRTASE | QSPSPGYSSR | TLGPNPGLIL |
| Mus_musculus    | -----      | SPAV       | STMPAMMNAV | KALKDRMDSE | QSPSVGYSSR | TLGPNPGLIL |
| Gallus_gallus   | -----      | CPKM       | TVTTSTSTAL | NLSKDKVDSE | KNTSSGYSSK | TLGPNPGLIL |
| Xenopus_tropica | -----      | NVSK       | PTSDECPSTC | TSDMHYDSGL | SNRHSSKTLG | ---PNPGLIL |
| Danio_rerio     | -----      | CPKS       | ETATSTPAPS | ETSSEDCRSA | CAGPAWDSPK | TLGPNPGLIL |
| Caenorhabditis  | PSTASSLSQ  | TVQESTVSP  | KQLTKEEEQF | KKLQ       | -----N     | DLLKQAKERL |
| Drosophila_mela | -----AFTS  | KNEAETIETA | QEVEKRQKQL | SIIQATNANE | RQYQQTKNLL |            |
| Oryza_sativa_Ja | -----      |            | -PATKILEAL | TAASCQ     | ----       | E-----     |
| Arabidopsis_tha | -----      |            | -PTSKILEAL | TAASCQ     | ----       | E-----     |
| Neurospora_cras | -----      |            | -RPDLALEAF | TKDSDN     | ----       | ----SDEHDA |
| Chaetomium_glob | -----      |            | -RPDLALEAF | TKDSDN     | ----       | ----SGEHDA |
| Coccidioides_im | -----      |            | -SPELALEAL | TKDSDN     | ----       | ----TDEHRA |
| Aspergillus_nig | -----      |            | -KLDLALEAF | TKDSDN     | ----       | ----TDEHRA |
| Aspergillus_fum | -----      |            | -RPDFALEAF | TKDSDN     | ----       | ----TEEHRG |
| Aspergillus_cla | -----      |            | -RSDYALEAV | TKDSDN     | ----       | ----TEEHRG |
| Phaeosphaeria_n | -----      |            | -SPALALEAL | TKDSDN     | ----       | ----SEEHGE |
| Schizosaccharom | -----      |            | -KIDTACQAL | TSAESQL    | ----       | -----      |
| Emericella_nidu | -----      |            | -----QF    | QDLRHVITAI | TMPLAQA    | ----       |
| Cryphonectria_p | -----      |            | -----RI    | SNVSMLVEAI | CAKSART    | ----       |
| Neosartorya_fis | -----      |            | -----GF    | KSTDHIITAI | STPFAHA    | ----       |
| Candida_albican | -----      |            | -----      | -----      | -----      | -----      |
| Kluyveromyces_l | -----      |            | -----      | -----      | -----      | -----      |
| Schizosaccharom | -----      |            | -----      | -----      | -----      | -----      |
| Consistency     | 0000000000 | 0000000000 | 1333233453 | 4324330000 | 0000212111 |            |



|                 | ..... 2110 .....    | 2120 .....          | 2130 .....          | 2140 .....          | 2150 .....          |
|-----------------|---------------------|---------------------|---------------------|---------------------|---------------------|
| Homo_sapiens    | QALTLSN---          | -ASDGFNLER          | LEMLGDSFLK          | HA-----             | -----               |
| Bos_taurus      | QALTLSN---          | -ASDGFNLER          | LEMLGDSFLK          | HA-----             | -----               |
| Mus_musculus    | QALTLSN---          | -ASDGFNLER          | LEMLGDSFLK          | HA-----             | -----               |
| Gallus_gallus   | QALTLSN---          | -ASDGFNLER          | LEMLGDSFLK          | HA-----             | -----               |
| Xenopus_tropica | QALTLSN---          | -ASDGFNLER          | LEMLGDSFLK          | HA-----             | -----               |
| Danio_rerio     | QALTLSN---          | -ASDGFNLER          | LEMLGDSFLK          | HA-----             | -----               |
| Caenorhabditis  | EALEMS---           | DMEKPRRLED          | TVNLEDYGD           | Q-----              | -----               |
| Drosophila_mela | IGFNFKHEDQ          | KEPATIRYEE          | SIAKLKTEIE          | SGGMLVPHDQ          | QLVLKRSDAA          |
| Oryza_sativa_Ja | -----               | ---TLCYER           | AELLGDAYLK          | W-----              | -----               |
| Arabidopsis_tha | -----               | ---TFCYER           | AELLGDAYLK          | W-----              | -----               |
| Neurospora_cras | EKENFQT---          | --GMGDNYER          | LEFLGDSFLK          | M-----              | -----               |
| Chaetomium_glob | EQISFQS---          | --GMGNMYER          | LEFLGDCFLK          | M-----              | -----               |
| Coccidioides_im | QQIHFQR---          | --GMGKNYER          | LEFLGDCFLK          | M-----              | -----               |
| Aspergillus_nig | QQIHFQR---          | --GMGRNYER          | LEFLGDCFLK          | M-----              | -----               |
| Aspergillus_fum | QQIHFQR---          | --GMGKNYER          | LEFLGDCFLK          | M-----              | -----               |
| Aspergillus_cla | QQIHFQR---          | --GMGKNYER          | LEFLGDCFLK          | M-----              | -----               |
| Phaeosphaeria_n | EKINFKS---          | --GMGPNYER          | LEFLGDCFLK          | V-----              | -----               |
| Schizosaccharom | -----               | ---NFDYDR           | LEFYGDCFLK          | L-----              | -----               |
| Emericella_nidu | -----               | ---PTDYQR           | YEFFGDSVLK          | F-----              | -----               |
| Cryphonectria_p | -----               | ---PENYER           | IEFLGDSILK          | T-----              | -----               |
| Neosartorya_fis | -----               | ---LTNYQR           | YEFLLGDSILK         | F-----              | -----               |
| Candida_albican | -----               | -----               | -----               | -----               | -----               |
| Kluyveromyces_l | -----               | -----               | -----               | -----               | -----               |
| Schizosaccharom | -----               | -----               | -----               | -----               | -----               |
| Consistency     | 2 2 2 1 2 2 1 0 0 0 | 0 0 2 1 4 2 5 5 6 6 | 4 6 4 6 6 7 4 4 6 6 | 2 0 0 0 0 0 0 0 0 0 | 0 0 0 0 0 0 0 0 0 0 |

|                 | ..... 2160 .....    | 2170 .....          | 2180 .....          | 2190 .....        | 2200 .....        |
|-----------------|---------------------|---------------------|---------------------|-------------------|-------------------|
| Homo_sapiens    | ---ITT-YLF          | CTYPDAHEGR          | LSYMRSKKVS          | NC-----NL         | YRLG---KK         |
| Bos_taurus      | ---ITT-VSL          | ALILDAHEGR          | LSYMRSKKVS          | NC-----NL         | YRLG---KK         |
| Mus_musculus    | ---ITT-YLF          | CTYPDAHEGR          | LSYMRSKKVS          | NC-----NL         | YRLG---KK         |
| Gallus_gallus   | ---ITT-YLF          | CTYPDAHEGR          | LSYMRSKKVS          | NC-----NL         | YRLG---KK         |
| Xenopus_tropica | ---ITT-YLF          | CTYPDAHEGR          | LSYMRSKKVS          | NC-----NL         | YRLG---KK         |
| Danio_rerio     | ---ITT-YLF          | CTYPDAHEGR          | LSYMRSKKVS          | NC-----NL         | YRLG---KK         |
| Caenorhabditis  | ---ENQEDEN          | TPTNF--PKT          | IDEEIEELSI          | GAR-----KK        | QEIDDNAAKT        |
| Drosophila_mela | EAQVAKVSMM          | ELLKQLLPYV          | NEDVLAKKLG          | DRRELLLSDL        | VELNADWVAR        |
| Oryza_sativa_Ja | ---VVSRLF           | LKYPQKHEGQ          | LTRMRQQMVS          | NM-----VL         | YQYA---LN         |
| Arabidopsis_tha | ---VVSRLF           | LKYPQKHEGQ          | LTRMRQQMVS          | NM-----VL         | YQFA---LV         |
| Neurospora_cras | ---ATTIAIY          | TLIPDKGEFE          | YHVERMLLIC          | NK-----NL         | FNNA---LE         |
| Chaetomium_glob | ---ATTISIF          | TLIPDKAEFE          | YHVERMLLIC          | NR-----NL         | FNNA---LE         |
| Coccidioides_im | ---ATSISLF          | AMNPDNDERG          | WYPGGLTLLQ          | GK-----GQ         | SKGA---TE         |
| Aspergillus_nig | ---ATSIALF          | TQNPDDDEFD          | YHVNRMLLIC          | NK-----NL         | FNAA---VD         |
| Aspergillus_fum | ---ATSIALF          | SQNPNDDEFD          | YHVNRMLLIC          | NK-----NL         | FNTA---IK         |
| Aspergillus_cla | ---ATSIALF          | TQNPDDDEFD          | YHVNRMLLIC          | NK-----NL         | FNTA---KK         |
| Phaeosphaeria_n | ---ATSLSVF          | VQQPEENEFE          | FHVRRMLMLC          | NQ-----NL         | META---VG         |
| Schizosaccharom | ---GASITVF          | LKFPDTQEYQ          | LHFNRKKIIS          | NC-----NL         | YKVA---ID         |
| Emericella_nidu | ---TVAASLF          | YNNPNWHEGY          | LTETLHALVQ          | NA-----RL         | TRAA---LD         |
| Cryphonectria_p | ---CITVNLA          | ATKLHLPEGI          | LSLMKDRLVS          | NA-----RL         | CRAA---CD         |
| Neosartorya_fis | ---SVSCQLF          | FQHPNWHEGY          | LSEGRAMIVQ          | NP-----RL         | AKAA---LD         |
| Candida_albican | -----               | -----               | -----               | -----             | -----             |
| Kluyveromyces_l | -----               | -----               | -----               | -----             | -----             |
| Schizosaccharom | -----               | -----               | -----               | -----             | -----             |
| Consistency     | 0 0 0 3 5 5 2 3 6 5 | 3 3 3 5 4 2 3 6 3 3 | 4 3 2 3 5 3 3 4 6 3 | 6 3 0 0 0 0 0 4 6 | 3 4 3 5 0 0 0 3 3 |

|                 | 2210       | 2220                | 2230       | 2240       | 2250       |
|-----------------|------------|---------------------|------------|------------|------------|
| Homo_sapiens    | KG-LPSR--- | MVVSIMVVSIFDPPVNWLP | GYVVNQDKSN | TDK        |            |
| Bos_taurus      | KG-LPSR--- | MVVSIMVVSIFDPPVNWLP | GYVVNQDKSN | TEK        |            |
| Mus_musculus    | KG-LPSR--- | MVVSIMVVSIFDPPVNWLP | GYVVNQDKSN | SEK        |            |
| Gallus_gallus   | KG-LPSR--- | MVVSIMVVSIFDPPVNWLP | GYIVNQDKSN | TDK        |            |
| Xenopus_tropica | KG-SPSR--- | MVVSIMVVSIFDPPVNWLP | GYIVNQDKN- | SDK        |            |
| Danio_rerio     | KG-LPSR--- | MVVSIMVVSIFDPPVNWLP | GYVVNQDKSS | TDK        |            |
| Caenorhabditis  | DV-LERE--- | NCEVLPVAINEKSR      | SFSFEKESKA | ING        |            |
| Drosophila_mela | HE-QETYNVM | GCGDSFDNYN          | DHHRLNLDEK | QLKLQYERIE | IEPPTSTKAI |
| Oryza_sativa_Ja | KT-LQSY--- | IQADR               | FAPSR-WAAP | GVLPVFDEES | REY        |
| Arabidopsis_tha | KG-LQSY--- | IQADR               | FAPSR-WSAP | GVPPVFDDET | KDG        |
| Neurospora_cras | IG-LEEY--- | IRSMS               | FNRRQ-WYPE | GLILKKGKSK | DAR        |
| Chaetomium_glob | VK-LEEH--- | IRSMA               | FDRRS-WYPE | GLTLKKGKRK | DLT        |
| Coccidioides_im | N--KHA---  | LAD                 |            |            |            |
| Aspergillus_nig | KE-IYKY--- | IRSRG               | FSRHT-WYPE | GLKLLQGKDH | SRK        |
| Aspergillus_fum | KQ-IYRY--- | IRSRG               | FSRHI-WYPD | GLTLLHGKDH | STK        |
| Aspergillus_cla | RQ-IYRY--- | IRSRS               | FSRHV-WYPD | GLTLLQGKDH | SKK        |
| Phaeosphaeria_n | KKKLYKY--- | VRTDA               | FSRRN-WYPE | GLKLLRGKGL | KKT        |
| Schizosaccharom | CE-LPKY--- | ALSTP               | LEIRH-WCPY | GFQKSTSDKC | RYA        |
| Emericella_nidu | QG-LDAY--- | IISNR               | FTPRK-WSAP | LI--SEKLY  | ASA        |
| Cryphonectria_p | AE-LDQF--- | LVTQQ               | LVTKG-WQPP | YMSDLAKQDQ | EPE        |
| Neosartorya_fis | TG-LDAY--- | IVTKR               | IASRK-WSAP | LISEKLER-- | -VP        |
| Candida_albican |            |                     |            |            |            |
| Kluyveromyces_l |            |                     |            |            |            |
| Schizosaccharom |            |                     |            |            |            |
| Consistency     | 3305343000 | 0000043332          | 5333215243 | 4322233522 | 2230000000 |

|                 | 2260       | 2270        | 2280        | 2290       | 2300       |
|-----------------|------------|-------------|-------------|------------|------------|
| Homo_sapiens    | WEKD       | EMTKDCMLAN  | GKLDEDEYEEE | DEEEESLMWR | APKEEAD-YE |
| Bos_taurus      | WEKD       | EMTKDCMLAN  | GKLDDDFEEE  | EEEEEDLMWR | AHKEDAD-DE |
| Mus_musculus    | WEKD       | EMTKDCMLAN  | GKL--G--EA  | CEEEEDLTWR | APKEEAE-DE |
| Gallus_gallus   | WEKE       | ETTKENLLAN  | GKLDYD--DD  | DEEDEDLMWR | LPKEETD-FE |
| Xenopus_tropica | WESN       | ETSGEDVMVN  | GKIDED--FD  | DEEDEDLMWR | NPKEETD-FD |
| Danio_rerio     | WDSD       | ENKDLANGKA  | SDDDEDE--DD | DDEPEEAEVE | PSKEDVN-V- |
| Caenorhabditis  | RLIRQRSEE  | YVSHIDSDIG  | LGVSPCLLLT  | ALTTSNAADG | MSLERFETIG |
| Drosophila_mela | TSAILPAGFS | FDRQPDVLVGH | PGPSPSIILQ  | ALTMSNANDG | INLERLETIG |
| Oryza_sativa_Ja |            |             |             |            |            |
| Arabidopsis_tha |            |             |             |            |            |
| Neurospora_cras |            |             |             |            |            |
| Chaetomium_glob |            |             |             |            |            |
| Coccidioides_im |            |             |             |            |            |
| Aspergillus_nig |            |             |             |            |            |
| Aspergillus_fum |            |             |             |            |            |
| Aspergillus_cla |            |             |             |            |            |
| Phaeosphaeria_n |            |             |             |            |            |
| Schizosaccharom |            |             |             |            |            |
| Emericella_nidu |            |             |             |            |            |
| Cryphonectria_p |            |             |             |            |            |
| Neosartorya_fis |            |             |             |            |            |
| Candida_albican |            |             |             |            |            |
| Kluyveromyces_l |            |             |             |            |            |
| Schizosaccharom |            |             |             |            |            |
| Consistency     | 0000000000 | 0000000000  | 0000000000  | 0000000000 | 0001000000 |

|                 | 2310       | 2320       | 2330       | 2340       | 2350       |
|-----------------|------------|------------|------------|------------|------------|
| Homo_sapiens    | DDFLEYDQEH | IRFIDNMLMG | SGAFVKKISL | SPFSTTDSAY | EWKMPKKSSL |
| Bos_taurus      | DDFLEYDQEH | IKFIDNMLMG | SGAFVKKISL | SPFSATDSAY | EWKMPKKSSL |
| Mus_musculus    | DDFLEYDQEH | IQFIDSMLMG | SGAFVRKISL | SPFSASDSAY | EWKMPKKASL |
| Gallus_gallus   | DDFLEYDQEH | IKFIDSMLMG | SGAFVKKISL | SHFSTTDSNY | EWKAPKKSSL |
| Xenopus_tropica | DDFLEYDQEH | IKFIDSMLMG | SGAFVKKIPL | SSFAPPDQNY | EWKAPKKPPL |
| Danio_rerio     | EDDLEYYYEH | IRFIDSMLIG | SGAFGKKISL | QPTDPG--Y  | EWKAPKKAHN |
| Caenorhabditis  | DSFLKFATTD | YLYHTLLDQH | EGKLSFARSK | EV---SNCN  | LYRLGKKLGI |
| Drosophila_mela | DSFLKYAITT | YLYITYENVH | EGKLSHLRSK | QV---ANLN  | LYRLGRRKRL |
| Oryza_sativa_Ja | EPSIFDEES  | TGCELQKESY | DDYADNMQED |            |            |
| Arabidopsis_tha | GSSFFDEEQ  | KPVSEENS-- | DVFEDGEMED |            |            |
| Neurospora_cras | QR         |            |            |            |            |
| Chaetomium_glob | RQ         |            |            |            |            |
| Coccidioides_im |            |            |            |            |            |
| Aspergillus_nig | ATT--ESK   |            |            |            |            |
| Aspergillus_fum | LLS--EGK   |            |            |            |            |
| Aspergillus_cla | MLS--QAK   |            |            |            |            |
| Phaeosphaeria_n | EEDWLNVT   |            |            |            |            |





|                 | ..... 2460 ..... | 2470 .....  | 2480 ..... | 2490 ..... | 2500        |
|-----------------|------------------|-------------|------------|------------|-------------|
| Homo_sapiens    | DLHTEQCIAD       | KSIADCVEAL  | LGCYLTSCGE | RAAQ-----  | LFLCSLGLKV  |
| Bos_taurus      | DLHTEQCIAD       | KSIADCVEAL  | LGCYLTSCGE | RAAQ-----  | LFLCSLGLKV  |
| Mus_musculus    | DLHTEQCIAD       | KSIADCVEAL  | LGCYLTSCGE | RAAQ-----  | LFLCSLGLKV  |
| Gallus_gallus   | DLHTEQCIAD       | KSIADCVEAL  | LGCYLTSCGE | RAAQ-----  | LFLCSLGLKV  |
| Xenopus_tropica | DLHTEQCIAD       | KSIADCVEAL  | LGCYLTSCGE | RAAQ-----  | LFLCSLGLKV  |
| Danio_rerio     | DLHTEQCIAD       | KSIADCVEAL  | LGCYLTSCGE | RAAQ-----  | LFLCSLGLKV  |
| Caenorhabditis  | NLLTQQHISD       | KSIADAVEAL  | IGVHLLTLGP | NPTL-----  | KVMNWMGLKV  |
| Drosophila_mela | NLVSQHSIPD       | KSIADCVEAL  | IGAYLIECGP | RGAL-----  | LFMAWLGV RV |
| Oryza_sativa_Ja | DSSCYRVLSS       | KT LADVVEAL | IGVYYVAGGK | IAAN-----  | HLMKWIGIHA  |
| Arabidopsis_tha | DLSSYRVLSS       | KT LADVVEAL | IGVYYVEGGK | IAAN-----  | HLMKWIGIHV  |
| Neurospora_cras | -----HVLAD       | KSIADVCEAL  | IGAAYLTGQE | KGSF-----D | MAIKAVTAMV  |
| Chaetomium_glob | -----HVLAD       | KTIADVCEAL  | IGAAYLTAQE | QTPP-----N | FDLAIRAVTV  |
| Coccidioides_im | -----            | KTIADVCEAL  | IGACCLLASK | NHRF-----D | IAVKAVTALV  |
| Aspergillus_nig | -----HALAE       | KTIADVCEAL  | IGAALLSGGP | DHRF-----D | MAVKAVTTLV  |
| Aspergillus_fum | -----HALGE       | KTIADVCEAL  | IGASLLSGGP | EHRF-----D | MATKAVSALV  |
| Aspergillus_cla | -----HALGE       | KTIADVCEAL  | IGACLLSGGP | EHRF-----D | MGVKAVSVFV  |

|                 |            |     |       |  |            |            |            |             |
|-----------------|------------|-----|-------|--|------------|------------|------------|-------------|
| Phaeosphaeria_n | ---        | HN  | LG    |  | KSVADVCEAF | IGAAFMQHHK | GGQWTPNDWD | EAVKAVKLFA  |
| Schizosaccharom | ---        | VL  | QKLSV |  | KRIADMVEAS | IGACLLDSGL | DSAL       | KICKSLSVGL  |
| Emericella_nidu | ---        | STR | MSA   |  | KVLADVVEAL | IGAAYIDGGL | HKAQ       | SCIIVRFLPEI |
| Cryphonectria_p | ---        | SKR | ILSP  |  | KTADVVEAL  | IGVSFVDGGL | PKAL       | ECIRLFIPEI  |
| Neosartorya_fis | ---        | AKR | QMST  |  | KVLADVVEAL | IGAAYMDGGH | ATAQ       | ACIRRLLEPEI |
| Candida_albican | ---        |     |       |  |            |            |            |             |
| Kluyveromyces_l | ---        |     |       |  |            |            |            |             |
| Schizosaccharom | ---        |     |       |  |            |            |            |             |
| Consistency     | 1102142544 |     |       |  | 7567745776 | 6743444353 | 3342000000 | 3353353436  |

|                 |            |            |               |             |            |      |
|-----------------|------------|------------|---------------|-------------|------------|------|
|                 |            | 2510       | 2520          | 2530        | 2540       | 2550 |
| Homo_sapiens    | LPVIKRTDRE | KALCPTRENF | NSQQKNLSVS    | CAAASVASSR  | SSVLKDSEYG |      |
| Bos_taurus      | LPVIKRTDRE | KAMCPTRENF | TSQQKNLSGS    | RAAASGAGYR  | ASVLKDLEYG |      |
| Mus_musculus    | LPVIKRTSRE | KALDPAQENG | SSQQKSLSGS    | C - AAPVGPR | SSAGKDLEYG |      |
| Gallus_gallus   | LPVIKRTDWE | STLCATGENC | NSEQKNLSPN    | SVSACIVNSE  | PSLYKDLEYG |      |
| Xenopus_tropica | LPEVRKLVNT | TNVISASS - | -SYQNSTRDN    | CTLTARTNTD  | LSSCKGIDYG |      |
| Danio_rerio     | LPPEKQSSGG | SA         |               |             | ELQYG      |      |
| Caenorhabditis  | IQKDQ      |            | - - - KSDVPSP | LLRFIDTPTN  | PNASL      |      |
| Drosophila_mela | LPITR      |            | - - - QLDGGNQ | EQRIPGSTKP  | NAENVVTVYG |      |
| Oryza_sativa_Ja |            |            |               |             | ELDPE      |      |
| Arabidopsis_tha |            |            |               |             | EDDPD      |      |
| Neurospora_cras | -K-        |            |               | DKK         | HRMISYGDY  |      |
| Chaetomium_glob | MVK        |            |               | DKN         | HTMTSYSDY  |      |
| Coccidioides_im | -S-        |            |               | SDD         | HNVLNWEQYS |      |
| Aspergillus_nig | -N-        |            |               | SPS         | HKAERWKDYI |      |
| Aspergillus_fum | -D-        |            |               | SPS         | HRVSCWKEYI |      |
| Aspergillus_cla | -D-        |            |               | SPS         | HAVSRWKEYI |      |
| Phaeosphaeria_n | -N-        |            |               | SDD         | HLMEKWTDY  |      |
| Schizosaccharom |            |            |               |             | LDISNWDEW  |      |
| Emericella_nidu |            |            |               |             | ELPETKLPR  |      |
| Cryphonectria_p |            |            |               |             | QPRPFSEVR  |      |
| Neosartorya_fis |            |            |               |             | NLHAVDTRT  |      |
| Candida_albican |            |            |               |             |            |      |
| Kluyveromyces_l |            |            |               |             |            |      |
| Schizosaccharom |            |            |               |             |            |      |
| Consistency     | 1010000000 | 0000000000 | 0000000000    | 0000000111  | 1221222442 |      |

|                 |            |            |            |            |            |      |
|-----------------|------------|------------|------------|------------|------------|------|
|                 |            | 2560       | 2570       | 2580       | 2590       | 2600 |
| Homo_sapiens    | CLKIPPRCMF | D-HPDADKTL | NHLISGFENF | EKKINYRFKN | KAYLLQAFTH |      |
| Bos_taurus      | CLKIPPRCMF | D-HPEADRTL | RHLISGFENF | EKKINYRFKN | KAYLLQAFTH |      |
| Mus_musculus    | CLKIPPRCMF | D-HPDAEKTL | NHLISGFETF | EKKINYRFKN | KAYLLQAFTH |      |
| Gallus_gallus   | CLKIPPRCMF | D-HPDAEKTL | NHLISGFENF | EKKINYSFKN | KAYLLQAFTH |      |
| Xenopus_tropica | YLKIPPRCMF | E-HPDAEKTL | DHLISGFENF | EKKINYPFKN | KAYLLQAFTH |      |
| Danio_rerio     | WLKIPPRCMF | E-HPDAERTL | NHLISGFLNF | ESKINYTFKN | KAYLLQAFTH |      |
| Caenorhabditis  |            | -N-FLNN    | LWQQFQFTQL | EEKIGYRFKE | RAYLVQAFTH |      |
| Drosophila_mela | AWPTPRSPIL | HFAPNATEEL | DQLLSGFEEF | EESLGYKFRD | RSYLLQAMTH |      |
| Oryza_sativa_Ja | EIPPPK -PY | -DIPES     | IMRSINFDTL | KGVLGIEFQN | KGLLVEAITH |      |
| Arabidopsis_tha | EVDGTLKNV  | -NVPES     | VLKSIDFVGL | ERALKYEFKE | KGLLVEAITH |      |
| Neurospora_cras | AVYQKPTWQ  | -TESAN     | SAQRDMAKKF | SERMGYKFKH | PRLLRSAFQH |      |
| Chaetomium_glob | AAYSPPAWQ  | -TAPCN     | STQLDMAARF | EARMGYAFTH | PRLLRSAFQH |      |
| Coccidioides_im | RLYSIPKYQ  | -TAVVD     | AAELDLAAQV | KKKLGYDFKY | PKLLRSFATH |      |
| Aspergillus_nig | SFYTIPKYQ  | -RRAAD     | GAELYLSRKI | EEKLSYRFRY | PTLLGSAFTH |      |
| Aspergillus_fum | TLYTLPKYQ  | -TEKHR     | GSEDDLARHV | EEELGYHFY  | PRLLASAITH |      |
| Aspergillus_cla | GLYKPPNYQ  | -VRKAE     | GAETNLALQV | EEKLGYHFY  | PRLLCFAVTH |      |
| Phaeosphaeria_n | AAYTKPKYQ  | -TAGAT     | ATQLDLAHKI | EMKHPYRFRY | PRLLRSAFIH |      |
| Schizosaccharom | NNYFDLNTY  | -ADSLR     | NVQFPYSSYI | EETIGYSFKN | KKLLHLAFIH |      |
| Emericella_nidu | PESMPMSKD  | -H -K      | KPHLIQENL  | ENHIGYTFKD | KTLLMEALTH |      |
| Cryphonectria_p | DILFGAAEP  | -K -G      | MKLPADLQLL | EQLIEYSFCE | KALLVEAVTH |      |
| Neosartorya_fis | ATRSVAPES  | -A -       | -RHMMNERL  | KDHIGYTFED | ESLLVEALTH |      |
| Candida_albican |            |            |            |            |            |      |
| Kluyveromyces_l |            |            |            |            |            |      |
| Schizosaccharom |            |            |            |            |            |      |
| Consistency     | 2322333230 | 0000032222 | 2233323334 | 6445473743 | 4457347557 |      |

|                 |           |            |             |            |            |      |
|-----------------|-----------|------------|-------------|------------|------------|------|
|                 |           | 2610       | 2620        | 2630       | 2640       | 2650 |
| Homo_sapiens    | ASYHYNTIT | -DCYQRLEFL | GDAILDYELIT | KHLYEDPRQH | SPGVLTDLRS |      |
| Bos_taurus      | ASYHYNTIT | -DCYQRLEFL | GDAILDYELIT | KHLYEDPRQH | SPGVLTDLRS |      |
| Mus_musculus    | ASYHYNTIT | -DCYQRLEFL | GDAILDYELIT | KHLYEDPRQH | SPGVLTDLRS |      |
| Gallus_gallus   | ASYHYNTIT | -DCYQRLEFL | GDAILDYELIT | KHLYEDPRQH | SPGVLTDLRS |      |
| Xenopus_tropica | ASYHYNTIT | -DCYQRLEFL | GDAILDYELIT | KHLYEDPRQH | SPGVLTDLRS |      |
| Danio_rerio     | ASYHYNTIT | -DCYQRLEFL | GDAILDYELIT | KHLYEDPRQH | SPGVLTDLRS |      |
| Caenorhabditis  | ASYINNRTV | -GCYQRLEFL | GDAVLDMYIT  | RYLFEDSRQY | SPGVLTDLRS |      |
| Drosophila_mela | ASYTPNRLT | -DCYQRLEFL | GDAVLDMYIT  | RHLYEDPRQH | SPGALTDLRS |      |
| Oryza_sativa_Ja | ASRPSSGVS | -CYQRLEFV  | GDAVLDMYIT  | RHLFFTYTDL | PPGRLTDLRA |      |
| Arabidopsis_tha | ASRPSSGVS | -CYQRLEFV  | GDAVLDMYIT  | RHLFFTYTSL | PPGRLTDLRA |      |

|                 |            |            |            |             |            |            |
|-----------------|------------|------------|------------|-------------|------------|------------|
| Neurospora_cras | PTYP       | SLYERL     | -PSYQRLEFL | GDALFDMVAV  | DYLFRKFPA  | DPQWLTEHKM |
| Chaetomium_glob | PTYP       | SVYEKL     | -PSYQRLEFL | GDALLDMASV  | EFLFHRFPGA | DPQWLTEHKM |
| Coccidioides_im | PSYP       | SAWARV     | -PCYQRLEFL | GDALLDMACV  | EHYHKHPDK  | DPQWLTEHKM |
| Aspergillus_nig | PSYP       | SAWAKV     | -PCYQRLEFL | GDSLIDMVCV  | EDLFARFPDR | DPQWLTEHKM |
| Aspergillus_fum | PSLP       | STWGYR     | VPCYQRLEFL | GDSLIDMVCV  | EDLFRRFPDR | DPQWLSEHKM |
| Aspergillus_cla | PSTP       | STWYFR     | VPCYQRLEFL | GDSLIDMVCV  | EDLFHRFPDR | DPQWLTEHKM |
| Phaeosphaeria_n | PSQP       | FMWENI     | -PSYQRLEFL | GDSLIDMAFI  | MHLFYKYPDK | DPQWLTEHKT |
| Schizosaccharom | PSMM       | SQGGIY     | -ENYQQLEFL | GDAVLDDYIIV | QYLYKKYPNA | TSGELTDYKS |
| Emericella_nidu | PSCP       | -YDTSI     | -QSYQRLEFL | GDAVLDDMLIV | DLIRAHHVEC | QQGEMTKIKH |
| Cryphonectria_p | PSYN       | -VSGTV     | -ACYDRLEFI | GDAILDYIIV  | EEVFALEPAL | ENWQMHLIRT |
| Neosartorya_fis | PSCD       | -YDSTT     | -QSYQRLEYL | GDAVLDDMVIV | SAIFNHPIQR | PQGDMTKIKH |
| Candida_albican | -          | -          | -          | -           | -          | -          |
| Kluyveromyces_l | -          | -          | -          | -           | -          | -          |
| Schizosaccharom | -          | -          | -          | -           | -          | -          |
| Consistency     | 4743232330 | 0357777776 | 7766774545 | 4365332343  | 4542765464 |            |

|                 |            |            |            |            |            |      |
|-----------------|------------|------------|------------|------------|------------|------|
|                 | .....      | 2660.....  | 2670.....  | 2680.....  | 2690.....  | 2700 |
| Homo_sapiens    | ALVNNTIFAS | LAVKYDYHKY | FKAVS      | -          | -          | -    |
| Bos_taurus      | ALVNNTIFAS | LAVKYDYHKY | FKAVS      | -          | -          | -    |
| Mus_musculus    | ALVNNTIFAS | LAVKYDYHKY | FKAVS      | -          | -          | -    |
| Gallus_gallus   | ALVNNTIFAS | LAVKYDYHKY | FKAVS      | -          | -          | -    |
| Xenopus_tropica | ALVNNTIFAS | LAVKYDYHKY | FKAIS      | -          | -          | -    |
| Danio_rerio     | ALVNNTIFAS | LAVKYDYHKY | FKAVS      | -          | -          | -    |
| Caenorhabditis  | ALVNNTIFAS | LAVKFEFQKH | FIAMC      | -          | -          | -    |
| Drosophila_mela | ALVNNTIFAS | LAVRHGFHGF | FRHLS      | -          | -          | -    |
| Oryza_sativa_Ja | AAVNNENFAR | VAVKHKLHVH | LRHGS      | -          | -          | -    |
| Arabidopsis_tha | AAVNNENFAR | VAVKHKLHLY | LRHGS      | -          | -          | -    |
| Neurospora_cras | AMVSNQFLCC | LSFHLGFNKC | IATMS      | -          | -          | -    |
| Chaetomium_glob | AMVSNQFLGC | LAVYLGPHRA | ISYCA      | -          | -          | -    |
| Coccidioides_im | AMVSNKFLGS | VAVRLGLHSH | LNHFS      | -          | -          | -    |
| Aspergillus_nig | AMVSNKFLGA | LAVKLGLHSH | LKYFS      | -          | -          | -    |
| Aspergillus_fum | AMVSNKFLGA | LSVKLGPHRR | IMAFS      | -          | -          | -    |
| Aspergillus_cla | AMVSNKFLGA | LAVKLGFHKK | IKAFS      | -          | -          | -    |
| Phaeosphaeria_n | PMVSNKFLGA | VCVKLGWHTH | MKQNT      | -          | -          | -    |
| Schizosaccharom | FYVCNKSLSY | IGFVLNLHKY | IQH        | -          | -          | -    |
| Emericella_nidu | AIVNGHLLAF | LCMQFKWAMP | SPLTPSIDTG | TETETE---  | IISPPPKTIS |      |
| Cryphonectria_p | ALVNADILGF | LIMEWSYKQM | GFEVCRANEG | DSDSKSSGDS | TSDKASPRLE |      |
| Neosartorya_fis | AVVNANLLAF | LCMESATSEE | KLDVAQ     | -          | -TSKDSFAVT |      |
| Candida_albican | -          | -          | -          | -          | -          | -    |
| Kluyveromyces_l | -          | -          | -          | -          | -          | -    |
| Schizosaccharom | -          | -          | -          | -          | -          | -    |
| Consistency     | 6575634553 | 6554334543 | 3333400000 | 0000000000 | 0000000000 |      |

|                 |            |            |            |            |            |      |
|-----------------|------------|------------|------------|------------|------------|------|
|                 | .....      | 2710.....  | 2720.....  | 2730.....  | 2740.....  | 2750 |
| Homo_sapiens    | -          | ---PELFHV  | IDDFVQFQLE | KNEMQGMDS  | LRR---     | SE-  |
| Bos_taurus      | -          | ---PELFHV  | IDDFVQFQLE | KNEMQGMDS  | LRR---     | SE-  |
| Mus_musculus    | -          | ---PELFHV  | IDDFVQFQLE | KNEMQGMDS  | LRR---     | SE-  |
| Gallus_gallus   | -          | ---PELFHV  | IDDFVQFQME | KNEMQGMDS  | LRR---     | SE-  |
| Xenopus_tropica | -          | ---PELFHV  | IDDFVQFQLE | KNEMQGMDS  | LRR---     | SE-  |
| Danio_rerio     | -          | ---PELFHV  | IDDFVQFQLE | KNEMQGMDS  | LRR---     | SE-  |
| Caenorhabditis  | -          | ---PGLYHM  | IEKFVKLCSE | RNFDTNFNAE | MYMVTTEE-  |      |
| Drosophila_mela | -          | ---PGLNDV  | IDRFVRIQQE | NGHCISEEY  | LLS---     | EEE- |
| Oryza_sativa_Ja | -          | ---SALETQ  | IREFVKDVQE | ELLKPGFN-  | -          | -    |
| Arabidopsis_tha | -          | ---SALEKQ  | IREFVKEVQT | ESSKPGFN-  | -          | -    |
| Neurospora_cras | -          | ---PSILKD  | IAEYVTEIEE | ALETAKQEI  | NAGKTADY-  |      |
| Chaetomium_glob | -          | ---SAIQKE  | ITEYVTEIED | ALQSARDDAS | KTPCNRHAT  |      |
| Coccidioides_im | -          | ---TSLQSQ  | ITNYVEEIEA | AELESGDPP- | -          | -    |
| Aspergillus_nig | -          | ---APLQSQ  | ITQYAEIEIQ | AEGESEGAV- | -          | -    |
| Aspergillus_fum | -          | ---NPLQSQ  | ITHYVEEIEE | AQAESQGAV- | -          | -    |
| Aspergillus_cla | -          | ---NPLQSQ  | ITYYVEEIEE | AEAESGAV-  | -          | -    |
| Phaeosphaeria_n | -          | ---AILSSQ  | IRDYVVEVEE | AEREANGAV- | -          | -    |
| Schizosaccharom | -          | -          | ESAAMCDA   | IFEYQELIEA | FRETAS---  |      |
| Emericella_nidu | LYSYLRYS   | RPLPLHVEPE | SGSSNALTRH | NLLCPSILHA | LNNTTA---  |      |
| Cryphonectria_p | QTEVPILPWS | FMRQSSAELT | MEREITKARF | EELRDPILHA | MRSPTH---  |      |
| Neosartorya_fis | TSQESVELWR | FMRYRGQNLN | AARDASLARH | RAIRDEIASS | LLHAPH---  |      |
| Candida_albican | -          | -          | -          | -          | -          | -    |
| Kluyveromyces_l | -          | -          | -          | -          | -          | -    |
| Schizosaccharom | -          | -          | -          | -          | -          | -    |
| Consistency     | 0000000000 | 0000325223 | 5334533334 | 3332332321 | 2110000110 |      |

|               |       |            |            |            |            |      |
|---------------|-------|------------|------------|------------|------------|------|
|               | ..... | 2760.....  | 2770.....  | 2780.....  | 2790.....  | 2800 |
| Homo_sapiens  | -     | -EDEEKEEDI | EVPKAMGDIF | ESLAGAIYMD | SGMSLETWVQ |      |
| Bos_taurus    | -     | -EDEEKEEDI | EVPKAMGDIF | ESLAGAIYMD | SGMSLETWVQ |      |
| Mus_musculus  | -     | -EDEEKEEDI | EVPKAMGDIF | ESLAGAIYMD | SGMSLEVWVQ |      |
| Gallus_gallus | -     | -EDEEKEEDI | EVPKAMGDIF | ESLAGAIYMD | SGMSLEMVWQ |      |

|                 |            |            |            |             |            |
|-----------------|------------|------------|------------|-------------|------------|
| Xenopus_tropica | -----      | -EDEEKEEDI | EVPKAMGDIF | ESLAGAIYMD  | SGMSLETVWH |
| Danio_rerio     | -----      | -EDEEKEEDI | EVPKAMGDIF | ESLAGAIYMD  | SGMSLETVWQ |
| Caenorhabditis  | -----      | -IDEGQEEDI | EVPKAMGDIF | ESVAGAIYLD  | SGRNLDTTWQ |
| Drosophila_mela | -----      | -CD--DAEDV | EVPKALGDVF | ESIAGAIFLD  | SNMSLDVVWH |
| Oryza_sativa_Ja | -----      | ---SFGLGDC | KAPKVLGDIV | ESIAGAIFLD  | SGYDTSVVWK |
| Arabidopsis_tha | -----      | ---SFGLGDC | KAPKVLGDIV | ESIAGAIFLD  | SGKDTTAAWK |
| Neurospora_cras | -----SR    | DYWVHITHAS | RLPKCLSDVV | EAYIGAI FVD | SEYDYSVVQN |
| Chaetomium_glob | PSPGDLPAES | FARDFWVRCS | RPPKCLPDVV | EAYVGAVFVD  | SRYDFARVRA |
| Coccidioides_im | -----      | ---DAWTLTS | DPPKCLPDMV | EAYIGAI FID | SGFSFEVVEE |
| Aspergillus_nig | -----      | ---DYWTVTK | DPPKCLPDMV | EAYVGAVFVD  | SDFNFEVIER |
| Aspergillus_fum | -----      | ---DYWVVAK | DPPKCLPDMV | EAYLGAI FVD | SKFDFQVIEA |
| Aspergillus_cla | -----      | ---DYWVVAK | DPPKCLPDMV | EAYLGAI FVD | SDFSFEVIEA |
| Phaeosphaeria_n | -----      | ---DYWVSVS | EPPKCLADVI | EAFVAAI FVD | SEFDFNVVQK |
| Schizosaccharom | -----      | -ENPFWFWEI | DSPKFISDTL | EAMICAIFLD  | SGFSLQSLQF |
| Emericella_nidu | -----      | -YPWSLFSAI | HADKFFSDVV | ESIIGAI FVD | SGGDLGACAG |
| Cryphonectria_p | -----      | -YPWALFARL | HAQKFYSDF  | EALVGAIWVD  | AGPGFDACRA |
| Neosartorya_fis | -----      | -YPWHALSRL | NADKFFSDIV | ESVLGAI FVD | SGGDLAPCEV |
| Candida_albican | -----      | -----      | -----      | -----       | -----      |
| Kluyveromyces_l | -----      | -----      | -----      | -----       | -----      |
| Schizosaccharom | -----      | -----      | -----      | -----       | -----      |
| Consistency     | 0000000000 | 0113223333 | 4367354754 | 7644677657  | 7434444533 |

|                 |            |       |             |            |       |       |             |            |        |      |
|-----------------|------------|-------|-------------|------------|-------|-------|-------------|------------|--------|------|
|                 | .....      | 2810. | .....       | 2820.      | ..... | 2830. | .....       | 2840.      | .....  | 2850 |
| Homo_sapiens    | VYYPMM     | ---   | RPLIEKFSAN  | V          | ---   | P     | RSPVRELLEM  | EPETAKFS   | --     |      |
| Bos_taurus      | VYYPMM     | ---   | RPLIEKFSAN  | V          | ---   | P     | RSPVRELLEM  | EPEITKFS   | --     |      |
| Mus_musculus    | VYYPMM     | ---   | QPLIEKFSAN  | V          | ---   | P     | RSPVRELLEM  | EPETAKFS   | --     |      |
| Gallus_gallus   | VYYPMM     | ---   | RPLIEKFSAN  | V          | ---   | P     | RSPVRELLEM  | EPETAKFS   | --     |      |
| Xenopus_tropica | VYYPMM     | ---   | QPLIEKFSAN  | V          | ---   | P     | RSPVRELLEM  | EPETAKFS   | --     |      |
| Danio_rerio     | VYYPMM     | ---   | RPLIEKFSAN  | V          | ---   | P     | RSPVRELLEM  | EPETAKFS   | --     |      |
| Caenorhabditis  | VIFHMM     | ---   | RGTIELCCAN  | P          | ---   | P     | RSPIRELMEF  | EQSKVRFS   | --     |      |
| Drosophila_mela | VYSNMM     | ---   | SPEIEQFSNS  | V          | ---   | P     | KSPIRELLEL  | EPETAKFG   | --     |      |
| Oryza_sativa_Ja | VFQPLL     | ---   | HPMVTPETLP  | M          | ---   | HP    | VRELQERCQQ  | QAEGLEY    | ---    |      |
| Arabidopsis_tha | VFQPLL     | ---   | QPMVTPETLP  | M          | ---   | HP    | VRELQERCQQ  | QAEGLEY    | ---    |      |
| Neurospora_cras | FFNMHV     | ---   | LPFFEDMHLY  | DTF        | --    | ANKHP | VTFFVANMAH  | KFRCNEWRSF |        |      |
| Chaetomium_glob | FFADHV     | ---   | RPFFEDMRLY  | DAF        | --    | ANKHP | VTFLAGIMQG  | RMRCAEWRL  | L      |      |
| Coccidioides_im | FFQKFL     | ---   | KKHFEDMTIY  | DTY        | --    | ANKHP | TTYLHNRLAI  | DFGCSNYCL  | -      |      |
| Aspergillus_nig | FFRDYI     | ---   | KPFFEDMAIY  | DTF        | --    | ANKHP | TTFLHNRLTN  | EFGCVNYCL  | -      |      |
| Aspergillus_fum | FFERQI     | ---   | KPFFEDMSIY  | DTF        | --    | ANKHP | TTFLHNKLTN  | EYGCTNYCL  | -      |      |
| Aspergillus_cla | FFQAQI     | ---   | KPYFQDMSIY  | DTF        | --    | ANKHP | TTFLHNRLAN  | EFGCTNYCL  | -      |      |
| Phaeosphaeria_n | FFDLHL     | ---   | KPFFLDMTLD  | AYENFASNHP |       |       | TTRL SRLLSI | NFGCSEWRMG |        |      |
| Schizosaccharom | VLPLFL     | ---   | NSLGDATAHTK | -A         | ---   | KGDI  | EHKVYQLLKD  | QGCEDFGTKC |        |      |
| Emericella_nidu | FIERLGLVRI |       | AKRILDERVD  | -V         | ---   | THPT  | QRAQIELQKL  | AARLGCNDGF |        |      |
| Cryphonectria_p | FVARSGV    | --L   | PYLKRLLRDQ  | VH         | ---   | VLHP  | KEELGRLAGR  | ERVE       | --YVVK |      |
| Neosartorya_fis | FVERIGL    | --M   | AYLRRILDQE  | ID         | ---   | VRHP  | RSVAQQLAKT  | NIQF       | --VLQR |      |
| Candida_albican |            |       |             |            |       |       |             |            |        |      |
| Kluyveromyces_l |            |       |             |            |       |       |             |            |        |      |
| Schizosaccharom |            |       |             |            |       |       |             |            |        |      |
| Consistency     | 4432340000 |       | 3434433433  | 2000001126 |       |       | 3425344542  | 5232334200 |        |      |

|                 |            |            |            |            |              |            |            |       |
|-----------------|------------|------------|------------|------------|--------------|------------|------------|-------|
|                 | .....      | 2860.....  | 2870.....  | 2880.....  | 2890.....    | 2900       |            |       |
| Homo_sapiens    | -----      | -----      | PA         | ERTYDG     | -----        | KVRVTVEVV  | G          | ----- |
| Bos_taurus      | -----      | -----      | PA         | ERTYDG     | -----        | KVRVTVEVV  | G          | ----- |
| Mus_musculus    | -----      | -----      | PA         | ERTYDG     | -----        | KVRVTVEVV  | G          | ----- |
| Gallus_gallus   | -----      | -----      | PA         | ERTYDG     | -----        | KVRVTVEVV  | G          | ----- |
| Xenopus_tropica | -----      | -----      | PA         | ERTYDG     | -----        | KVRVTVEVV  | G          | ----- |
| Danio_rerio     | -----      | -----      | PA         | ERTYDG     | -----        | KVRVTVEVV  | G          | ----- |
| Caenorhabditis  | -----      | -----      | KM         | ERILESG    | -----        | KVRVTVEVV  | N          | ----- |
| Drosophila_mela | -----      | -----      | KP         | EKLADGR    | -----        | RVRVTVDVF  | C          | ----- |
| Oryza_sativa_Ja | -----      | -----      | KA         | SRAGN      | -----        | IATVEVFVD  | G          | ----- |
| Arabidopsis_tha | -----      | -----      | KA         | SRSGN      | -----        | TATVEVFID  | G          | ----- |
| Neurospora_cras | AKELDTDVTE | GRGGRGGNGA | VAGEISEINP | PKVVSALLVH | G            | -----      | -----      | ----- |
| Chaetomium_glob | VKDLPP     | -----      | VV         | GAGAGTELET | PQVVC AVR VH | G          | -----      | ----- |
| Coccidioides_im | -----      | -----      | KA         | GEVPYVDGPG | TRVLA AVIVH  | D          | -----      | ----- |
| Aspergillus_nig | -----      | -----      | KA         | GEMPSIDGAP | AGVLA AVIVH  | D          | -----      | ----- |
| Aspergillus_fum | -----      | -----      | KA         | GELPTIDGAP | ATVLA AVIVH  | G          | -----      | ----- |
| Aspergillus_cla | -----      | -----      | KA         | GEMPAIDGMP | AGVLA AVIVH  | N          | -----      | ----- |
| Phaeosphaeria_n | -----      | -----      | AL         | ETETLIPGKG | KAIAAMVMIH   | D          | -----      | ----- |
| Schizosaccharom | V          | -----      | IE         | EVKSSHK    | -----        | TLLNTELHLT | K          | ----- |
| Emericella_nidu | RFEC       | -----      | RT         | VRDLSSG    | -----        | KRKTLEVDIN | DHYGDEDPAV | ----- |
| Cryphonectria_p | -----      | -----      | ET         | LKDDGDG    | -----        | KEWACEVRVG | G          | ----- |
| Neosartorya_fis | -----      | -----      | VP         | NEEGG      | -----        | ASYQCSVRIE | Q          | ----- |
| Candida_albican | -----      | -----      | -----      | -----      | -----        | -----      | -----      | ----- |
| Kluyveromyces_l | -----      | -----      | -----      | -----      | -----        | -----      | -----      | ----- |
| Schizosaccharom | -----      | -----      | -----      | -----      | -----        | -----      | -----      | ----- |
| Consistency     | 0000000000 | 0000000034 | 3422321000 | 0353447272 | 4000000000   | -----      | -----      | ----- |



|                 | 2910         | 2920       | 2930       | 2940       | 2950       |
|-----------------|--------------|------------|------------|------------|------------|
| Homo_sapiens    | KG KFKG      |            | --VGRS--Y  | RIAKSAAARR |            |
| Bos_taurus      | KG KFKG      |            | --VGRS--Y  | RIAKSAAARR |            |
| Mus_musculus    | KG KFKG      |            | --VGRS--Y  | RIAKSAAARR |            |
| Gallus_gallus   | KG KFKG      |            | --VGRS--Y  | RIAKSAAARR |            |
| Xenopus_tropica | KG KFKG      |            | --VGRS--Y  | RIAKSAAARR |            |
| Danio_rerio     | KG KFKG      |            | --VGRS--Y  | RIAKSAAARR |            |
| Caenorhabditis  | NM RFTG      |            | --MGRN--Y  | RIAKATAAKR |            |
| Drosophila_mela | KG TFRG      |            | --IGRN--Y  | RIAKCTAAKC |            |
| Oryza_sativa_Ja | VQ IGVA      |            | --QNPQ--K  | KMAQKLAARN |            |
| Arabidopsis_tha | VQ VGVA      |            | --QNPQ--K  | KMAQKLAARN |            |
| Neurospora_cras | KT VVHA      |            | --VAAS--G  | RYAKSAMAKK |            |
| Chaetomium_glob | LT LAHA      |            | --VAAS--G  | RYGKIAAAKK |            |
| Coccidioides_im | EV VAEG      |            | --VASS--S  | RYAKLKASEA |            |
| Aspergillus_nig | VV IAEG      |            | --TATS--G  | RYAKVKASEK |            |
| Aspergillus_fum | NV ISEA      |            | --RSSS--S  | RYAKITASEK |            |
| Aspergillus_cla | SV VSEA      |            | --TASS--S  | RYAKIRASER |            |
| Phaeosphaeria_n | KV HFHS      |            | --LGQS--G  | RYARVRASHA |            |
| Schizosaccharom | YY GFSFFR--- | ---HGNIVA  | --YGKS-RKV | ANAKYIMKQR |            |
| Emericella_nidu | LGAEGPELTY   | TCTISLATLR | TNQDFGRDLD | DIVVTGCLSK | EDAEIQAANL |
| Cryphonectria_p | R YVTD       |            | --VTGC-LFK | EESRVKAATQ |            |
| Neosartorya_fis | A ELFV       |            | --VTGC-LTA | EEAEVTAAVE |            |
| Candida_albican |              |            |            |            |            |
| Kluyveromyces_l |              |            |            |            |            |
| Schizosaccharom |              |            |            |            |            |
| Consistency     | 000000032    | 333400000  | 000000000  | 0044350003 | 5366336644 |

|                 | 2960        | 2970       | 2980       | 2990        | 3000        |
|-----------------|-------------|------------|------------|-------------|-------------|
| Homo_sapiens    | ALRSLKANQP  |            |            | QVPNS       |             |
| Bos_taurus      | ALRSLKANQP  |            |            | QVPNS       |             |
| Mus_musculus    | ALRSLKANQP  |            |            | QVPNS       |             |
| Gallus_gallus   | ALRSLKANQP  |            |            | QVPNS       |             |
| Xenopus_tropica | ALRSLKANQS  |            |            | QVPNS       |             |
| Danio_rerio     | ALRSLKANQP  |            |            | QVQNN       |             |
| Caenorhabditis  | ALKYLHQIEQ  |            |            | QRRQSPSLTT  |             |
| Drosophila_mela | ALRQLKKQGL  |            |            | IAKKD       |             |
| Oryza_sativa_Ja | ALVVLKEKET  | ATKKEDE--- | RDGEKKNGAQ | MFTRQTLNDI  |             |
| Arabidopsis_tha | ALAALKKEKEI | AESKEKHINN | GNAGEDQGEN | ENGKKNKHQ   | PFTROTTLNDI |
| Neurospora_cras | AIKLLLEGMSV |            |            | EEFRERLGCN  |             |
| Chaetomium_glob | AIQVLEGMDA  |            |            | EAFRKAYGCA  |             |
| Coccidioides_im | ALSKLEGLPP  |            |            | FRFREIYGCN  |             |
| Aspergillus_nig | ALAVLDEISS  |            |            | AEFQRKFRCD  |             |
| Aspergillus_fum | ALAVLDGLLP  |            |            | SEFCQKYRCD  |             |
| Aspergillus_cla | ALVVL DGLLP |            |            | YEFQRQRYNCN |             |
| Phaeosphaeria_n | ALEKLEGLPP  |            |            | YEFRSKYGCD  |             |
| Schizosaccharom | LLKLLLEDKSN |            |            | ---LLLYSCN  |             |
| Emericella_nidu | VIELVGRLES  |            |            | ---GRLYKKN  |             |
| Cryphonectria_p | ACEILKRRK-- |            |            |             |             |
| Neosartorya_fis | AIKFLTRDEG  |            |            | ---STPLNTS  |             |
| Candida_albican |             |            |            |             |             |
| Kluyveromyces_l |             |            |            |             |             |
| Schizosaccharom |             |            |            |             |             |
| Consistency     | 6633743332  | 0000000000 | 0000000000 | 0000000000  | 2213311111  |

|                 | 3010       | 3020       | 3030       | 3040       | 3050        |
|-----------------|------------|------------|------------|------------|-------------|
| Homo_sapiens    |            |            |            |            |             |
| Bos_taurus      |            |            |            |            |             |
| Mus_musculus    |            |            |            |            |             |
| Gallus_gallus   |            |            |            |            |             |
| Xenopus_tropica |            |            |            |            |             |
| Danio_rerio     |            |            |            |            |             |
| Caenorhabditis  | V          |            |            |            |             |
| Drosophila_mela |            |            |            |            |             |
| Oryza_sativa_Ja | CLRRQWPMPQ | YRCVNEGGA  | HAKRFVYSVR | VNTSDRGWTD | ECIGEPMPSPV |
| Arabidopsis_tha | CLRKNNWPMP | YRCVKEGGA  | HAKRFTFGVR | VNTSDRGWTD | ECIGEPMPSPV |
| Neurospora_cras | C          | KGVPMEVDGG | VPEADV---  | ---DG      | EVHGTAV---  |
| Chaetomium_glob | C          | VLGEEEQQA  | QTIATELEV  | PAFSASGLEV | AHHGSAV---  |
| Coccidioides_im | C          | QAGQSEAGNE |            |            |             |
| Aspergillus_nig | C          | RESGDSAR-L | DIGTAI---  |            |             |
| Aspergillus_fum | C          | KETKNSSSVV | EIGTAI---  |            |             |
| Aspergillus_cla | C          | QVVGNPASAP | DIGTAI---  |            |             |
| Phaeosphaeria_n | C          | VDEGEGEAGV | DEAAVSKKVE | L--MR      | EAIGPSI---  |
| Schizosaccharom | CK         | FSKKKPSDEQ | IKGDGKVK-  | LT         |             |
| Emericella_nidu | MD         | LDIDTGVQVD | LDLDMNLDPG | ITT        |             |

|                 |                     |                     |                     |                     |                     |
|-----------------|---------------------|---------------------|---------------------|---------------------|---------------------|
| Cryphonectria_p | -----               | -----               | -----               | -----               | -----               |
| Neosartorya_fis | -----               | -----               | -----               | -----               | -----               |
| Candida_albican | -----               | -----               | -----               | -----               | -----               |
| Kluyveromyces_l | -----               | -----               | -----               | -----               | -----               |
| Schizosaccharom | -----               | -----               | -----               | -----               | -----               |
| Consistency     | 1 0 0 0 0 0 0 0 0 0 | 0 0 0 0 0 0 0 0 0 0 | 0 0 0 0 0 0 0 0 0 0 | 0 0 0 0 0 0 0 0 0 0 | 0 0 0 0 0 0 0 0 0 0 |

..... 3060..... 3070.....

|                 |                     |                     |                 |
|-----------------|---------------------|---------------------|-----------------|
| Homo_sapiens    | -----               | -----               | -----           |
| Bos_taurus      | -----               | -----               | -----           |
| Mus_musculus    | -----               | -----               | -----           |
| Gallus_gallus   | -----               | -----               | -----           |
| Xenopus_tropica | -----               | -----               | -----           |
| Danio_rerio     | -----               | -----               | -----           |
| Caenorhabditis_ | -----               | -----               | -----           |
| Drosophila_mela | -----               | -----               | -----           |
| Oryza_sativa_Ja | KKAKDSAAVL          | L L E L L N R D F P | D K P D G K Q P |
| Arabidopsis_tha | KKAKDSAAVL          | L L E L L N K T F S | -----           |
| Neurospora_cras | -----               | -----               | -----           |
| Chaetomium_glob | -----               | -----               | -----           |
| Coccidioides_im | -----               | -----               | -----           |
| Aspergillus_nig | -----               | -----               | -----           |
| Aspergillus_fum | -----               | -----               | -----           |
| Aspergillus_cla | -----               | -----               | -----           |
| Phaeosphaeria_n | -----               | -----               | -----           |
| Schizosaccharom | -----               | -----               | -----           |
| Emericella_nidu | -----               | -----               | -----           |
| Cryphonectria_p | -----               | -----               | -----           |
| Neosartorya_fis | -----               | -----               | -----           |
| Candida_albican | -----               | -----               | -----           |
| Kluyveromyces_l | -----               | -----               | -----           |
| Schizosaccharom | -----               | -----               | -----           |
| Consistency     | 0 0 0 0 0 0 0 0 0 0 | 0 0 0 0 0 0 0 0 0 0 | 0 0 0 0 0 0 0 0 |

Figure S3. Phylogenetic tree derived from the alignment of Dicer proteins showed in Figure S1.

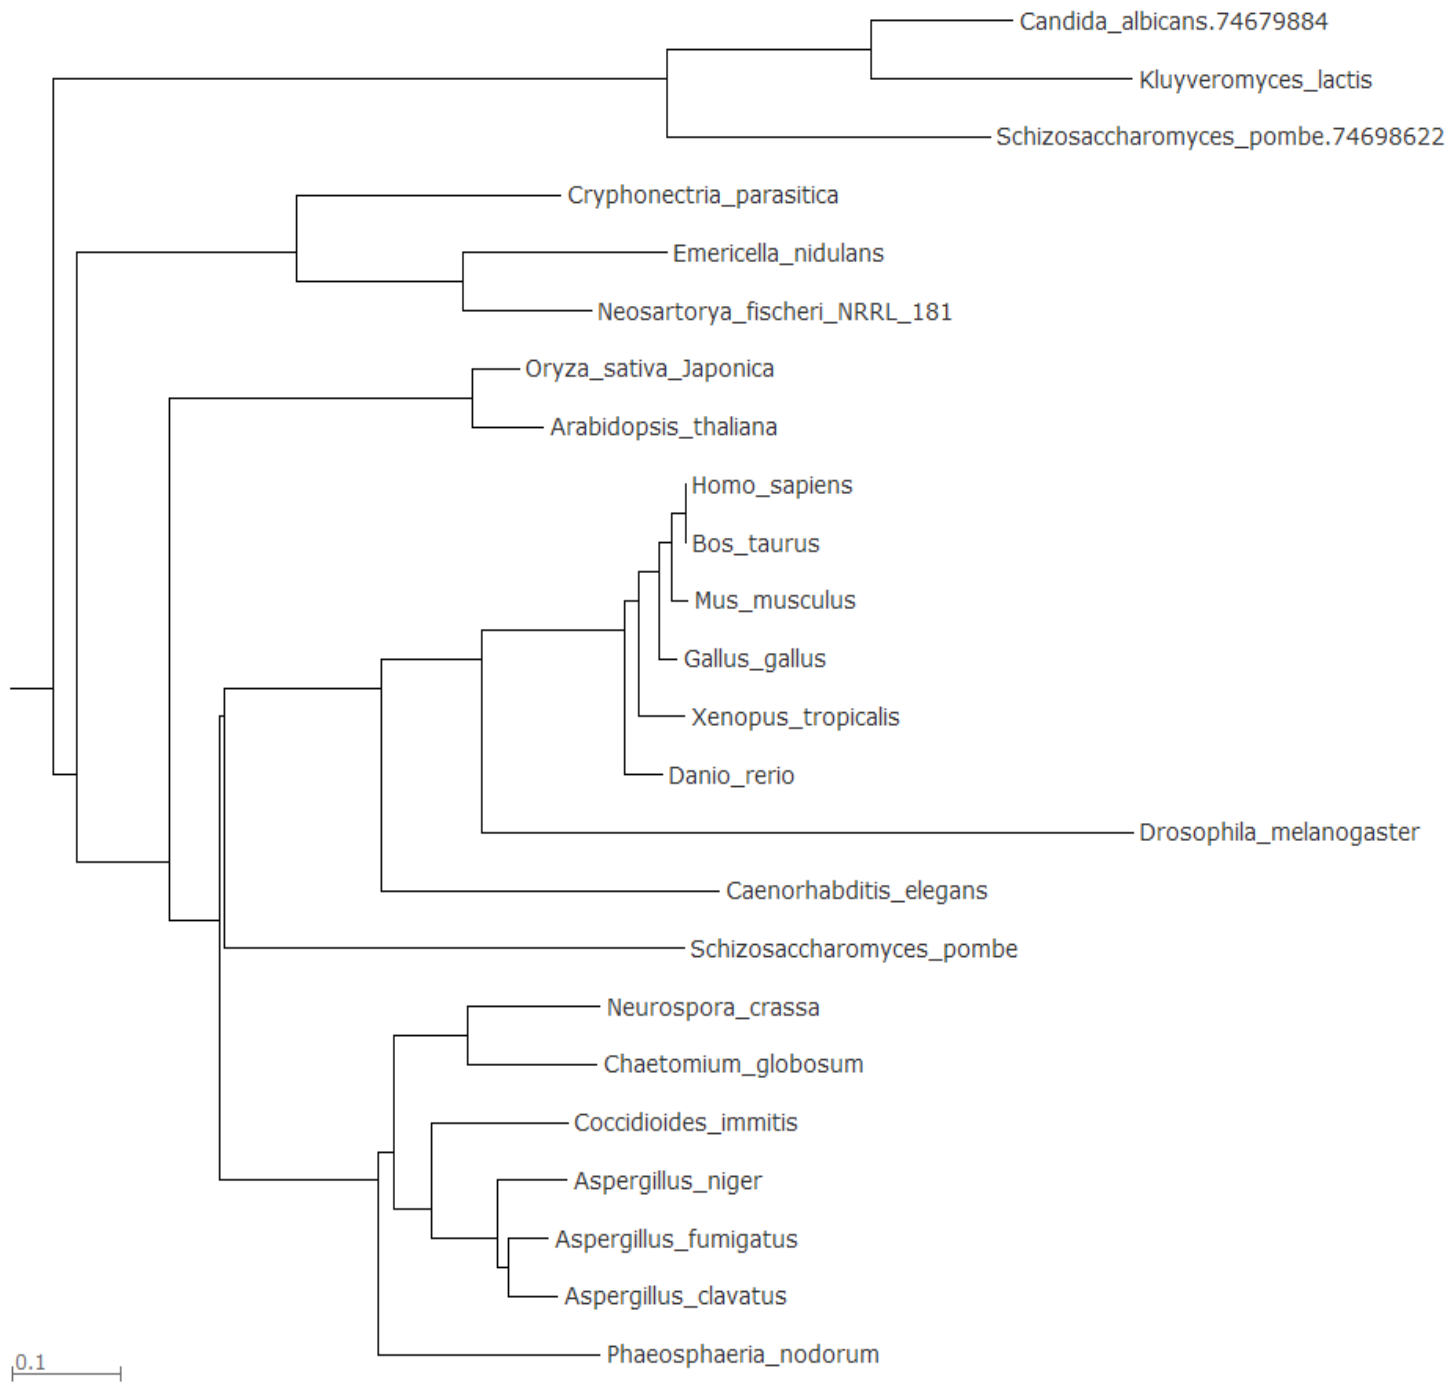



**Figure S4.** Alignment of human argonaute sequences with Multalin software [3,4]. Figure was generated with ESPrpt [5,6] including the secondary structure elements of human AGO2 crystal structure on the top.

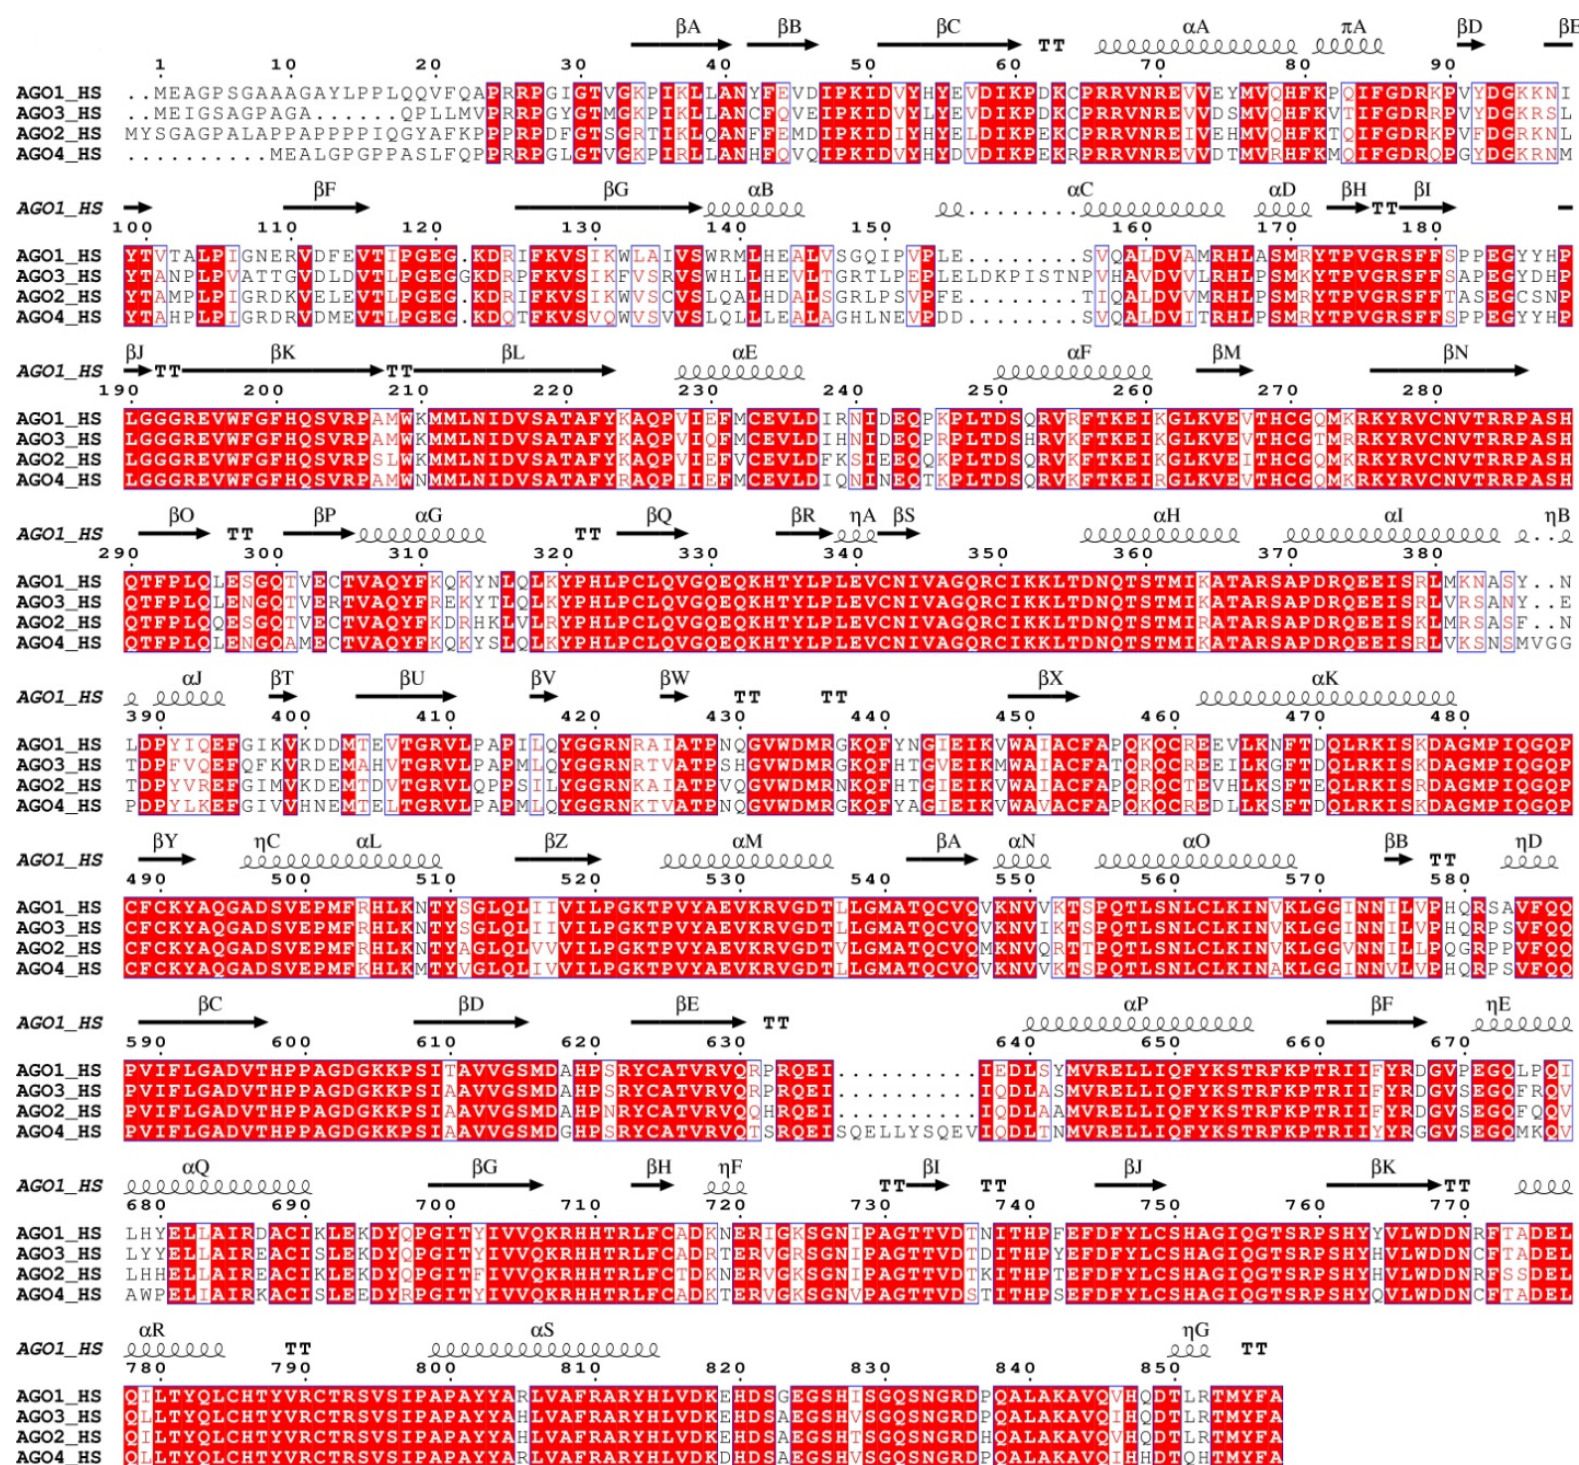

**Figure S5.** Disorder prediction by CSpritz [1] algorithm of human TNRC6 family of proteins. **(a)** TNRC6A, **(b)** TNRC6B and **(c)** TNRC6C.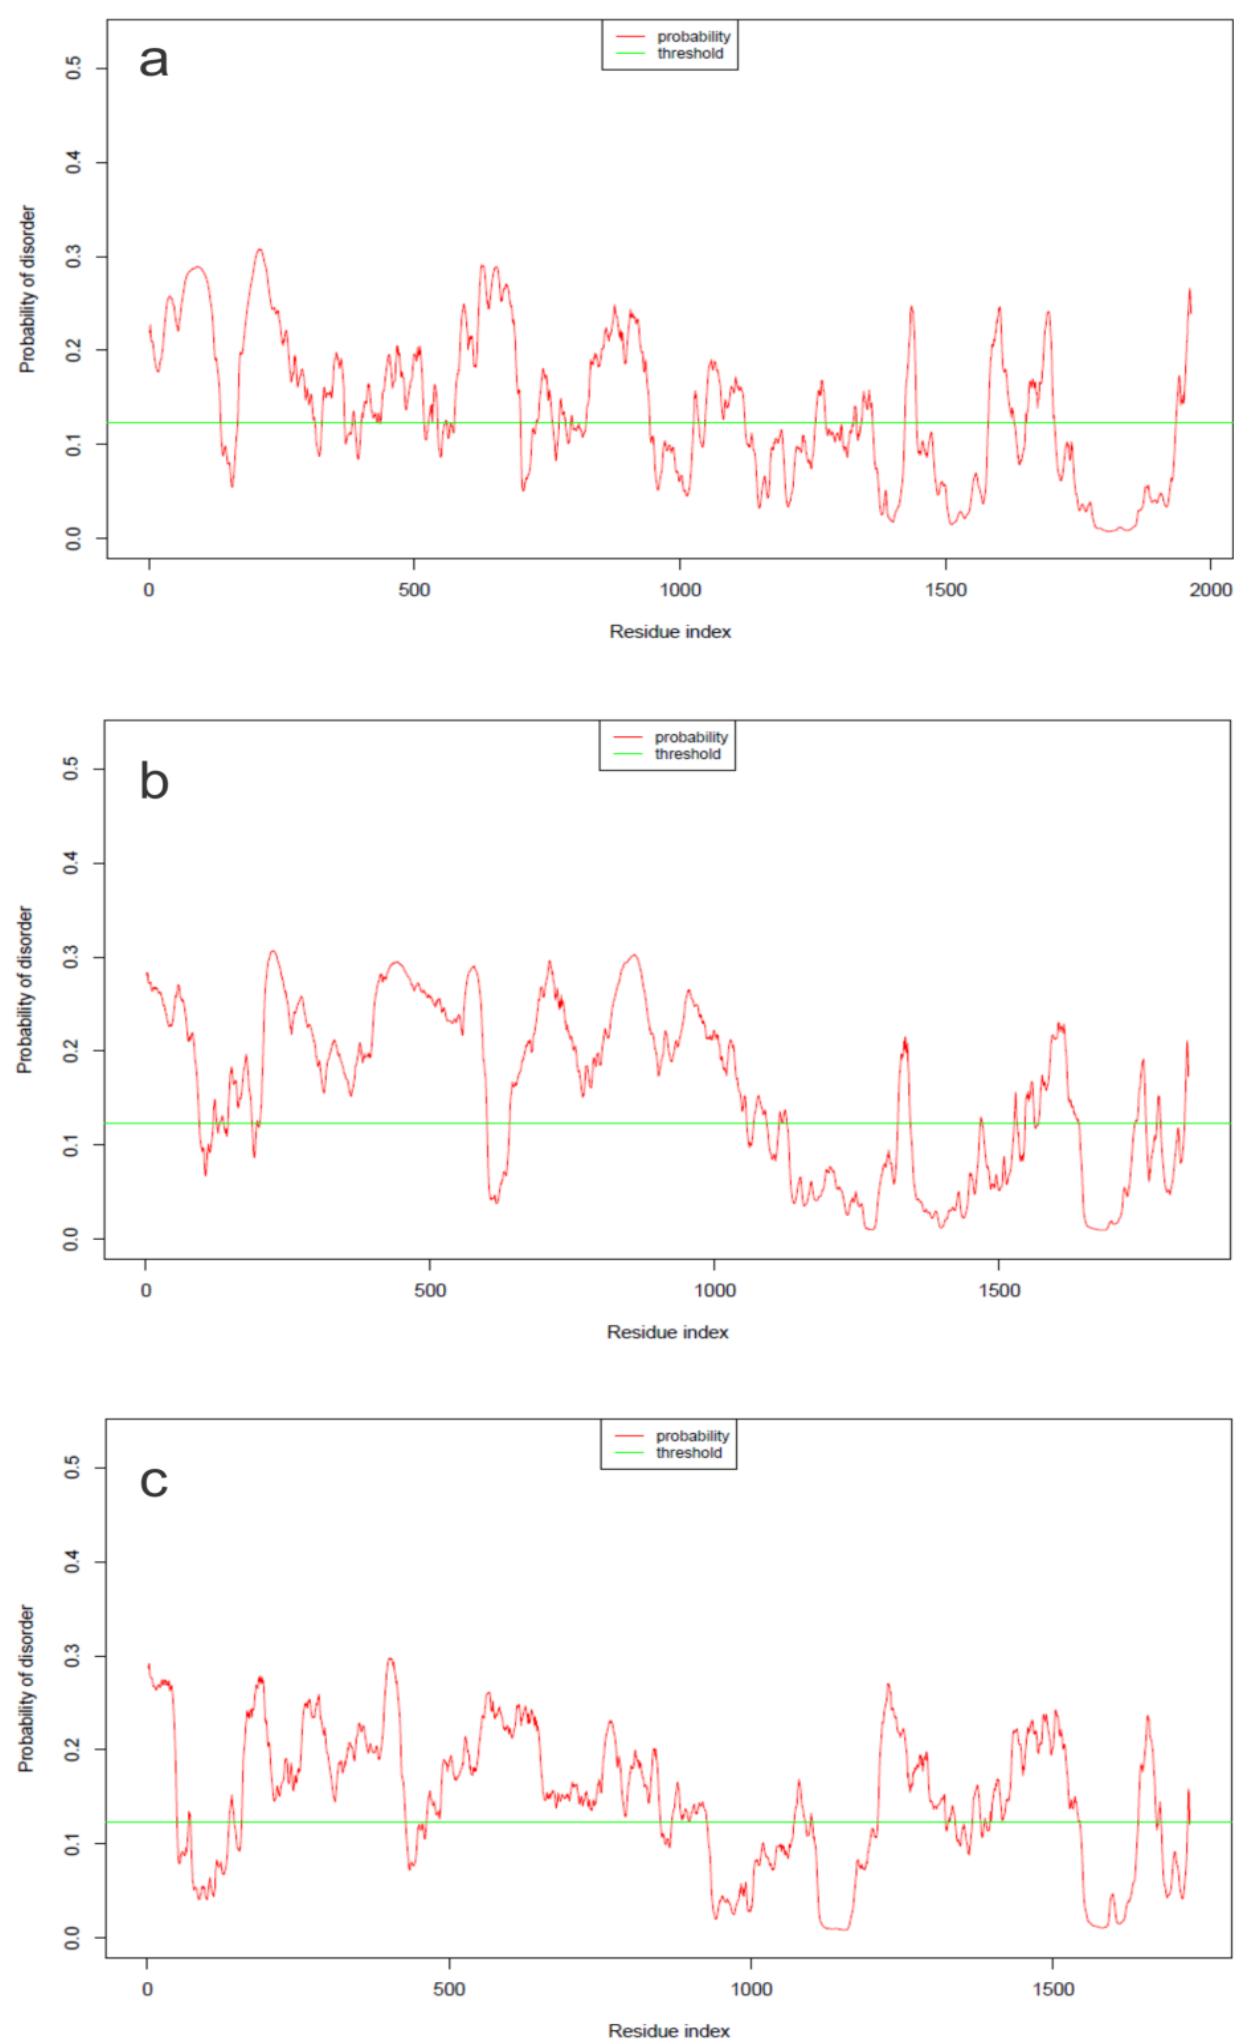

### Supplementary References

1. Walsh, I.; Martin, A.J.; Di Domenico, T.; Vullo, A.; Pollastri, G.; Tosatto, S.C. CSpritz: Accurate prediction of protein disorder segments with annotation for homology, secondary structure and linear motifs. *Nucleic Acids Res.* **2011**, *39*, W190–196.
2. Simossis, V.A.; Heringa, J. PRALINE: A multiple sequence alignment toolbox that integrates homology-extended and secondary structure information. *Nucleic Acids Res.* **2005**, *33*, W289–294.
3. Gouet, P.; Courcelle, E. ENDscript: A workflow to display sequence and structure information. *Bioinformatics* **2002**, *18*, 767–768.
4. Leluk, J. A non-statistical approach to protein mutational variability. *Biosystems* **2000**, *56*, 83–93.
5. Gouet, P.; Courcelle, E.; Stuart, D.I.; Metoz, F. ESPript: Analysis of multiple sequence alignments in PostScript. *Bioinformatics* **1999**, *15*, 305–308.
6. Gouet, P.; Robert, X.; Courcelle, E. ESPript/ENDscript: Extracting and rendering sequence and 3D information from atomic structures of proteins. *Nucleic Acids Res.* **2003**, *31*, 3320–3323.
